# Supplementary material for: Protocol for a prospective descriptive prevalence study of catatonia in an acute mental health unit in urban South Africa
Source: PubMed Central journal article supplement — BMJ Open. 2020 Nov 6;10(11):e040176. doi: 10.1136/bmjopen-2020-040176 (PMC7651726; doi:10.1136/bmjopen-2020-040176), 2020-11-06
Supplement: bmjopen-2020-040176.draft_revisions.pdf [file bmjopen-2020-040176.draft_revisions.pdf]

# BMJ Open

BMJ Open is committed to open peer review. As part of this commitment we make the peer review history of every article we publish publicly available.

When an article is published we post the peer reviewers' comments and the authors' responses online. We also post the versions of the paper that were used during peer review. These are the versions that the peer review comments apply to.

The versions of the paper that follow are the versions that were submitted during the peer review process. They are not the versions of record or the final published versions. They should not be cited or distributed as the published version of this manuscript.

BMJ Open is an open access journal and the full, final, typeset and author-corrected version of record of the manuscript is available on our site with no access controls, subscription charges or pay-per-view fees (<http://bmjopen.bmj.com>).

If you have any questions on BMJ Open's open peer review process please email [info.bmjopen@bmj.com](mailto:info.bmjopen@bmj.com)

# BMJ Open

## A Prospective Descriptive Prevalence Study of Catatonia in an Acute Mental Health Unit in Urban South Africa

|                               |                                                                                                                                                                                                                                                                                                                                                                                              |
|-------------------------------|----------------------------------------------------------------------------------------------------------------------------------------------------------------------------------------------------------------------------------------------------------------------------------------------------------------------------------------------------------------------------------------------|
| Journal:                      | <i>BMJ Open</i>                                                                                                                                                                                                                                                                                                                                                                              |
| Manuscript ID                 | bmjopen-2020-040176                                                                                                                                                                                                                                                                                                                                                                          |
| Article Type:                 | Protocol                                                                                                                                                                                                                                                                                                                                                                                     |
| Date Submitted by the Author: | 26-May-2020                                                                                                                                                                                                                                                                                                                                                                                  |
| Complete List of Authors:     | Zingela, Zukiswa; Walter Sisulu University, Psychiatry and Human Behavioural Sciences; Walter Sisulu University, Dr. Stroud, Louise; Nelson Mandela University, Psychology<br>Cronje, Johan; Nelson Mandela Metropolitan University, Psychology<br>Fink, Max; Stony Brook University, Psychiatry<br>Van Wyk, Stephanus ; Walter Sisulu University, Psychiatry and Human Behavioural Sciences |
| Keywords:                     | Neurology < INTERNAL MEDICINE, Adult psychiatry < PSYCHIATRY, MENTAL HEALTH                                                                                                                                                                                                                                                                                                                  |
|                               |                                                                                                                                                                                                                                                                                                                                                                                              |

SCHOLARONE™  
Manuscripts

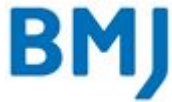

I, the Submitting Author has the right to grant and does grant on behalf of all authors of the Work (as defined in the below author licence), an exclusive licence and/or a non-exclusive licence for contributions from authors who are: i) UK Crown employees; ii) where BMJ has agreed a CC-BY licence shall apply, and/or iii) in accordance with the terms applicable for US Federal Government officers or employees acting as part of their official duties; on a worldwide, perpetual, irrevocable, royalty-free basis to BMJ Publishing Group Ltd ("BMJ") its licensees and where the relevant Journal is co-owned by BMJ to the co-owners of the Journal, to publish the Work in this journal and any other BMJ products and to exploit all rights, as set out in our [licence](#).

The Submitting Author accepts and understands that any supply made under these terms is made by BMJ to the Submitting Author unless you are acting as an employee on behalf of your employer or a postgraduate student of an affiliated institution which is paying any applicable article publishing charge ("APC") for Open Access articles. Where the Submitting Author wishes to make the Work available on an Open Access basis (and intends to pay the relevant APC), the terms of reuse of such Open Access shall be governed by a Creative Commons licence – details of these licences and which [Creative Commons](#) licence will apply to this Work are set out in our licence referred to above.

Other than as permitted in any relevant BMJ Author's Self Archiving Policies, I confirm this Work has not been accepted for publication elsewhere, is not being considered for publication elsewhere and does not duplicate material already published. I confirm all authors consent to publication of this Work and authorise the granting of this licence.

# **A Prospective Descriptive Prevalence Study of Catatonia in an Acute Mental Health Unit in Urban South Africa**

Zukiswa Zingela,<sup>1</sup> Louise Stroud,<sup>2</sup> Johan Cronje,<sup>2</sup> Max Fink,<sup>3</sup> Stephan van Wyk<sup>1</sup>

## **Author Affiliations**

<sup>1</sup>Department of Psychiatry and Human Behavioural Science, Walter Sisulu University, Mthatha, South Africa

<sup>2</sup>Department of Psychology, Nelson Mandela University, Port Elizabeth, South Africa

<sup>3</sup>Department of Psychiatry, Stony Brook University, New York, United States of America

Word Count: 3797

## **Corresponding author**

Zukiswa Zingela: email: [zzingela@wsu.ac.za](mailto:zzingela@wsu.ac.za), Postnet Suite 274, Private Bag X13130, Humewood, 6013, South Africa

Tel +2747-502-1977

ORCID: 0000000234251145

## **ABSTRACT**

### **Introduction**

Catatonia arises from serious mental, medical, neurological, or toxic conditions. The prevalence range is from 10 to 20 percent in other countries. South African prevalence rates are currently unknown. This is a quantitative descriptive study utilising the Bush Francis Catatonia Rating Scale as a screening tool with an information sheet for clinical information. The study will investigate: 1) prevalence of catatonia, 2) clinical and demographic correlates associated with catatonia, 3) predictors of catatonia, 4) response to treatment, and 5) subjective experience of catatonia.

### **Methods and analysis**

The setting is an acute mental health unit (MHU) within a regional, general medical hospital

1  
2  
3 in Nelson Mandela Bay, South Africa. Participants will be recruited from inpatients in the  
4 MHU over a one-year period. Most are admitted involuntarily, under the Mental Health Care  
5 Act of 2002. Patient ages range from 13 to over 65 years. Participants who screen positive for  
6 catatonia will be followed up after discharge for three months to measure outcomes. Primary  
7 outcomes will include:  
8  
9

- 10 • the 12-month prevalence rate of catatonia.
- 11 • descriptive and other data on presentation and assessment of catatonia in the MHU.

12  
13  
14  
15 Secondary outcomes will include:

- 16 • data on treatment response.
- 17 • subjective experience of catatonia.
- 18 • predictors of catatonia.

19  
20  
21  
22 Descriptive statistics, multivariate binomial logistic regression, and univariate analyses will be  
23 conducted to evaluate associations between catatonia and clinical or demographic data which  
24 could be predictors of catatonia. Survival analysis will be used to examine the time to recovery  
25 after diagnosis and initiation of treatment. The 95% confidence interval will be used to  
26 demonstrate the precision of estimates. The level of significance will be  $p \leq .05$ .

### 27 28 29 30 31 **Ethics and dissemination**

32  
33 The study has received ethical approval from the Research and Ethics Committees of  
34 the Eastern Cape Department of Health and Walter Sisulu University. The results will be  
35 disseminated as follows: at various presentations and feedback sessions; as part of a Ph.D.  
36 thesis in Psychology at Nelson Mandela University; and in a manuscript that will be  
37 submitted to a peer-reviewed journal.  
38  
39  
40  
41  
42  
43  
44  
45  
46

47  
48 **Keywords:** *Catatonia, assessment, screening tool, Bush Francis Catatonia Rating Scale,*  
49 *predictors*  
50  
51  
52  
53  
54  
55  
56  
57  
58  
59  
60

## Article Summary

### Strengths and limitations of this study

- This is the first study to examine the prevalence of catatonia in South Africa and aims to address the lack of data on prevalence rates of catatonia, presentation, optimal management, predictors, and outcomes in this setting.
- The triangulation of information sources like the Bush Francis Catatonia Rating Scale, a validated catatonia screening tool, clinical notes, and subjective reports of catatonic episodes from the participants present a unique opportunity to investigate different aspects of catatonia.
- The descriptive nature of the study and the limited number of participants could limit the applicability of significant associations between variables regarding cause and effect and the generalisability of findings.

## INTRODUCTION

In the 1880s, Kraepelin described the prevalence of catatonia as close to 20% in 500 cases.[1] Modern-day studies show a range from less than 10% to just over 20%.[1] Catatonia is often treated by psychiatrists, even though underlying causes may be other medical conditions such as neurological, infectious, endocrine, and substance-induced disorders.[1] Grover et al.[2] described close to 40% of 205 patients who had delirium and two or more catatonic symptoms on the Bush Francis Catatonia Rating Scale (BFCRS).

Luchini et al.[3] characterised catatonia as an autonomous syndrome, frequently associated with mood disorders but also observed in patients with other conditions including neurological, neurodevelopmental, physical, and toxic conditions. Current evidence has provided some answers about the categorisation of catatonia, clinical presentations, interventions, and response to treatment.[3, 4, 5, 6]

The current study will investigate the prevalence of catatonia in patients of the Dora Nginza Hospital (DNH) mental health unit (MHU) and collect data on associated risk factors and response to treatment. Due to the prominent role played by electroconvulsive therapy

1  
2  
3 (ECT) in the treatment of catatonia, the results from this study may have applicability in  
4 public mental health planning, should the prevalence of catatonia be significant enough to  
5 warrant recommendations regarding availability of ECT in public hospitals.[1]  
6  
7  
8  
9

### 10 **Catatonia in South Africa**

11 There are currently no studies describing the prevalence of catatonia in South Africa  
12 (SA), which leaves clinicians blind to the burden of the disease linked to this potentially fatal  
13 syndrome. Clinicians may, therefore, be unaware of the importance of the assessment and  
14 detection of catatonia, leading to missed opportunities to intervene in what is a highly  
15 treatable condition.  
16  
17  
18  
19

20  
21  
22 White and Robins[7] described 17 patients with catatonia in SA who received  
23 antipsychotic medication. There was a deterioration in their clinical presentation into  
24 neuroleptic malignant syndrome (NMS). The risk of precipitating NMS in this case series  
25 was linked to the administration of antipsychotics. This study also challenged the notion of  
26 NMS being viewed as a separate condition to catatonia. Since then, catatonia has not been  
27 widely studied in SA, despite the researchers' observation that it continues to present a  
28 significant and sometimes life-threatening challenge. Another study conducted in SA  
29 described the treatment of 42 catatonic patients with ECT.[8] The current study represents the  
30 first stages of aiming to fill the gap in the extant research with a prospective study on  
31 prevalence and predictive data.  
32  
33  
34  
35  
36  
37  
38  
39  
40

### 41 **Prevalence of catatonia in other parts of the world**

42  
43 Fink and Taylor [1] described a rate of catatonia of 10% in acutely ill psychiatric  
44 patients and Stuiivenga and Morrens [9] a rate of 16.9% when applying the DSM-5 criteria.  
45 Conditions found in association with a catatonic presentation have included psychiatric  
46 diagnoses like bipolar disorder, delirious mania, psychotic depression, schizophrenia, and  
47 other medical conditions.[4, 9] In some instances, the cause leading to catatonia has been less  
48 well-defined. DSM-5 has captured the multiple possible associations that occur with catatonia  
49 by including it as a specifier for mood disorders and schizophrenia or as linked to another  
50 medical condition.[10] Catatonia also appears as an entity with undefined aetiology under  
51 'catatonia not otherwise specified'. [6]  
52  
53  
54  
55  
56  
57  
58  
59  
60

### Choice of screening tool and rating scale

In 1996, Bush et al. designed the BFCRS, a 14-item scale for screening and a 23-item scale for diagnosis of catatonia.[11, 12] They demonstrated that the scale was a reliable and valid tool for diagnosis and evaluation of response to treatment. It has a dual utility of screening and measurement of the severity of catatonia. A systematic review of seven catatonia rating scales reported a similar finding when comparing the BFCRS with other tools to screen for catatonia.[13] They recommend the BFCRS for routine use because of ease of use, reliability, and validity. Wilson et al.[14] found 300 out of 339 patients with acute medical and psychiatric illness screened positive for catatonia when applying the BFCRS.

The BFCRS has been used successfully as a screening tool and rating scale for the past seven years in the MHU which is the site of the current study. Other reasons supporting the utility of the BFCRS in this study are: 1) the reported ease of use, 2) reliability, 3) validity as both a screening tool and a measure of severity, and 4) its use since 2011 in the study site has not yielded any issues with applicability or appropriateness when used in this clinical setting. Figure 1 reflects the assessment tools and process that will be applied to assess participant and collect data.

### Management of catatonia

The biological treatment for catatonia has advanced over the last century, from insulin coma therapy of the early 1930s and Meduna's use of seizure-inducing camphor oil injections to Cerletti's first documented use of an electric shock procedure in 1938.[1] Available evidence on management of catatonia includes the published works from various researchers.[1, 4, 5, 7,14-19] Lorazepam and ECT are the current recommended treatments, irrespective of aetiology. They are effective in most cases.[1, 5, 7, 14, 17]

In both in the White and Robins[7] and Fricchione et al.[5] case series, intravenous administration of benzodiazepines (diazepam or lorazepam) was demonstrated as an efficacious treatment for catatonia. Response is seen relatively rapidly, i.e. within minutes of administration. Instead of a sedative effect that one observes with the administration of benzodiazepines in non-catatonic patients, those with catatonia tend to 'wake up' from stupor or normalise from a state of extreme excitement. In the White and Robins[7] study, two



1  
2  
3 patients who did not receive intravenous benzodiazepines died.  
4

5 The dose range used at the study site tends to be higher and is given more frequently  
6 compared to the recommendation in the Rasmussen et al. paper.[19] This is mainly because  
7 patients at the site present at advanced stages of catatonia and tend to respond slowly or not at  
8 all when the lower or less frequent doses are employed.  
9  
10  
11  
12

### 13 **The subjective experience of catatonia**

14  
15 Northhoff et al.[20] conducted a retrospective study on 24 catatonic patients post-  
16 recovery after a catatonic episode. The patients reported intense emotions which could not be  
17 controlled and ambivalence with less focus on their altered movements. Other descriptions of  
18 catatonia have stated an extreme fear response characterized by freezing, likened to the  
19 defence seen in animals of tonic immobility or freezing in the face of danger.[21]  
20  
21  
22  
23  
24  
25

26 This study will investigate the subjective experience of catatonia as described by  
27 participants once discharged from the hospital, to shed light on the emotive and cognitive  
28 experience of catatonia in the study cohort. This may provide clues on the psychological  
29 drivers of the catatonic response and could pave the way for further research into the  
30 psychology of the catatonic response.  
31  
32  
33  
34  
35

### 36 **Aims**

37 This study aims to expand the understanding of catatonia in the South African setting  
38 so that recognition and management of the syndrome can be enhanced. This will be achieved  
39 through investigating the prevalence of catatonia in the DNH MHU, describing the clinical  
40 and demographic correlates associated with catatonia and response to treatment, identifying  
41 risk factors, and describing the subjective experience of catatonia.  
42  
43  
44  
45  
46  
47

### 48 **Objectives**

49 The research objectives are:

- 51 1. Collection of data on and description of BFCRS scores of all consenting  
52 patients admitted to the DNH MHU over 12 months.
- 53 2. Identification of participants diagnosed with catatonia based on the BFCRS  
54 scores and clinical assessments performed by the admitting doctor.  
55  
56  
57  
58  
59  
60

3. Description of the demographic and clinical information, including response to treatment, in participants diagnosed with catatonia during the study period.
4. Identification of any significant clinical correlates and risk factors in participants with catatonia.
5. Follow-up of participants with catatonia once discharged from the unit at one month, two months, and three months intervals, to assess outcomes using the BFCRS and information about readmission for recurrence of any episode of mental illness.
6. Report on the experience of catatonia as described by participants once the catatonic episode has resolved.

### Research design

This is a prospective, descriptive triangulation study utilising mixed quantitative and qualitative methods. An exploratory qualitative aspect will investigate the emotive and cognitive subjective experience of participants with catatonia to establish a direction for further research. This is because there is currently limited data available on the subjective experience of catatonia, with most research focusing on quantitative aspects.

The quantitative elements of the study will include data collected from participant files of BFCRS scores upon admission, with additional clinical and demographic information collected via a pre-designed datasheet. The qualitative element will describe the participant's reported experience of the catatonic episode, post-discharge.

### METHODS AND ANALYSIS

The study will take a positivist paradigm approach to investigate the potential causal relationships between catatonia and different variables via correlational studies.[22] Creswell[23] described the positivist's approach as an attempt to identify causes, which influence outcomes, the aim being to formulate laws, thus yielding a basis for prediction and generalisation. In the current study, deductive reasoning will be applied to data collected through 1) direct observation and 2) quantitative and qualitative approaches, to identify associations with catatonia, causal relationships, and possibly, predictors of catatonia.[22]

The Bradford Hill method will be applied to examine associations and determine

1  
2  
3 potential causality.[24] Hill proposed nine criteria that may be examined to assess an  
4 association. These are: 1) the strength of association, 2) consistency, 3) specificity, 4)  
5 temporality, 5) biological gradient, 6) plausibility, 7) coherence, 8) experiment, and 9)  
6 analogy.[24]  
7  
8  
9

10  
11 Sources of information that will be utilised for triangulation include: the participants'  
12 BFCRS scores and clinical notes; field notes taken by the research team during direct  
13 observation and interviews; and participant and relative interviews focusing on response to  
14 treatment, food insecurity, and the subjective experience of catatonia. Additionally, the mixed  
15 methods nature of the study will enable the generation of both objective (as documented by  
16 treating and research teams) and subjective data regarding the experience of catatonia. This  
17 type of triangulation is an important tool for meeting the goals of this study while facilitating  
18 a holistic assessment of catatonia in this cohort.  
19  
20  
21  
22  
23  
24  
25  
26

### 27 **The study process and outline**

28  
29 Two research assistants (RAs) with a background in health will be recruited to assist  
30 the researcher with fieldwork. A health background is necessary to understand the medical  
31 terminology that is utilised in the clinical notes and screening tools. A part-time  
32 administrative assistant will be contracted to assist with data capturing and collation.  
33  
34 Fieldwork will include the recruitment of participants and collection of data by the researcher  
35 and RAs. There will be a limited follow-up component that extends to up to three months  
36 following discharge from the hospital.  
37  
38  
39  
40  
41  
42

43 The RAs will be trained by the researcher on:

- 44 1) application of the BFCRS to ensure they are knowledgeable about the screening  
45 tool, its application, and its interpretation, and
- 46 2) assessment of capacity to consent utilising the University of California, San Diego  
47 Brief Assessment of Capacity to Consent Questionnaire (UBACC).  
48  
49

50 The UBACC has been applied successfully in the Eastern and Western Cape in study  
51 cohorts recruited from inpatient mental health institutions.[25, 26]  
52  
53  
54  
55

56 The researcher and RAs will assess participants who meet the inclusion criteria for  
57  
58  
59  
60

1  
2  
3 capacity to consent, utilising the UBACC. All those with the capacity to consent will be  
4 requested to consider entering the study. For participants who may be assessed as lacking the  
5 capacity to consent, their closest relatives or guardians will be requested to consent on their  
6 behalf through proxy consent (proxy consent and its ethical application is further discussed in  
7 the section 'Ethics and dissemination' on pages 13-14). Additionally, in those assessed to  
8 lack capacity to consent, such capacity will be reviewed weekly to allow for further re-  
9 engagement on their consent to take part in the study, the ultimate aim being to change from  
10 proxy consent to personal consent as soon as potential participants have regained capacity.  
11 Data collected about any participant who chooses to withdraw from the study will be  
12 removed from the study data sets and destroyed.  
13  
14  
15  
16  
17  
18  
19  
20  
21

22 The research team will collect data from the clinical files of consenting participants  
23 on BFCRS scores and additional descriptive and demographic information as guided by the  
24 study questionnaire and study protocol. The completed data capturing forms will be  
25 submitted to the administrative assistant for data collation and entry into a spreadsheet at the  
26 end of each week.  
27  
28  
29  
30  
31

32 During the limited follow-up period, the researcher and RAs will repeat the BFCRS  
33 assessment and conduct face-to-face interviews with participants regarding their experience  
34 of catatonia at one month, two months, and three months post-discharge. Recurrence of  
35 symptoms or readmissions since the last discharge will be documented. The participant's  
36 willingness to continue with the study will be reviewed during every visit to ensure their  
37 consent remains valid throughout. Figure 2 is a summary of the study process that will be  
38 followed.  
39  
40  
41  
42  
43  
44  
45

## 46 **Setting**

47 The setting will be a 35-bed MHU within DNH, a general hospital in the Eastern Cape  
48 Province in South Africa. The hospital is in Zwide, Port Elizabeth and serves a population of  
49 over one million within an urban area with a high morbidity of mental illness.[27] The MHU  
50 admits persons who present with acute mental illness requiring inpatient treatment.  
51  
52  
53  
54  
55

## 56 **Sampling**

1  
2  
3 Convenience sampling of all patients admitted to the MHU over a twelve-month  
4 period will be undertaken. Contact details of all consenting participants who have screened  
5 positive for catatonia will be entered into a database to enable contact for future follow-up at  
6 the end of one month, two months, and three months post-discharge. This information will be  
7 password encrypted. Admission rates at the DNH MHU for the past three years have been  
8 1200 to 1300 annually, with an average length of stay of approximately ten to fourteen days.  
9 Thus, a realistic estimation based on these previous unit statistics and assuming a  
10 conservative catatonia prevalence of 5% to 8% is that around 60-100 participants may be  
11 expected to present with catatonia during the study period.  
12  
13  
14  
15  
16  
17  
18  
19

## 20 **Participants**

21 Most people admitted to the DNH MHU are involuntary admissions under the Mental  
22 Health Care Act of 2002.[28] Age of admission ranges from 13 to over 65 years because  
23 there are no child, adolescent, or geriatric inpatient-specific services in the region.  
24  
25  
26  
27  
28

## 29 **Inclusion criteria**

30 All patients admitted to the unit during the study period will be eligible for inclusion.  
31 Those who screen positive for two or more catatonic signs and symptoms on the BFCRS will  
32 be included during the follow-up period for the qualitative part of the study.  
33  
34  
35  
36  
37

## 38 **Exclusion criteria**

39 Refusal to take part in the study, whether through the direct patient consent process or  
40 the proxy consent process, will result in the exclusion of the patient.  
41  
42  
43  
44

## 45 **Methods of assessment and measurement**

46 The BFCRS is a 14 or 23-item scale (see Appendix A) that is used to screen for  
47 catatonia.[11] It is used as a 14-item scale on initial assessment or the full 23-items are used  
48 to determine severity. Participants' responses to the standard interventions of intravenous  
49 lorazepam administration or ECT will be documented by the admitting doctor in the case  
50 notes. The research team will then capture this information on a predesigned data collection  
51 sheet. A 50% reduction in signs and symptoms in response to the treatment intervention  
52 represents a response while a 100% reduction is considered full resolution.  
53  
54  
55  
56  
57  
58  
59  
60

1  
2  
3  
4  
5 The data collection sheet will collect information on demographics, clinical data, and  
6 food insecurity, using the participants' case notes as a primary source of information as well  
7 as direct observation of the participants. Additional information will be sought from relatives  
8 if the participant is unable to respond adequately to information required on food security  
9 questions due to the severity of catatonic symptoms, or in those who are unable to provide the  
10 additional information for whatever other reason.  
11  
12  
13  
14  
15  
16

17 Regarding social determinants of mental health, current evidence indicates that those  
18 who are poor or disadvantaged suffer disproportionately from common mental disorders and  
19 their adverse consequences.[29] The strength of the association with poverty has at times  
20 varied depending on the type of poverty measure used. Food insecurity as a poverty measure  
21 is one of the factors with a consistent and strong association with common mental  
22 disorders.[30] In this study, the administration of a food security questionnaire will be  
23 utilised to assess the correlation of poverty to catatonia. Two food insecurity questions are  
24 drawn from the USDA's 18-question Household Food Security Scale.[31] They make up The  
25 Hunger Vital Sign Questionnaire, a validated two-question food insecurity screening tool  
26 used in the clinical setting. The questions are:  
27  
28  
29  
30  
31  
32  
33

- 34 1. Within the past 12 months, we worried whether our food would run out  
35 before we got money to buy more.
- 36 2. Within the past 12 months, the food we bought just did not last and we did  
37 not have money to get more.  
38  
39  
40  
41  
42

43 During the follow-up period, participants will be asked to describe their experience of  
44 the catatonic episode as well as their perception of recovery.  
45  
46  
47

### 48 **Expected outputs**

- 49 • The 12-month prevalence rate of catatonia.
- 50 • Descriptive and other data on presentation and assessment of catatonia in the DNH  
51 unit.  
52
- 53 • Data on treatment response, short-term outcomes, and subjective experience of  
54 catatonia.  
55  
56  
57  
58  
59  
60

- Predictors for catatonia based on clinical correlates and other descriptive data collected.
- Recommendations and guidelines for the management of catatonia and possible prevention strategies.

### **Data management and analysis**

Quantitative data collected will be summarised using descriptive statistics. Categorical variables will be presented using frequency tables, percentages, and graphs. Two or more categorical variables will be compared using contingency tables (e.g. 2 X 2 Table) and the expected frequencies will be calculated to determine the type of test best suited to determine the extent of any identified relative associations. If the expected frequencies in all cells are  $\geq 5$  then the Chi-squared test will be used and if the expected frequencies are  $< 5$  in any cells then the Fisher's exact test will be used.

Binomial logistic regression will also be conducted to determine the predictors of catatonia and to estimate the risk ratio. If the numerical data are not normally distributed, non-parametric statistics will be used (median and interquartile range). The best fitting model of multivariate analysis will be chosen through forward selection of model building. The model with the lowest Bayesian information criterion will be selected as the better model and the 95% confidence interval will be used to estimate the precision of estimates. Survival analysis will be used to determine the time to recovery and the hazard ratio (i.e. the total number and timing of each event indicating relapse in this study) will be reported for this purpose.

Qualitative data collated during the follow-up period will be analysed to elucidate the subjective experience of catatonia in this cohort. Aspects of the thematic analysis presented by Braun and Clarke[32] will be applied to identify themes. Themes will be identified through a framework approach identifying word repetition, local expressions, metaphors and similarities, differences, and keywords. A tentative hypothesis and theory regarding the experience of catatonia will be presented based on emergent themes. Data collected during the quantitative and qualitative segments of the study will be analysed separately but compared for congruency of reported information to enhance data integration.

In summary, data integration will be in the form of:

- i. converting information gathered from the quantitative aspects of the study into numerical information that can be processed through application of statistical methods to test for correlations and associations.
- ii. identifying common themes through field notes taken when interviewing participants during the outpatient stage of the study.
- iii. Assessing congruency between common themes with regard to the subjective experience of catatonia as described by participants and commonly identified presenting symptoms as highlighted in case notes and listed in the data collection sheet. The advantage of this approach is that it strengthens the validity and reliability of the study.

## **ETHICS AND DISSEMINATION**

Ethics clearance has been granted for the study by the Eastern Cape Department of Health Ethics Committee and the Walter Sisulu University Research and Ethics Committee. The protocol is also required to be submitted to the Nelson Mandela University Research Ethics Committee (Human) for approval. The study does not have any intervention arm.

All patients admitted to the unit will be presented with an information leaflet on the study in English or Xhosa. Consent for inclusion in the study will be obtained from all participants who have the capacity to consent, which will be determined through application of the UBACC. Proxy consent will be sought from a relative or guardian for all patients who lack the capacity to consent or are minors between the ages of 13 and 18 years of age. The use of proxy consent in mental health research is applicable for those who lack the capacity to consent and the nearest relative or guardian consents on their behalf. It is permissible within the mental health care setting due to the challenges with capacity to consent that may exist in patients with acute mental illness.[33] Proxy consent ensures that respondents' rights are guarded while making it possible to include individuals or groups who may potentially benefit from scientific advances gained from research. This approach is also supported by the Helsinki Declaration on ethical research which states that 'for a research subject who is legally incompetent, physically or mentally incapable of giving consent or is a legally incompetent minor, the investigator must obtain informed consent from the legally authorised representative in accordance with applicable law'.[34] The Department of Health Guidelines



1  
2  
3 on ethics in health research similarly state that persons should not be excluded unfairly based  
4 on discrimination or disability.[35]  
5  
6  
7

8 The Mental Health Care Act (MHCA) of 2002 also makes a reference as to whom  
9 may be considered an associate of a patient admitted under the Mental Health Care Act: e.g. a  
10 spouse, next of kin, partner, associate, parent, or guardian.[28] A similar approach will be  
11 taken for this research. All data will be anonymised and stored under lock and key, with  
12 access granted to the research team only.  
13  
14  
15  
16  
17

### 18 **Dissemination of results**

19 The results will be presented at feedback sessions with the Hospital Board, Eastern  
20 Cape Department of Health and at national and international congresses and may be used to  
21 compile guidelines on assessment and management of catatonia in the region. They will also  
22 be compiled as a thesis, which will be submitted for examination for a Ph.D. in Psychology at  
23 Nelson Mandela University. A research report based on the study results will be submitted to  
24 peer-reviewed journals to be considered for publication.  
25  
26  
27  
28  
29  
30  
31  
32  
33

### 34 **REFERENCES**

- 35 1 Fink M, Taylor MA. Catatonia: A Clinician's Guide to Diagnosis and Treatment.  
36 Cambridge: Cambridge University Press 2003.  
37
- 38 2 Grover S, Ghosh A, Ghormode D. Do patients of delirium have catatonic features? An  
39 exploratory study. *Psychiatry Clin Neurosci* 2014;68:644-51. doi:[10.1111/pcn.12168](https://doi.org/10.1111/pcn.12168)  
40
- 41 3 Luchini F, Medda P, Mariani MG, Mauri M, Toni C, Perugi G. Electroconvulsive therapy  
42 in catatonic patients: efficacy and predictors of response. *World J Psychiatry* 2015;5:182-  
43 92. doi:[10.5498/wjp.v5.i2.182](https://doi.org/10.5498/wjp.v5.i2.182)  
44
- 45 4 Fink M, Taylor MA. The many varieties of catatonia. *Eur Arch Psychiatry Clin Neurosci*  
46 2001;251:I8-I13. doi:10.1007/PL00014200  
47
- 48 5 Fricchione GL, Cassem NH, Hooberman D, Hobson D. Intravenous lorazepam in  
49 neuroleptic-induced catatonia. *J Clin Psychopharmacol* 1983;3:338-42.  
50
- 51 6 Tandon R, Heckers S, Bustillo J, et al. Catatonia in DSM-5. *Schizophr Res* 2013;150:26-  
52 30. doi:[10.1016/j.schres.2013.04.034](https://doi.org/10.1016/j.schres.2013.04.034)  
53  
54  
55  
56  
57

- 1
  - 2
  - 3
  - 4
  - 5
  - 6
  - 7
  - 8
  - 9
  - 10
  - 11
  - 12
  - 13
  - 14
  - 15
  - 16
  - 17
  - 18
  - 19
  - 20
  - 21
  - 22
  - 23
  - 24
  - 25
  - 26
  - 27
  - 28
  - 29
  - 30
  - 31
  - 32
  - 33
  - 34
  - 35
  - 36
  - 37
  - 38
  - 39
  - 40
  - 41
  - 42
  - 43
  - 44
  - 45
  - 46
  - 47
  - 48
  - 49
  - 50
  - 51
  - 52
  - 53
  - 54
  - 55
  - 56
  - 57
  - 58
  - 59
  - 60
- 7 White DA, Robins AH. An analysis of 17 catatonic patients diagnosed with neuroleptic malignant syndrome. *CNS Spectr* 2000;5:58-65. doi:[10.1017/S1092852900013419](https://doi.org/10.1017/S1092852900013419)
- 8 Odayar K, Eloff I, Esterhuysen W. Clinical and demographic profile of catatonic patients who received electroconvulsive therapy in a South African setting. *S Afr J Psychiatr* 2018;24:1-5. doi:[10.4102/sajpsychiatry.v24i0.1100](https://doi.org/10.4102/sajpsychiatry.v24i0.1100)
- 9 Stuiivenga M, Morrens M. Prevalence of the catatonic syndrome in an acute inpatient sample. *Front Psychiatry* 2014;5:174. doi:[10.3389/fpsy.2014.00174](https://doi.org/10.3389/fpsy.2014.00174)
- 10 American Psychiatric Association. Diagnostic and Statistical Manual of Mental Disorders: DSM- 5. Washington: American Psychiatric Association 2013.
- 11 Bush G, Fink M, Petrides G, et al. Catatonia. I. Rating scale and standardized examination. *Acta Psychiatr Scand* 1996;93:129-36. doi:[10.3389/fpsy.2014.00174](https://doi.org/10.3389/fpsy.2014.00174)
- 12 Sienaert P, Dhossche DM, Vancampfort D, et al. A clinical review of the treatment of catatonia. *Front Psychiatry* 2014;5:181. doi:[10.3389/fpsy.2014.00181](https://doi.org/10.3389/fpsy.2014.00181)
- 13 Sienaert P, Rooseleer J, De Fruyt J. Measuring catatonia: a systematic review of rating scales. *J Affect Disord* 2011;135:1-9. doi:[10.1016/j.jad.2011.02.012](https://doi.org/10.1016/j.jad.2011.02.012)
- 14 Wilson J, Niu, K, Nicholson SE, et al. The diagnostic criteria and structure of catatonia. *Schizophr Res* 2015;164:256–62. doi:[10.1016/j.schres.2014.12.036](https://doi.org/10.1016/j.schres.2014.12.036)
- 15 Fink M, Taylor MA. Electroconvulsive therapy: evidence and challenges. *JAMA* 2007;298:330-332. doi:10.1001/jama.298.3.330
- 16 Fink M. What was learned: studies by the consortium for research in ECT (CORE) 1997–2011. *Acta Psychiatr Scand* 2014;129:417-26. doi:[10.1111/acps.12251](https://doi.org/10.1111/acps.12251)
- 17 Petrides G, Fink M, Husain MM, et al. ECT remission rates in psychotic versus nonpsychotic depressed patients: a report from CORE. *J ECT* 2001;17:244-53.
- 18 Rosebush PI, Hildebrand AM, Furlong BG, et al. Catatonic syndrome in a general psychiatric inpatient population: frequency, clinical presentation, and response to lorazepam. *J Clinical Psychiatry* 1990;51:357-62.
- 19 Rasmussen SA, Mazurek MF, Rosebush PI. Catatonia: our current understanding of its diagnosis, treatment and pathophysiology. *World J Psychiatry* 2016;6:391–8. doi:[10.5498/wjp.v6.i4.391](https://doi.org/10.5498/wjp.v6.i4.391)
- 20 Northoff G, Krill W, Wenke J, et al. The subjective experience in catatonia: systematic study of 24 catatonic patients. *Psychiatr Prax* 1996;23:69-73.
- 21 Moskowitz AK. “Scared Stiff”: catatonia as an evolutionary-based fear response. *Psychol*

- 1  
2  
3  
4  
5  
6  
7  
8  
9  
10  
11  
12  
13  
14  
15  
16  
17  
18  
19  
20  
21  
22  
23  
24  
25  
26  
27  
28  
29  
30  
31  
32  
33  
34  
35  
36  
37  
38  
39  
40  
41  
42  
43  
44  
45  
46  
47  
48  
49  
50  
51  
52  
53  
54  
55  
56  
57  
58  
59  
60
- Rev 2004;111:984-1002. doi:10.1037/0033-295X.111.4.984
- 22 Scotland J. Exploring the philosophical underpinnings of research: relating ontology and epistemology to the methodology and methods of the scientific, interpretive, and critical research paradigms. *English Language Teaching* 2012;5:9-16
- 23 Creswell JW. *Research Design: Qualitative and Mixed Methods Approaches*. London: Sage 2009.
- 24 Fedak K, Bernal A, Capshaw ZA, et al. Applying the Bradford Hill criteria in the 21st century: how data integration has changed causal inference in molecular epidemiology. *Emerg Themes Epidemiol* 2015;12:14. doi:10.1186/s12982-015-0037-4
- 25 Campbell MM, Susser E, Mall S, et al. Using iterative learning to improve understanding during the informed consent process in a South African psychiatric genomics study. *PLoS ONE* 2017;12:e0188466. doi:[10.1371/journal.pone.0188466](https://doi.org/10.1371/journal.pone.0188466)
- 26 Campbell MM, de Vries J, Mqulwana SG, et al. Predictors of consent to cell line creation and immortalisation in a South African schizophrenia genomics study. *BMC Med Ethics* 2018;19:72. doi:10.1186/s12910-018-0313-2
- 27 Statistics South Africa: Nelson Mandela Bay [Internet]. Republic of South Africa, c2011 [cited 20 February 2020]. Available from: [http://www.statssa.gov.za/?page\\_id=993&id=nelson-mandela-bay-municipality](http://www.statssa.gov.za/?page_id=993&id=nelson-mandela-bay-municipality).
- 28 Mental Health Care Act 2002 (Act no. 17 of 2002) General Regulations [Internet]. Government Gazette, Republic of South Africa, 15 December 2004, No. 27117, c2004 [cited 17 February 2020]. Available from: [https://www.gov.za/sites/default/files/gcis\\_document/201409/a17-02.pdf](https://www.gov.za/sites/default/files/gcis_document/201409/a17-02.pdf).
- 29 World Health Organization. Social determinants of mental health [Internet]. Geneva: World Health Organization, c2014 [cited 23 March 2020]. Available from: [https://www.who.int/mental\\_health/publications/gulbenkian\\_paper\\_social\\_determinants\\_of\\_mental\\_health/en/](https://www.who.int/mental_health/publications/gulbenkian_paper_social_determinants_of_mental_health/en/).
- 30 Lund C, Breen A, Flisher AJ, et al. Poverty and common mental disorders in low-and middle-income countries: a systematic review. *Soc Sci Med* 2010;71:517–528. doi:[10.1016/j.socscimed.2010.04.027](https://doi.org/10.1016/j.socscimed.2010.04.027)
- 31 American Academy of Pediatrics. Addressing food insecurity: a toolkit for pediatricians [Internet]. c2017 [cited 21 April 2020]. Available from: <https://frac.org/wp-content/uploads/frac-aap-toolkit.pdf>Braun V, Clarke V. Using thematic analysis in

- 1  
2  
3 psychology. *Qual Res Psychol* 2006;3:77-101. doi:10.1191/1478088706qp063oa  
4  
5 32 Mason S, Barrow H, Phillips A, et al. Brief report on the experience of using proxy  
6 consent for incapacitated adults. *J Med Ethics* 2006;32:61-62.  
7  
8 doi:10.1136/jme.2005.012302  
9  
10 33 World Medical Association. World Medical Association Declaration of Helsinki. Ethical  
11 principles for medical research involving human subjects. *Bull World Health Organ*  
12 2001;79:373-4.  
13  
14 34 Department of Health, Republic of South Africa. Ethics in health research: principles,  
15 processes and structures, 2nd edition [Internet]. Pretoria: National Department of Health,  
16 c2015 [cited 23 March 2020 \_\_]. Available from:  
17 <https://www.ru.ac.za/media/rhodesuniversity/content/ethics/documents/nationalguidelines>  
18 [/DOH \(2015\) Ethics in health research Principles, processes and structures.pdf.](https://www.ru.ac.za/media/rhodesuniversity/content/ethics/documents/nationalguidelines)  
19  
20  
21  
22  
23  
24

## 25 **AUTHOR CONTRIBUTIONS**

26 Z Zingela conceived the idea and devised the project and its main conceptual ideas assisted  
27 by S van Wyk and M Fink. L Stroud and J Cronje supervised the development of this  
28 manuscript and provided editorial input.  
29  
30  
31  
32

## 33 **FUNDING STATEMENT**

34 This work was supported by the South African Medical Research Council (SAMRC), grant  
35 tracking number 2017SAMRC0SIR0000157977 and an educational grant from the Health  
36 and Welfare Sector Education and Training Authority (HWSETA).  
37  
38  
39  
40  
41

## 42 **COMPETING INTERESTS STATEMENT**

43 The authors have no competing interests to declare.  
44  
45  
46  
47

48 Figure 1

49 Assessment Tools

50  
51  
52  
53 Figure 2

54 The Study Process  
55  
56  
57  
58  
59  
60

1  
2  
3  
4  
5  
6  
7  
8  
9  
10  
11  
12  
13  
14  
15  
16  
17  
18  
19  
20  
21  
22  
23  
24  
25  
26  
27  
28  
29  
30  
31  
32  
33  
34  
35  
36  
37  
38  
39  
40  
41  
42  
43  
44  
45  
46  
47  
48  
49  
50  
51  
52  
53  
54  
55  
56  
57  
58  
59  
60

Figure 1: Assessment Tools

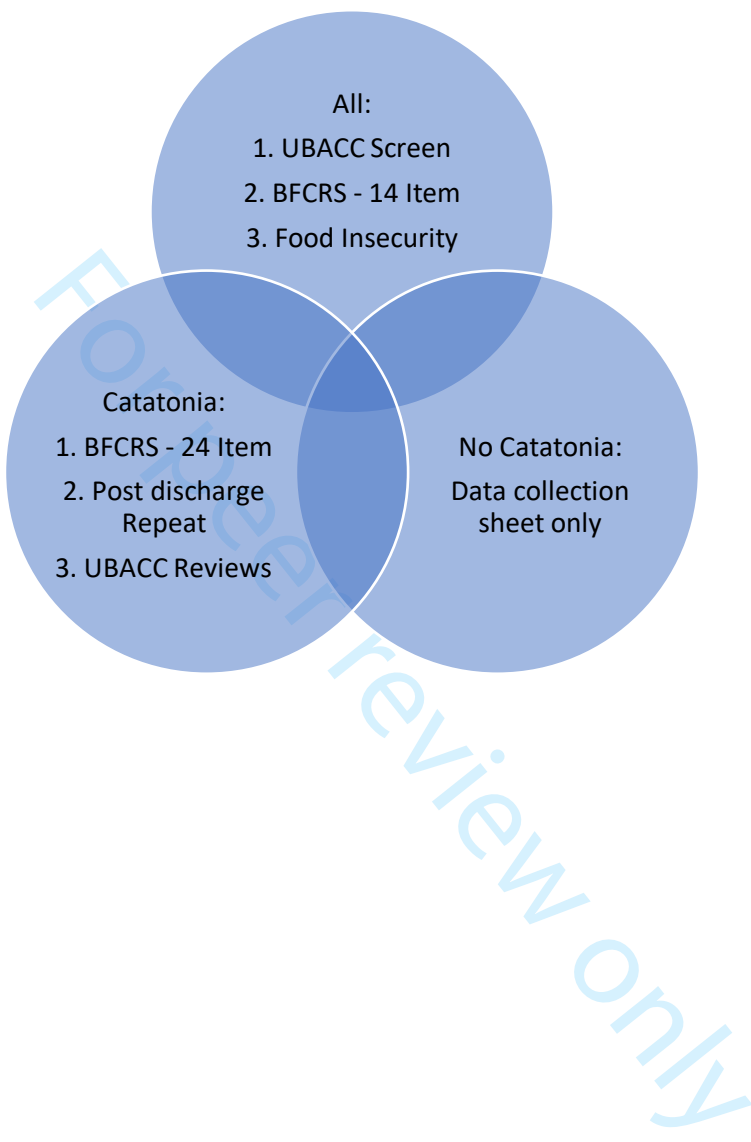

Figure 2: Study Process

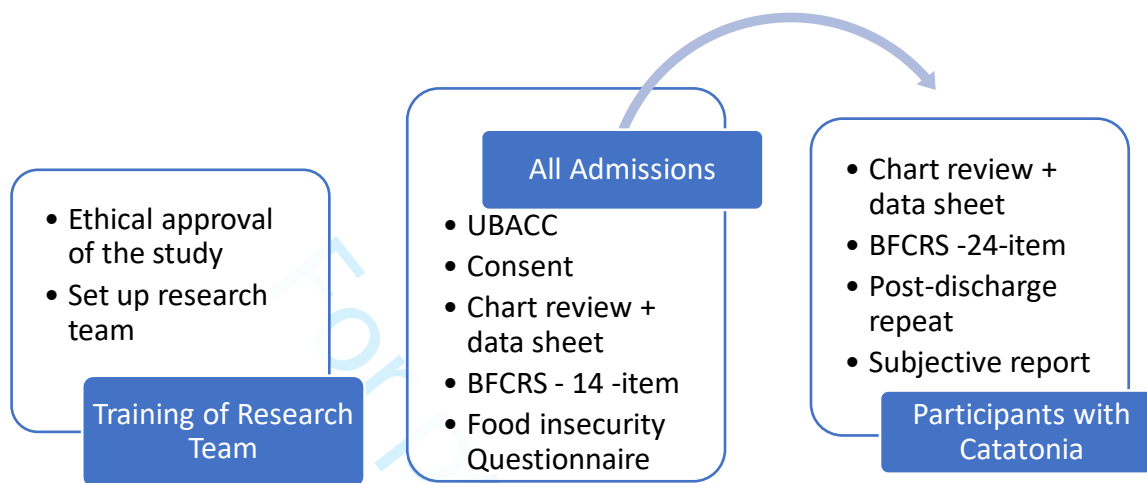

## APPENDICES

## APPENDIX 1: DATA COLLECTION SHEET

## DATA COLLECTION SHEET

| Enrolment No:       |         | Tick applicable box or insert answer in area shaded in white |                                     |                |           |   |   |       |                                  |                                                                             |                                                  |                |                            |  |  |
|---------------------|---------|--------------------------------------------------------------|-------------------------------------|----------------|-----------|---|---|-------|----------------------------------|-----------------------------------------------------------------------------|--------------------------------------------------|----------------|----------------------------|--|--|
| Unit                |         | Catatonic now?                                               |                                     |                |           |   |   |       |                                  |                                                                             |                                                  |                |                            |  |  |
| B                   | M       | 72 hr                                                        | No –fill in ONLY Sections A,G,H,I,J |                |           |   |   |       |                                  | Yes –fill in the whole data sheet<br>Attach an anonymised copy of the BFCRS |                                                  |                |                            |  |  |
|                     | A. Age  |                                                              | Sex                                 |                | Ethnicity |   |   |       | 1st admission                    | Catatonic symptoms before?                                                  | Provisional DSM -5 Psychiatric diagnosis in file | Susbtance Use? | Another medical condition? |  |  |
|                     | < 16    | 6 - 36                                                       | >                                   |                |           |   |   |       |                                  |                                                                             |                                                  |                |                            |  |  |
|                     | 35 - 65 | 65                                                           | F (0)                               | M (1)          | B         | C | I | W     | Yes                              | Yes                                                                         | Yes                                              | Yes            | Yes                        |  |  |
|                     |         |                                                              |                                     |                |           |   |   |       | No - No of previous admissions = | No                                                                          | No                                               | No             | No                         |  |  |
|                     |         |                                                              |                                     |                |           |   |   |       | Not known                        | Not known                                                                   | Not known                                        | Not known      | Not known                  |  |  |
| B. BFCR Scale Score |         | BZD or LR Rx:                                                |                                     | Blood Pressure |           |   |   | Pulse | Body Temperature                 | Respiratory Rate/ O2 Sats                                                   | Other additional clinical                        |                |                            |  |  |

1  
2  
3  
4  
5  
6  
7  
8  
9  
10  
11  
12  
13  
14  
15  
16  
17  
18  
19  
20  
21  
22  
23  
24  
25  
26  
27  
28  
29  
30  
31  
32  
33  
34  
35  
36  
37  
38  
39  
40  
41  
42  
43  
44  
45  
46  
47  
48  
49  
50  
51  
52  
53  
54  
55  
56  
57  
58  
59  
60

|               |       | No of dose/s administered |                                                |  |  |                              | parameters |
|---------------|-------|---------------------------|------------------------------------------------|--|--|------------------------------|------------|
| Initial Score |       | Nil                       |                                                |  |  |                              |            |
| At 15 minutes |       | 1                         |                                                |  |  |                              |            |
|               |       | 2                         |                                                |  |  |                              |            |
|               |       | 3                         |                                                |  |  |                              |            |
| At 30 minutes |       | 1                         |                                                |  |  |                              |            |
|               |       | 2                         |                                                |  |  |                              |            |
|               |       | 3                         |                                                |  |  |                              |            |
| At 45 minutes |       | 1                         |                                                |  |  |                              |            |
|               |       | 2                         |                                                |  |  |                              |            |
|               |       | 3                         |                                                |  |  |                              |            |
| At 60 minutes |       | 1                         |                                                |  |  |                              |            |
|               |       | 2                         |                                                |  |  |                              |            |
|               |       | 3                         |                                                |  |  |                              |            |
|               | 5 min | 1                         | <b>Length of time from presentation to ECT</b> |  |  | <b>Degree of improvement</b> |            |



|                                                                                                 |                   |                                          |                                                                                 |                            |                         |                                                               |    |
|-------------------------------------------------------------------------------------------------|-------------------|------------------------------------------|---------------------------------------------------------------------------------|----------------------------|-------------------------|---------------------------------------------------------------|----|
| <b>C.</b><br><b>Length of time to response</b><br><b>i.e.</b><br><b>50 % reduction in scale</b> | 0 min             |                                          | On admission                                                                    | 4-6 days                   | 11-13 days              | Mild = Less than 25% reduction in No. of symptoms             |    |
|                                                                                                 | 5 min             |                                          | 1-3 days                                                                        | 7 -10 days                 | ≥14 days                | Moderate = 25% to 50% reduction in No. of symptoms            |    |
|                                                                                                 | 0 min             |                                          | Reason ECT delayed for more than 3 days (from clinical notes)<br>.....<br>..... |                            |                         | Good = Response of more than 50% reduction in No. of symptoms |    |
| <b>D.</b><br><b>ECT</b>                                                                         | Yes               |                                          | Number of Sessions                                                              | Response                   |                         | Maintenance ECT prescribed or required?                       |    |
|                                                                                                 | No                |                                          |                                                                                 | Time to 50% improvement    | Time to full Resolution | Yes? If so No. of sessions?                                   | No |
| <b>E.</b><br><b>Duration of Catatonia prior to admission if known</b><br><b>Not Known</b>       | Hours to 3 days   | Duration of Catatonia Prior to admission | Any other additional information                                                |                            |                         |                                                               |    |
|                                                                                                 | 4 days            | NOT known                                |                                                                                 |                            |                         |                                                               |    |
|                                                                                                 | To 2 weeks        |                                          |                                                                                 |                            |                         |                                                               |    |
|                                                                                                 | 3 to 4 weeks      |                                          |                                                                                 |                            |                         |                                                               |    |
|                                                                                                 | More than 4 weeks |                                          |                                                                                 |                            |                         |                                                               |    |
| <b>F.</b><br><b>Gradual</b>                                                                     | Hours to 3        | Fluctuating                              | Type of onset                                                                   | Any additional information |                         |                                                               |    |

|                                                      |                                                                                                          |                         |                    |                     |                            |                           |           |
|------------------------------------------------------|----------------------------------------------------------------------------------------------------------|-------------------------|--------------------|---------------------|----------------------------|---------------------------|-----------|
| <b>vs. Rapid type if onset of catatonic symptoms</b> | days                                                                                                     |                         | Unknown            |                     |                            |                           |           |
|                                                      | 4 days to 2 weeks                                                                                        | Gradual worsening       |                    |                     |                            |                           |           |
|                                                      | 3 to 4 weeks                                                                                             | Mostly excited form     |                    |                     |                            |                           |           |
|                                                      | More than 4 weeks                                                                                        | Mostly slowed Form      |                    |                     |                            |                           |           |
| <b>G. Food Insecurity</b>                            | 1. Within the past 12 months, we worried whether our food would run out before we got money to buy more. |                         |                    |                     |                            |                           |           |
|                                                      | Often true                                                                                               | sometimes true /refused | never true         | don't know/refused  | Any additional information |                           |           |
|                                                      | 2. Within the past 12 months, the food we bought just didn't last and we didn't have money to get more.  |                         |                    |                     |                            |                           |           |
|                                                      | Often true                                                                                               | sometimes true /refused | never true         | don't know/refused  | Any additional information |                           |           |
| <b>H. Substances</b>                                 | YES                                                                                                      | NO                      | Alcohol<br>Cocaine | Cannabis<br>Opioids | Amphet<br>Nicotine         | Heroin<br>Other (Specify) | Metamphet |

|                                                 |                  |     |                                                     |                  |                                                |                      |                          |                      |
|-------------------------------------------------|------------------|-----|-----------------------------------------------------|------------------|------------------------------------------------|----------------------|--------------------------|----------------------|
| <b>I. Medical Illness</b>                       | No               | Yes | If Yes, chose from the following if on history only |                  | If Yes, choose from the following if co-morbid |                      | If HIV                   |                      |
|                                                 |                  |     | HPT                                                 | DM               | HPT                                            | DM                   | On HAART?                | No                   |
|                                                 |                  |     | Epilepsy                                            | HIV              | Epilepsy                                       | HIV                  | If HIV on HAART, Regime? | If HIV, CD4?         |
|                                                 |                  |     | Head Trauma                                         | TB               | Head Trauma                                    | TB                   | If HIV Viral Load?       | Other (specify)      |
|                                                 |                  |     | SLE or Auto/I                                       | Other (specify)  |                                                | Other (specify)      |                          |                      |
| <b>J. Investigations Done</b>                   | <b>CK (u/l)</b>  |     | <b>CK ≤ 200</b>                                     | <b>Fe μmol/l</b> | Fe 9 to 30                                     | <b>VitB12 pmol/l</b> | B12 ≤ 107                | <b>Auto/I Screen</b> |
|                                                 | CK 201 - 1000    |     | CK ≥ 1000                                           | Fe ≤ 9           | Fe ≥ 30                                        | B12 108 - 221        | B12 ≥ 221                | F NF                 |
|                                                 |                  |     |                                                     |                  |                                                |                      |                          |                      |
|                                                 |                  |     |                                                     |                  |                                                |                      |                          | NA SR                |
|                                                 |                  |     |                                                     |                  |                                                |                      |                          |                      |
|                                                 | <b>Endocrine</b> |     | <b>TSH miu/l</b>                                    | ≤ 0.38           | ≥ 5.33                                         | <b>Cortisol</b>      | ≤ 184                    | ≥ 618                |
|                                                 |                  |     | <b>Normal TSH</b>                                   |                  |                                                | <b>Normal (AM)</b>   |                          |                      |
|                                                 |                  |     | 038 to 5.33                                         |                  |                                                | 185 to 617           |                          |                      |
|                                                 |                  |     | <b>T4 pmol/l</b>                                    | ≤ 7.2            | ≥ 16.4                                         | <b>Cortisol (PM)</b> | ≤ 276 (pm)               | ≥ 276                |
|                                                 |                  |     | <b>Normal T4</b>                                    |                  |                                                | ≤ 276                |                          |                      |
|                                                 |                  |     | 7.2 to 16.4                                         |                  |                                                |                      |                          |                      |
| <b>END OF INPATIENT DATA CAPTURING SECTIONS</b> |                  |     |                                                     |                  |                                                |                      |                          |                      |

| <b>J.<br/>Follow-up<br/>Period<br/>ONLY</b>                                                    | <b>1 month</b>                                                                                      | <b>2 months</b>                                                    | <b>3months</b>           | <b>Other</b> |
|------------------------------------------------------------------------------------------------|-----------------------------------------------------------------------------------------------------|--------------------------------------------------------------------|--------------------------|--------------|
| Please tick the applicable box                                                                 | Recurrence of Catatonia?                                                                            | Recurrence of Catatonia?                                           | Recurrence of Catatonia? | Other?       |
|                                                                                                | Re-Admission?                                                                                       | Re-Admission?                                                      | Re-Admission?            | Other?       |
| Please describe (in your own words) your experience/ how you felt during the catatonic episode | Uyacelwa uchaze (ngawakho amazwi) ngamava akho ngexesha ubune catatonia ukuba ingaba ubuziva njani. | <b>PARTICIPANT RESPONSE RECORDED VERBATUM (USE AUDIO RECORDER)</b> |                          |              |

**APPENDIX 2: INFORMED CONSENT FORM INFORMED CONSENT – ENGLISH**

INFORMED CONSENT FOR A STUDY ON CATATONIA

Dear Participant or Relative

We are requesting your consent to enroll you in a study on catatonia and how the symptoms respond to the treatment you are going to be given.

**YES, I AGREE TO BE ENROLLED**

I .....  
agree in **voluntarily** taking part in the study as explained to me by the doctor/ nurse

**OR**

(In cases where the patient is incapable of giving consent but is not opposed to taking part in the study, then a relative or custodian may provide informed consent by also signing below)

I ..... being the .....of  
..... **willingly** agree that he/she may take part in the study which has been explained to us by the doctor/ nurse

Signature of participant/relative/ custodian:

Signed by ..... at ..... on the  
..... of .....2019

**NO, I DO NOT AGREE TO BE ENROLLED**

I .....  
do not agree in taking part in the study as explained to me by the doctor/ nurse OR

I ..... being the .....of  
..... do not agree that he/she may take part in the study which has been  
explained to us by the doctor/ nurse

**Signature of participant/relative/ custodian:**

.....

**FOR OFFICE USE ONLY: ASSESSMENT OF CAPACITY TO CONSENT BASED ON UBACC**

| <i>Does the patient....</i>                                                    |              |              |
|--------------------------------------------------------------------------------|--------------|--------------|
|                                                                                | <i>Yes</i>   | <i>No</i>    |
| <p>1. <i>Understand the information relevant to the decision?</i></p>          | <p>.....</p> | <p>...</p>   |
| <p>2. <i>Retain the information long enough to consider it?</i></p>            | <p>.....</p> | <p>...</p>   |
| <p>3. <i>Weigh the information as part of the decision-making process?</i></p> | <p>.....</p> | <p>...</p>   |
| <p>4. <i>Communicate their decision in some way?</i></p>                       | <p>.....</p> | <p>...</p>   |
|                                                                                | <p>.....</p> | <p>.....</p> |

1  
2  
3  
4 *Please Note: Should there be a no answer to any of the 4 questions above then the patient lacks capacity to*  
5 *consent and a relative or custodian may then be requested to provide informed consent.*  
6  
7  
8

9 **INFORMED CONSENT - ISIXHOSA**

10  
11  
12 **IPHEPHA-MVUME LOPHANDO NGESIGULO SE-CATATONIA**

13  
14  
15  
16 *Mthathi-nxaxheba obekekileyo okanye Mzali okanye sizalwane esibekileyo*

17  
18  
19  
20 Sicela imvume yakho yokuphanda nzulu ngeempawu zesi sigulo i-catatonia, nokuba unyango  
21 ozakulufumana luzakusebenzela njani na.

22  
23 Ndiye ndanikwa iphepha elichaza ngolu phando kwaye ndiluchazelwe ngu  
24 .....

25  
26  
27  
28  
29  
30 **EWE NDIYAVUMA**

31  
32  
33 Mna (faka igama lakho apha) .....  
34 ndiyazikhethela ukulungenela olu phando ndiluchazelwe ngugqirha okanye umongikazi, kwaye  
35 andinyanzeliswanga.  
36  
37

38 **OKANYE**

39  
40  
41  
42 Ukuba umntu akakwazi ukunika imvume ngasizathu sithile, kodwa abe engali ukulungenela  
43 uphando, kungatyikitya umzali okanye isizalwane

44 Isayinwe ngu..... e..... ngomhla we.....  
45  
46 kwinyanga ye .....ku 2019  
47  
48  
49

50  
51 **HAYI NDIKHETHA UKUNGALUNGENELI OLU PHANDO**

52 Mna (faka igama lakho apha) ..... ndikhetha ukuba ndingalungeni olu phando  
53 ndiluchazelwe ngugqirha okanye umongikazi

54 Mna ndingu.....(Chaza uhlobene njani nomthathi-nxaxheba)  
55 ka.....(igama lomthathi nxaxheba)  
56  
57  
58  
59  
60

Isaynwe e..... ngomhla we..... kwinyanga ye.....ku  
2019

Utyikitya apha wena okanye umzali okanye isizalwane

**FOR OFFICE USE ONLY: ASSESSMENT OF CAPACITY TO CONSENT BASED ON UBACC**

| <i>Does the patient....</i>                                             | <i>Yes</i> | <i>No</i> |
|-------------------------------------------------------------------------|------------|-----------|
| <i>1. Understand the information relevant to the decision?</i>          | .....      | ...       |
| <i>2. Retain the information long enough to consider it?</i>            | .....      | ...       |
| <i>3. Weigh the information as part of the decision-making process?</i> | .....      | .....     |
| <i>4. Communicate their decision in some way?</i>                       | .....      | ...       |
|                                                                         | .....      | .....     |

*Please Note: Should there be a no answer to any of the 4 questions above then the patient lacks capacity to consent and a relative or custodian may then be requested to provide informed consent.*



## APPENDIX 3: INFORMATION LEAFLETS IN ENGLISH AND XHOSA

### 3.1 - INFORMATION LEAFLET (XHOSA)

#### **Iphepha lokwazisa umthathi-nxaxheba kuphando lwesigulo i-Catatonia**

Mthathi-nxaxheba obekekileyo      *okanye*      Mzali okanye sizalwane esibekekileyo

Ngale ncwadi sikwazisa malunga ngophando nzulu oluqhutywa ziinzululwazi ezifuna ukufunda nzulu ngesigulo ekuthiwa yi-catatonia kweli ziko lempilo. Unyango obuhleli uzakulufumna alusayi kutshintsha okanye luphazamiseke wakuthatha inxaxheba kolu phando.

#### **Yintoni i-catatonia?**

I-catatonia le sisigulo esiye sibangele ukuphazamiseka kwindlela umntu ashukuma ngayo apha emzimbeni. Kwabanye abantu sibangela ukuba umzimba lo ucothe kakhulu okanye ungakwazi kushuma, umntu azive eqinile, athi nokuba uyafuna ukushumisa umzimba wakhe njengesiqhelo ungakwazi. Ide ibangele loo nto ngelinye ixesha ukuba umntu aphelele ehleli ndawoninye okanye emile ndawoninye de kugqithe imizuzu emininzi okanye iiyure zibe liqela. Iyakwazi nokubangela ukuba umntu ungakwazi ukuphuma kwasebhedini, ungakwazi kuzityisa, ungakwazi kuzihlamba, asoloko elele ebhedini okanye ehleli esitulweni.

Kwelinye icala i-catatonia iyakwazi ukubangela ukuba umntu athi ngoku sele eqalile ukushukuma esithi wenza into ethile, suka umzimba lo uqine, aphelele amalungu omzimba afana neengalo, izandla, imilenze okanye iinyawo zilenga emoyeni ungakwazi ukuyigqibezela laa nthsukumo ebeyiqalile. Intamo nentloko nazo ziyakwazi ukuphetha zikekele ngenxa yoku kuqina komzimba kuvela ngesiquphe.

Okokugqibela, i-catatonia iyakwazi ukuphinda ibangele intshukumo engaphaya kunesiqhelo, aphelele umntu eshuku-shukuma kakhulu, angahlali ndawonye okanye angazinzi. Abanye baye bazule ndawoninye, abanye baqhawabe izandla unomphelo okanye banqwale kungenjalo baninike intloko into engapheliyo. Iyakwazi nokubela ngokuba omnye umntu abetha-bethe amanqindi emoyeni, omnye athi nokuba usebhedini kube ngathi unyomfa ibhaysikili into engapheliyo. Babakhona nabaphetha bethetha into enye, okanye benze isikhalo esiphindaphindwayo okanye nayiphina intsholo abaye bayiqhube imizuzu emininzi okanye iiyure zide zibe liqela. Bakhona ke nabanye abaye balinganise loo nto ithethwa ngumntu ophambi kwabo kungenjalo balinganisa loo nto bayibona isenziwa ngumntu ophambi kwabo.

#### **Ibangelwa yintoni i-catatonia?**

I-catatonia iyakwazi ukubangelwa zizigulo ezithile zengqondo kungenjalo nezinye izigulo zomzimba ziyakwazi ukuhamba ne-catatonia. Ingxaki esiye siyifumane thina boogqirha neenzululwazi kukungazi xa siqala ukumbona umntu onale catatonia ukuba ingaba eyakhe ibangelwa sisigulo sengqondo na okanye sesomzimba kusini na. Yiloo tno side sabona ukuba kungakuhle ukuba sinokuyiphonononga nzulu le ngxaki.

### **Luqulethe ntoni olu phando?**

Sijonge ekubeni wonke umntu oze kulaliswa kweli candelo, ahlolwe, kukhangelwe ukuba akahlaselwanga ziimpawu ezithile zale-catatonia kusini na. Wothi uhlole ngugqirha wakho ebehleli ezakuhlola kakade. Ukuba zikhona iimpawu ezithile ugqirha acinga ukuba uziqaphele apha kuwe, usenakho ukubuza ngazo umzekelo mhlawumbi ukuba ziqale nini, njani, kwaye ingaba uyaqala ukuba nazo na njalonzalo. Uzakube phofu ebhala loo nto umxelela yona. Apha ekubhaleni kwakhe kodwa akazokulibhala igama lakho nokuba ungubani kwaye uhlala phi. Oku kuhlolwa nokubuzwa nge-catatonia kungathatha imizuzu emihlanu ukuya kweli shumi kuphela. Ulwazi esiluloqokelelayo ngawe kukuba nje iimpawu zesi sigulo unazo na kwaye nale mibuzo sesiyikhakanyile kuphela.

Zimbini izinto esifuna ukuziqwalasela kolu phando nge-catatonia:

1. Ingaba bangaphi abantu abafunyanwa sesi sigulo kule ngingqi?

2. Ingaba zikhona izinto ezingunobangela wokuba abanye abantu bafunyanwe sesi sigulo abanye basinde, mhlawumbi njengobubudala bomntu, isini okanye ezinye izigulo zomzimba?

Nayiphi na into esinokuyifunda eyongezelela kulwazi esele sinalo ngesi-sigulo ingasanceda kakhulu ekubeni sikwazi ukusinyanga ngcono kwixa elizayo. Ngako oko ubukho bakho nokuthatha kwakho inxaxheba kolu phando kuya kunceda abantu abaninzi abanokuthi bafunyanwe sesi sigulo.

Alukho olunye uvavanyo oza kulwenza oludibene nolu phando. Naluphi na olunye uvavanyo okanye unyango ozakuthi ulufumane emva kokuba umongikazi okanye ugqirha egqibile ukukuhlola, lunyango lwesiqhelo obuhleli uzakulufumana kakade kugirha wakho.

### **Ukuba ndifunyaniswe ndinazo imipawu ze-catatonia loo nto ithetha ukuthini?**

Ukuba ufunyaniswe unazo ezinye zezi mpawu ze-catatonia, ugqira wakho wokunika unyango lakho lwesiqhelo okanye enze uvavanyo ebehleli ezakulwenza kakade olunxulumene nempilo yakho.

### **Kuza kwenziwa ntoni ngeziphumo zolu phando?**

Iziphumo zolu phando zizakudityaniswa zibhalwe kufndiswe abanye oogqirha neenzululwazi malunga nesi sigulo, kwiinkomfa zoogqirha neenzululwazi.

### **Ndithini ukuba ndinemibuzo?**

Ukuba unemibuzo ngolu phando, cela ukuthetha nogqirha wakho okanye umongikazi ozakube encedisa kolu phando.

### **Siyabulela!**

Sibulela kakhulu ngexesha lakho nokuzixhesha kwakho ngolu phando.

## **3.2 - INFORMATION LEAFLET (ENGLISH)**

### **Information Leaflet about a Study of Catatonia**

Dear Participant / Parent/ Relative

This leaflet is provided to inform you about a study being conducted by researchers who would like to investigate a condition called catatonia at his health facility. The usual care you were going to get will not be changed or disturbed through taking part in this study.

#### **What is catatonia?**

Catatonia is a condition that affects the way a person moves his whole body or body parts. In some people it slows down the body considerably to the point where some will stop moving completely, causing the person to feel very stiff such that they are unable to move even when they want to. This may lead to a person remaining in one position for a very long time (whether sitting or standing) to the point of many minutes or even hours. It can even cause some people to be bedridden, unable to feed themselves, or wash or attend to other daily needs.

Catatonia can also cause a person to appear frozen even after initiating a particular action, resulting in body

1  
2  
3  
4 parts like legs, arms hands or feet being frozen in awkward or unusual looking positions. The head and or  
5 neck may also be tilted at awkward angles. The change in movement can often occur suddenly.  
6  
7  
8

9 Lastly catatonia can also cause an abnormality of excessive movement which is more than normal. A  
10 person may show excessive movement that lasts up to many minutes or hours with a seeming inability to  
11 stay still. Some people may pace up and down, others may clap or wave for long periods lasting minutes to  
12 hours, while others may show head nodding, head shaking, grimacing, etc. Some people have been seen to  
13 do shadow boxing or cycling movements even when lying down. It may also appear as repetitive speech of  
14 the same phrase, a cry or shout or other odd sound that can last for hours. Others may repeat what they hear  
15 around them non- stop or they may mimic actions of those around them as well.  
16  
17  
18  
19  
20

### 21 **What causes catatonia?**

22  
23  
24

25 Catatonia may be seen with a number of mental illnesses but it can also be associated with some other  
26 medical conditions. The problem we run into as doctors is when a person presents with the first time with  
27 this syndrome it may be difficult in the beginning to know what the underlying cause is i.e. whether the  
28 cause is a mental condition or another medical condition. This is why conducting research on catatonia is  
29 so important.  
30  
31  
32  
33  
34

### 35 **What does this research involve?**

36

37 We are looking at ensuring that everybody who is admitted into this unit is examined and screened for  
38 symptoms and signs of catatonia. Your admitting doctor will examine you as usual, which will include an  
39 initial screen for catatonia through examination only. Following this, a trained research assistant who is a  
40 nurse will proceed to do a full screen using a rating scale, to ensure that no other signs of catatonia were  
41 missed. If the research assistant finds any additional signs of catatonia, they will tell your treating doctor. In  
42 addition, the nurse may ask you questions like when did the symptoms start and how fast did they appear  
43 etc. She or he will note down your answers but will not include details like your name or your address which  
44 can identify who you are. This further screening by the nurse not expected to take longer than 5 to 10  
45 minutes. The information to be collected for the study about your condition is about the signs and  
46 symptoms and the few questions already mentioned to do with the illness, nothing more. There are two  
47 questions we would like to investigate about catatonia:  
48  
49  
50  
51  
52  
53  
54

- 55 1. How many people experience this condition in this area?  
56  
57  
58  
59  
60

1  
2  
3  
4  
5  
6 2.Are there particular characteristics that make some people more prone to it and others less  
7 vulnerable to it like age, gender or other medical conditions?

8  
9 Whatever we can learn about this condition, over and above what we know already will help us to come up  
10 with improved ways to diagnose it and to treat it in future. Taking part in this research will therefore help  
11 many people in future who may also get this illness.  
12  
13  
14  
15

16 There are no other tests you will be expected to take part in for this study. Whatever other tests or treatment  
17 interventions that follow will be those that your doctor would have undertaken anyway to help you manage  
18 your condition and get you better.  
19  
20  
21  
22

### 23 **If I am found to show some of the symptoms or signs of catatonia what does that mean?**

24  
25  
26 If you are found to have some signs and symptoms of catatonia, the research nurse will inform your treating  
27 doctor, so that your doctor can give you the appropriate and usual treatment for your condition. Your doctor  
28 may also decide to do more tests which would be what they would have done anyway even if you were not  
29 part of the study, in order to manage your condition.  
30  
31  
32  
33  
34

### 35 **What will be done with the results of the study?**

36  
37 The results of the study will be collected and put together to present to scientific congresses so that other  
38 doctors and scientists can learn from them.  
39  
40  
41

### 42 **What should I do if I have more questions?**

43  
44 If you have more questions, ask your treating doctor or the researcher, research assistant or nurse.  
45  
46

### 47 **Thank you!**

48  
49 Thank you very much for your patience and for spending the few minutes on this study.  
50  
51  
52  
53  
54  
55  
56  
57  
58  
59  
60

**APPENDIX 4: INSTITUTIONAL PERMISSIONS –DORA NGINZA HOSPITAL**

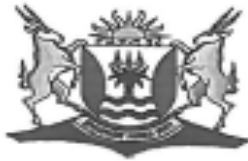

Province of  
**EASTERN CAPE**  
HEALTH

**DORA NGINZA REGIONAL HOSPITAL**

DEPARTMENT OF PSYCHIATRY & MENTAL HEALTH UNIT  
Spenix Street - Zerde - Port Elizabeth - 6205.  
Private Bag X 11851 - Port Elizabeth - 6005  
Telephone +27 41 405 4390 • Fax +27 41 405 4097

**DEPARTMENT OF PSYCHIATRY REQUEST FOR CEO APPROVAL OF DEPARTMENTAL RESEARCH**

|         |                                                                                |
|---------|--------------------------------------------------------------------------------|
| To      | Mr P Tsibolane<br>Chief Executive Officer<br>Dora Nginza Hospital              |
| From    | Dr A Bronkhorst, Prof S van Wyk and Prof Z Zingela<br>Department of Psychiatry |
| Subject | DEPARTMENT OF PSYCHIATRY REQUEST FOR CEO APPROVAL OF DEPARTMENTAL RESEARCH     |
| Date    | 08 November 2018                                                               |

**Introduction**

The Department of Psychiatry and Walter Sisulu University have identified research projects in catatonia as a priority for the Eastern Cape due to the severity of the illness and the potentially negative outcomes resulting from delay in recognition of the cognition

**Requested support**

CEO approval and support for the research project on Catatonia: "Catatonia as a manifestation of serious mental illness: prevalence, presentation, management and outcomes in a mental health unit", is hereby requested on behalf of the investigators to initiate this study in the Department of Psychiatry in Dora Nginza Hospital.

**Conclusion**

This project is also expected to yield support for other ongoing and planned registrar research projects on Catatonia. Thank you for considering this request.

A Bronkhorst

S van Wyk

Z Zingela

The request for approval is hereby **granted / not granted** (please delete as appropriate)

Signature: Designation: CEO Date: 08.11.18

Name: M. P. TSIBOLANE

Dora Nginza Regional Hospital  
Chief Executive Officer  
Mr M.P. Tsibolane

Signature: .....  
Date: .....

## APPENDIX 5: INSTITUTIONAL PERMISSIONS

### APPROVAL FROM EC HEALTH RESEARCH COMMITTEE

#### APPENDIX VI

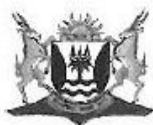

Eastern Cape Department of Health

Enquiries: Madoda Xokwe  
 Date: 19 December 2017  
 e-mail address: madoda.xokwe@echealth.gov.za

Tel No: 040 808 0710  
 Fax No: 043 642 1409

Dear Prof. Z. Zingela

**Re: Catatonia As A Presentation For Severe Mental Illness: Prevalence Of Catatonia In Two Mental Health Units In Urban And Rural South Africa (EC\_201712\_015)**

The Department of Health would like to inform you that your application for conducting a research on the abovementioned topic has been approved based on the following conditions:

1. During your study, you will follow the submitted protocol with ethical approval and can only deviate from it after having a written approval from the Department of Health in writing.
2. You are advised to ensure, observe and respect the rights and culture of your research participants and maintain confidentiality of their identities and shall remove or not collect any information which can be used to link the participants.
3. The Department of Health expects you to provide a progress on your study every 3 months (from date you received this letter) in writing.
4. At the end of your study, you will be expected to send a full written report with your findings and implementable recommendations to the Epidemiological Research & Surveillance Management. You may be invited to the department to come and present your research findings with your implementable recommendations.
5. Your results on the Eastern Cape will not be presented anywhere unless you have shared them with the Department of Health as indicated above.

Your compliance in this regard will be highly appreciated.

SECRETARIAT: EASTERN CAPE HEALTH RESEARCH COMMITTEE

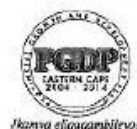

APPENDIX 6:

CATATONIA RATING SCALE

APPENDIX VII

**BUSH-FRANCIS CATATONIA RATING SCALE**

Use presence or absence of items 1-14 for screening  
Use the 0-3 scale for items 1-23 to rate severity

|                                                                                                                                                                                                                                                                                                                                                                  |                                                                                                                                                                                                                                                                                                                                                                      |
|------------------------------------------------------------------------------------------------------------------------------------------------------------------------------------------------------------------------------------------------------------------------------------------------------------------------------------------------------------------|----------------------------------------------------------------------------------------------------------------------------------------------------------------------------------------------------------------------------------------------------------------------------------------------------------------------------------------------------------------------|
| <p><b>1. Excitement:</b></p> <p>Extreme hyperactivity, constant motor unrest which is apparently non-purposeful. Not to be attributed to akathisia or goal directed agitation</p> <p>0 = Absent<br/>1 = Excessive motion<br/>2 = Constant motion, hyperkinetic without rest periods<br/>3 = Full-blown catatonic excitement, endless frenzied motor activity</p> | <p><b>2. Immobility/stupor:</b></p> <p>Extreme hypoactivity, immobile, minimally responsive to stimuli</p> <p>0 = Absent<br/>1 = Sits abnormally still, may interact briefly<br/>2 = Virtually no interaction with external world<br/>3 = Stuporous, non-reactive to painful stimuli</p>                                                                             |
| <p><b>3. Mutism:</b></p> <p>Verbally unresponsive or minimally responsive</p> <p>0 = Absent<br/>1 = Verbally unresponsive to majority of questions; incomprehensible whisper<br/>2 = Speaks less than 20 words/ 5 min<br/>3 = No speech</p>                                                                                                                      | <p><b>4. Staring:</b></p> <p>Fixed gaze, little or no visual scanning of environment, decreased blinking.</p> <p>0 = Absent<br/>1 = Poor eye contact, repeatedly gazes less than 20 seconds between shifting of attention; decreased blinking<br/>2 = Gaze held longer than 20 seconds, occasionally shifts attention<br/>3 = Fixed gaze, non-reactive</p>           |
| <p><b>5. Posturing/catalepsy:</b></p> <p>Spontaneous maintenance of posture(s), including mundane (e.g. setting or standing for long periods without reacting).</p> <p>0 = Absent<br/>1 = Less than 1 minute<br/>2 = Greater than one minute, less than 15 minutes<br/>3 = Bizarre posture, or mundane maintained more than 15 minutes</p>                       | <p><b>6. Grimacing:</b></p> <p>Maintenance of odd facial expressions.</p> <p>0 = Absent<br/>1 = Less than 10 seconds<br/>2 = Less than 1 minute<br/>3 = Bizarre expression(s) or maintained more than 1 minute</p>                                                                                                                                                   |
| <p><b>7. Echopraxia/echolalia:</b></p> <p>Mimicking of examiner's movements/speech.</p> <p>0 = Mimicking of examiner's movements/speech<br/>1 = Occasional<br/>2 = Frequent<br/>3 = Constant</p>                                                                                                                                                                 | <p><b>8. Stereotypy:</b></p> <p>Repetitive, non-goal-directed motor activity (e.g. finger-play, repeatedly touching, patting or rubbing self); abnormality not inherent in act but in frequency.</p> <p>0 = Absent<br/>1 = Occasional<br/>2 = Frequent<br/>3 = Constant</p>                                                                                          |
| <p><b>9. Mannerisms:</b></p> <p>Odd, purposeful movements (hopping or walking tiptoe, saluting passers-by or exaggerated caricatures of mundane movements); abnormality inherent in act itself.</p> <p>0 = Absent<br/>1 = Occasional<br/>2 = Frequent<br/>3 = Constant</p>                                                                                       | <p><b>10. Verbigeration:</b></p> <p>Repetition of phrases or sentences (like a scratched record).</p> <p>0 = Absent<br/>1 = Occasional<br/>2 = Frequent<br/>3 = Constant</p>                                                                                                                                                                                         |
| <p><b>11. Rigidity:</b></p> <p>Maintenance of a rigid position despite efforts to be moved, exclude if cog-wheeling or tremor present.</p> <p>0 = Absent<br/>1 = Mild resistance<br/>2 = Moderate<br/>3 = Severe, cannot be repositioned</p>                                                                                                                     | <p><b>12. Negativism:</b></p> <p>Apparently motiveless resistance to instructions or attempts to move/examine patient. Contrary behavior, does exact opposite of instruction</p> <p>0 = Absent<br/>1 = Mild resistance and/or occasionally contrary<br/>2 = Moderate resistance and/or frequently contrary<br/>3 = Severe resistance and/or continually contrary</p> |
| <p><b>13. Waxy Flexibility:</b></p> <p>During repositioning of patient, patient offers initial resistance before allowing himself to be repositioned, similar to that of a bending candle.</p> <p>0 = Absent<br/>3 = Present</p>                                                                                                                                 | <p><b>14. Withdrawal:</b></p> <p>Refusal to eat, drink and/or make eye contact.</p> <p>0 = Absent<br/>1 = Minimal PO intake/interaction for less than 1 day<br/>2 = Minimal PO intake/interaction for more than 1 day<br/>3 = No PO intake/interaction for 1 day or more.</p>                                                                                        |



## BUSH-FRANCIS CATATONIA RATING SCALE (CONT.)

|                                                                                                                                                                                                                                                                                                                                |                                                                                                                                                                                                                                                                                                        |
|--------------------------------------------------------------------------------------------------------------------------------------------------------------------------------------------------------------------------------------------------------------------------------------------------------------------------------|--------------------------------------------------------------------------------------------------------------------------------------------------------------------------------------------------------------------------------------------------------------------------------------------------------|
| <p><b>15. Impulsivity:</b></p> <p>Patient suddenly engages in inappropriate behavior (e.g. runs down hallway, starts screaming or takes off clothes) without provocation. Afterwards can give no, or only a facile explanation.</p> <p>0 = Absent<br/>1 = Occasional<br/>2 = Frequent<br/>3 = Constant or not redirectable</p> | <p><b>16. Automatic obedience:</b></p> <p>Exaggerated cooperation with examiner's request or spontaneous continuation of movement requested.</p> <p>0 = Absent<br/>1 = Occasional<br/>2 = Frequent<br/>3 = Constant</p>                                                                                |
| <p><b>17. Mitgehen:</b></p> <p>"Anglepoise lamp" arm raising in response to light pressure of finger, despite instruction to the contrary.</p> <p>0 = Absent<br/>3 = Present</p>                                                                                                                                               | <p><b>18. Gegenhalten:</b></p> <p>Resistance to passive movement which is proportional to strength of the stimulus, appears automatic rather than willful.</p> <p>0 = Absent<br/>3 = Present</p>                                                                                                       |
| <p><b>19. Ambitendency:</b></p> <p>Patient appears motorically "stuck" in indecisive, hesitant movement.</p> <p>0 = Absent<br/>3 = Present</p>                                                                                                                                                                                 | <p><b>20. Grasp reflex:</b></p> <p>Per neurological exam</p> <p>0 = Absent<br/>3 = Present</p>                                                                                                                                                                                                         |
| <p><b>21. Perseveration:</b></p> <p>Repeatedly returns to same topic or persists with movement.</p> <p>0 = Absent<br/>3 = Present</p>                                                                                                                                                                                          | <p><b>22. Combativeness:</b></p> <p>Usually in an undirected manner, with no, or only a facile explanation afterwards.</p> <p>0 = Absent<br/>1 = Occasionally strikes out, low potential for injury<br/>2 = Frequently strikes out, moderate potential for injury<br/>3 = Serious danger to others</p> |
| <p><b>23. Autonomic abnormality:</b></p> <p>Circle: temperature, BP, pulse, respiratory rate, diaphoresis.</p> <p>0 = Absent<br/>1 = Abnormality of one parameter [excluding pre-existing hypertension]<br/>2 = Abnormality of two parameters<br/>3 = Abnormality of three or more parameters</p>                              | <p><b>TOTAL:</b> _____</p>                                                                                                                                                                                                                                                                             |

Review only

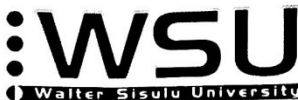

FACULTY OF HEALTH SCIENCES  
 POSTGRADUATE EDUCATION, TRAINING, RESEARCH AND ETHICS UNIT

**HUMAN RESEARCH COMMITTEE  
 CLEARANCE CERTIFICATE**

PROTOCOL NUMBER : 067/2017

PROJECT : PREVALENCE OF CATATONIA IN TWO MENTAL HEALTH UNITS IN URBAN AND RURAL SOUTH AFRICA

INVESTIGATOR(S) : PROF Z ZINGELA

DEPARTMENT : PSYCHIATRY & BEHAVIOURAL SCIENCES

DECISION OF THE COMMITTEE : APPROVED

DATE OF APPROVAL : 07 MAY 2020

DURATION : 1 YEAR (07 MAY 2020 – 07 MAY 2021)

CONDITIONS : NONE

**N.B** You are required to provide the committee with a progress or outcome report of the research after every 6 months. The committee expects a report on any changes in the protocol as well as any untoward events that may occur at any time during the study not later than 7 days of knowing as the investigator/s.

**WALTER SISULU UNIVERSITY**  
 ACADEMIC HEALTH SERVICE COMPLEX OF THE  
 EASTERN CAPE  
 POSTGRADUATE EDUCATION AND TRAINING  
 FACULTY OF HEALTH SCIENCES  
 WALTER SISULU UNIVERSITY  
 P/BAG X 1, WSU, 5117, E.C  
 TEL: (047) 502 2100 / FAX: (047) 502 2101

  
 DR EJ NDEBIA  
 CHAIRPERSON

07.05.2020  
 DATE

**DECLARATION OF INVESTIGATOR(S)**

(To be completed in duplicate and one copy returned to the Research Officer at Office AB 02 GF 03 Administration Building, Sisson Street Campus, Fort Gale, Mthatha, WSU)

I/We fully understand the conditions under which I am/we are authorized to carry out the abovementioned research and I/we guarantee to ensure compliance with these conditions. Should any departure to be contemplated from the research procedure as approved I/we undertake to resubmit the protocol to the Research Ethics Committee. I/We agree to a completion of a 6-monthly/ yearly progress report. The committee reserves the right to withdraw approval in the event that there are serious ethical violations.

..... (Signature)

..... (Date)

N. B. Please quote the protocol number in all enquiries.

1  
2  
3  
4  
5  
6  
7  
8  
9  
10  
11  
12  
13  
14  
15  
16  
17  
18  
19  
20  
21  
22  
23  
24  
25  
26  
27  
28  
29  
30  
31  
32  
33  
34  
35  
36  
37  
38  
39  
40  
41  
42  
43  
44  
45  
46  
47  
48  
49  
50  
51  
52  
53  
54  
55  
56  
57  
58  
59  
60

For peer review only

# BMJ Open

## A Protocol for a Prospective Descriptive Prevalence Study of Catatonia in an Acute Mental Health Unit in Urban South Africa

|                                 |                                                                                                                                                                                                                                                                                                                                                                                              |
|---------------------------------|----------------------------------------------------------------------------------------------------------------------------------------------------------------------------------------------------------------------------------------------------------------------------------------------------------------------------------------------------------------------------------------------|
| Journal:                        | <i>BMJ Open</i>                                                                                                                                                                                                                                                                                                                                                                              |
| Manuscript ID                   | bmjopen-2020-040176.R1                                                                                                                                                                                                                                                                                                                                                                       |
| Article Type:                   | Protocol                                                                                                                                                                                                                                                                                                                                                                                     |
| Date Submitted by the Author:   | 03-Sep-2020                                                                                                                                                                                                                                                                                                                                                                                  |
| Complete List of Authors:       | Zingela, Zukiswa; Walter Sisulu University, Psychiatry and Human Behavioural Sciences; Walter Sisulu University, Dr. Stroud, Louise; Nelson Mandela University, Psychology<br>Cronje, Johan; Nelson Mandela Metropolitan University, Psychology<br>Fink, Max; Stony Brook University, Psychiatry<br>Van Wyk, Stephanus ; Walter Sisulu University, Psychiatry and Human Behavioural Sciences |
| <b>Primary Subject Heading</b>: | Mental health                                                                                                                                                                                                                                                                                                                                                                                |
| Secondary Subject Heading:      | Mental health, Neurology                                                                                                                                                                                                                                                                                                                                                                     |
| Keywords:                       | Neurology < INTERNAL MEDICINE, Adult psychiatry < PSYCHIATRY, MENTAL HEALTH, Child & adolescent psychiatry < PSYCHIATRY                                                                                                                                                                                                                                                                      |
|                                 |                                                                                                                                                                                                                                                                                                                                                                                              |

SCHOLARONE™  
Manuscripts



I, the Submitting Author has the right to grant and does grant on behalf of all authors of the Work (as defined in the below author licence), an exclusive licence and/or a non-exclusive licence for contributions from authors who are: i) UK Crown employees; ii) where BMJ has agreed a CC-BY licence shall apply, and/or iii) in accordance with the terms applicable for US Federal Government officers or employees acting as part of their official duties; on a worldwide, perpetual, irrevocable, royalty-free basis to BMJ Publishing Group Ltd ("BMJ") its licensees and where the relevant Journal is co-owned by BMJ to the co-owners of the Journal, to publish the Work in this journal and any other BMJ products and to exploit all rights, as set out in our [licence](#).

The Submitting Author accepts and understands that any supply made under these terms is made by BMJ to the Submitting Author unless you are acting as an employee on behalf of your employer or a postgraduate student of an affiliated institution which is paying any applicable article publishing charge ("APC") for Open Access articles. Where the Submitting Author wishes to make the Work available on an Open Access basis (and intends to pay the relevant APC), the terms of reuse of such Open Access shall be governed by a Creative Commons licence – details of these licences and which [Creative Commons](#) licence will apply to this Work are set out in our licence referred to above.

Other than as permitted in any relevant BMJ Author's Self Archiving Policies, I confirm this Work has not been accepted for publication elsewhere, is not being considered for publication elsewhere and does not duplicate material already published. I confirm all authors consent to publication of this Work and authorise the granting of this licence.

1  
2  
3  
4  
5  
6 **A Protocol for a Prospective Descriptive Prevalence Study of Catatonia in an Acute**  
7  
8 **Mental Health Unit in Urban South Africa**  
9

10 Zukiswa Zingela,<sup>1</sup> Louise Stroud,<sup>2</sup> Johan Cronje,<sup>2</sup> Max Fink,<sup>3</sup> Stephan van Wyk<sup>1</sup>  
11  
12  
13  
14

15 **Author Affiliations**  
16

17 <sup>1</sup>Department of Psychiatry and Human Behavioural Science, Walter Sisulu University,  
18 Mthatha, South Africa  
19

20 <sup>2</sup>Department of Psychology, Nelson Mandela University, Port Elizabeth, South Africa  
21

22 <sup>3</sup>Department of Psychiatry, Stony Brook University, New York, United States of America  
23  
24  
25  
26  
27  
28

29 Word Count: 4409  
30  
31  
32  
33  
34

35 **Corresponding author**  
36

37  
38 Zukiswa Zingela: email: [zzingela@wsu.ac.za](mailto:zzingela@wsu.ac.za), Postnet Suite 274, Private Bag X13130,  
39 Humewood, 6013, South Africa  
40  
41

42  
43 Tel +2747-502-1977  
44  
45

46 ORCID: 0000000234251145  
47  
48  
49  
50

51 **ABSTRACT**  
52  
53  
54  
55

56 **Introduction**  
57  
58  
59  
60

1  
2  
3 Catatonia arises from serious mental, medical, neurological, or toxic conditions. The  
4 prevalence range depends on the setting and the range is anything from 7% to 63% percent in  
5 other countries. South African prevalence rates are currently unknown. The proposed study is  
6 a quantitative descriptive study utilising the Bush Francis Catatonia Screening Instrument as a  
7 screening tool with a data capturing information sheet to extract clinical information from  
8 patient folders. The study will investigate: 1) prevalence of catatonia, 2) clinical and  
9 demographic correlates associated with catatonia, 3) predictors of catatonia, 4) response to  
10 treatment, and 5) subjective experience of catatonia.  
11  
12  
13  
14  
15  
16  
17  
18  
19  
20  
21

### 22 **Methods and analysis**

23  
24 The setting is an acute mental health unit (MHU) within a regional, general medical hospital  
25 in Nelson Mandela Bay, South Africa which accepts referrals from within the hospital and from  
26 outlying clinics. Participants will be recruited from inpatients in the MHU from beginning of  
27 September 2020 to end of August 2021. Most admissions are involuntarily, under the Mental  
28 Health Care Act of 2002 with an age range of 13 to over 65 years. Participants who screen  
29 positive for catatonia will be followed up after discharge for three months to measure outcomes.  
30 Primary outcomes will include the 12-month prevalence rate of catatonia, descriptive and other  
31 data on presentation and assessment of catatonia in the MHU.  
32  
33  
34  
35  
36  
37  
38  
39  
40  
41

42 Secondary outcomes will include data on treatment response, participants' report of their  
43 subjective experience of catatonia and predictors of catatonia.  
44  
45  
46

47 Descriptive statistics, multivariate binomial logistic regression, and univariate analyses will be  
48 conducted to evaluate associations between catatonia and clinical or demographic data which  
49 could be predictors of catatonia. Survival analysis will be used to examine the time to recovery  
50 after diagnosis and initiation of treatment. The 95% confidence interval will be used to  
51 demonstrate the precision of estimates. The level of significance will be  $p \leq .05$ .  
52  
53  
54  
55  
56  
57  
58  
59  
60

## Ethics and dissemination

The study has received ethical approval from the Research and Ethics Committees of the Eastern Cape Department of Health, Walter Sisulu University and Nelson Mandela University. The results will be disseminated as follows: at various presentations and feedback sessions; as part of a Ph.D. thesis in Psychology at Nelson Mandela University; and in a manuscript that will be submitted to a peer-reviewed journal.

Keywords: *Catatonia, assessment, screening tool, Bush Francis Catatonia Rating Scale, predictors*



## Article Summary

### Strengths and limitations of this study

- This is the first study to examine the prevalence of catatonia in South Africa and aims to address the lack of data on prevalence rates of catatonia, presentation, optimal management, predictors, and outcomes in this setting.
- The triangulation of information sources like the Bush Francis Catatonia Rating Scale, a validated catatonia screening tool, clinical notes, and subjective reports of catatonic episodes from the participants present a unique opportunity to investigate different aspects of catatonia.
- The descriptive nature of the study and the limited number of participants could limit the applicability of significant associations between variables regarding cause and effect and the generalisability of findings. The heterogenous nature of catatonia and interrater reliability of catatonia screening instruments are another source of potential limitations of the study.

## INTRODUCTION

In the 1880s, Kraepelin described the prevalence of catatonia as close to 20% in 500 cases.[1] Modern-day studies show a range from less than 10% to 63%.[1, 2, 3] Catatonia is often treated by psychiatrists, even though underlying causes may be other medical conditions such as neurological, infectious, endocrine, and substance-induced disorders.[1] Grover et al.[4] described close to 40% of 205 patients who had delirium and two or more catatonic symptoms on the Bush Francis Catatonia Rating Scale (BFCRS).

1  
2  
3 Luchini et al.[5] characterised catatonia as an autonomous syndrome, frequently  
4 associated with mood disorders but also observed in patients with other conditions including  
5 neurological, neurodevelopmental, physical, and toxic conditions. Current evidence has  
6 provided some answers about the categorisation of catatonia, clinical presentations,  
7 interventions, and response to treatment.[5, 6, 7, 8]  
8  
9  
10  
11  
12  
13  
14  
15  
16

17 The current study will investigate the prevalence of catatonia in patients of the Dora  
18 Nginza Hospital (DNH) mental health unit (MHU), associated risk factors and response to  
19 treatment. Due to the prominent role played by electroconvulsive therapy (ECT) in the  
20 treatment of catatonia, the results from this study may have applicability in public mental  
21 health planning, and availability of ECT in public hospitals.[1]  
22  
23  
24  
25  
26  
27  
28  
29  
30  
31  
32

### 33 **Catatonia in South Africa**

34  
35 There are currently no studies describing the prevalence of catatonia in South Africa  
36 (SA), which leaves clinicians blind to the burden of the disease linked to this potentially fatal  
37 syndrome. Clinicians may, therefore, be unaware of the importance of the assessment and  
38 detection of catatonia, leading to missed opportunities to intervene in what is a highly  
39 treatable condition.  
40  
41  
42  
43  
44  
45  
46  
47  
48

49 White and Robins[9] described 17 patients with catatonia in SA who received  
50 antipsychotic medication. There was a deterioration in their clinical presentation into  
51 neuroleptic malignant syndrome (NMS). The risk of precipitating NMS in this case series  
52 was linked to the administration of antipsychotics. This study also challenged the notion of  
53  
54  
55  
56  
57  
58  
59  
60

1  
2  
3 NMS being viewed as a separate condition to catatonia. Since then, catatonia has not been  
4  
5 widely studied in SA, despite the researchers' observation that it continues to present a  
6  
7 significant and sometimes life-threatening challenge. Another study conducted in SA  
8  
9 described the treatment of 42 catatonic patients with ECT.[10] The current study represents  
10  
11 the first stages of aiming to fill the gap in the extant research with a prospective study on  
12  
13 prevalence and predictive data.  
14  
15  
16  
17  
18

### 19 **Prevalence of catatonia in other parts of the world**

20  
21 Fink and Taylor [1] described a rate of catatonia of 10% in acutely ill psychiatric  
22  
23 patients and Stuiivenga and Morrens [2] a rate of 16.9% when applying the DSM-5 criteria.  
24  
25 Conditions found in association with a catatonic presentation have included psychiatric  
26  
27 diagnoses like bipolar disorder, delirious mania, psychotic depression, schizophrenia, and  
28  
29 other medical conditions.[6, 2] In some instances, the cause leading to catatonia has been less  
30  
31 well-defined. DSM-5 has captured the multiple possible associations that occur with catatonia  
32  
33 by including it as a specifier for mood disorders and schizophrenia or as linked to another  
34  
35 medical condition.[11] Catatonia also appears as an entity with undefined aetiology under  
36  
37 'catatonia not otherwise specified'. [8]  
38  
39  
40  
41  
42  
43  
44

### 45 **Choice of screening tool and rating scale**

46  
47 In 1996, Bush et al. designed the Bush Francis Catatonia Screening Instrument  
48  
49 (BFCSI) a 14-item scale for screening for catatonia and a 23-item scale for rating severity of  
50  
51 catatonia.[3, 12] They demonstrated that the scales were reliable and valid tool for diagnosis  
52  
53 and evaluation of response to treatment. The scales have a dual utility of screening and  
54  
55 measurement of the severity of catatonia. A systematic review of seven catatonia rating scales  
56  
57  
58  
59  
60

1  
2  
3 reported a similar finding when comparing the BFCRS with other tools to screen for  
4  
5 catatonia.[13] They recommend the BFCRS for routine use because of ease of use, reliability,  
6  
7 and validity. Wilson et al.[14] found 300 out of 339 patients with acute medical and  
8  
9 psychiatric illness screened positive for catatonia when applying the BFCRS.  
10  
11  
12  
13

14  
15 The BFCRS and BFCRS have been used successfully in the MHU as screening and  
16  
17 rating scales for the past seven years in the MHU which is the site of the current study. Other  
18  
19 reasons supporting the utility of the scales in this study are: 1) the reported ease of use, 2)  
20  
21 reliability, 3) validity as both a screening tool and a measure of severity, and 4) its use since  
22  
23 2011 in the study site has not yielded any issues with applicability or appropriateness when  
24  
25 used in this clinical setting. Figure 1 reflects the assessment tools and process that will be  
26  
27 applied to assess participant and collect data.  
28  
29  
30  
31  
32

### 33 **Management of catatonia**

34  
35 The biological treatment for catatonia has advanced over the last century, from insulin  
36  
37 coma therapy of the early 1930s and Meduna's use of seizure-inducing camphor oil injections  
38  
39 to Cerletti's first documented use of an electric shock procedure in 1938.[1] Available  
40  
41 evidence on management of catatonia includes the published works from various  
42  
43 researchers.[1, 6, 7, 9,14-19] Lorazepam and ECT are the current recommended treatments,  
44  
45 irrespective of aetiology. They are effective in most cases.[1, 7, 9, 14, 17]  
46  
47  
48

49 In both in the White and Robins[9] and Fricchione et al.[7] case series, intravenous  
50  
51 administration of benzodiazepines (diazepam or lorazepam) was demonstrated as an  
52  
53 efficacious treatment for catatonia. Response is seen relatively rapidly, i.e. within minutes of  
54  
55 administration. Instead of a sedative effect that one observes with the administration of  
56  
57  
58  
59  
60

1  
2  
3 benzodiazepines in non-catatonic patients, those with catatonia tend to ‘wake up’ from stupor  
4  
5 or normalise from a state of extreme excitement. In the White and Robins[9] study, two  
6  
7 patients who did not receive intravenous benzodiazepines died.  
8  
9

10  
11  
12 The dose range used at the study site tends to be higher and is given more frequently  
13  
14 compared to the recommendation in the Rasmussen et al. paper.[19] This is mainly because  
15  
16 patients at the site present at advanced stages of catatonia and tend to respond slowly or not at  
17  
18 all when the lower or less frequent doses are employed.  
19  
20  
21  
22

### 23 24 **The subjective experience of catatonia**

25  
26 Northoff et al.[20] conducted a retrospective study on 24 catatonic patients post-  
27  
28 recovery after a catatonic episode. The patients reported intense emotions which could not be  
29  
30 controlled and ambivalence with less focus on their altered movements. Other descriptions of  
31  
32 catatonia have stated an extreme fear response characterized by freezing, likened to the  
33  
34 defence seen in animals of tonic immobility or freezing in the face of danger.[21]  
35  
36  
37  
38  
39

40 This study will investigate the subjective experience of catatonia as described by  
41  
42 participants once discharged from the hospital, to shed light on the emotive and cognitive  
43  
44 experience of catatonia in the study cohort. This may provide clues on the psychological  
45  
46 drivers of the catatonic response and could pave the way for further research into the  
47  
48 psychology of the catatonic response.  
49  
50  
51  
52

### 53 54 **Aims**

55  
56 This study aims to determine the prevalence of catatonia in an acute mental health  
57  
58  
59  
60

unit in urban South Africa and research its assessment and management in this setting.

## Objectives

The two main research objectives are:

1. Screening of consenting participants admitted to the mental health unit in Dora Nginza Hospital using the BFCSI for catatonia, over a 12-month period from the 1<sup>st</sup> of September 2020 to the end of August 2021, to describe the prevalence of catatonia in this setting.
2. Description of demographic and clinical information, including response to treatment, in participants diagnosed with catatonia based on their BFCSI scores and clinical assessments performed by the admitting doctor.

In addition, significant clinical correlates and risk factors in participants with catatonia will be described, and participants with catatonia will be followed up once discharged at one month, two months, and three months intervals, to assess outcomes using the BFCSI and information about readmission or recurrence of any episode of mental illness. The association that will be looked at is between catatonia and demographic or clinical correlates such as age, gender, DSM 5 diagnosis, substance use, vitamin 12 deficiency and food insecurity and other co-occurring medical conditions. Participant's experience of catatonia once it has resolved will also be described.

## Research design

This is a prospective, descriptive triangulation study utilising mixed quantitative and qualitative methods. An exploratory qualitative aspect will investigate the emotive and

1  
2  
3 cognitive subjective experience of participants with catatonia to establish a direction for  
4  
5 further research. This is because there is currently limited data available on the subjective  
6  
7 experience of catatonia, with most research focusing on quantitative aspects.  
8  
9

10  
11  
12 The quantitative elements of the study will include data collected from participant  
13  
14 files of BFCSI scores upon admission, with additional clinical and demographic information  
15  
16 collected via a pre-designed datasheet. The qualitative element will describe the participant's  
17  
18 reported experience of the catatonic episode, post-discharge.  
19  
20  
21  
22

## 23 24 **METHODS AND ANALYSIS**

25  
26 The study will take a positivist paradigm approach to investigate the potential causal  
27  
28 relationships between catatonia and different variables via correlational studies.[22]  
29  
30 Creswell[23] described the positivist's approach as an attempt to identify causes, which  
31  
32 influence outcomes, the aim being to formulate laws, thus yielding a basis for prediction and  
33  
34 generalisation. In the current study, deductive reasoning will be applied to data collected  
35  
36 through 1) direct observation and 2) quantitative and qualitative approaches, to identify  
37  
38 associations with catatonia, causal relationships, and possibly, predictors of catatonia.[22]  
39  
40  
41  
42  
43  
44  
45  
46

47 Sources of information that will be utilised for triangulation include: the participants'  
48  
49 BFCSI/ BFCRS scores and clinical notes; field notes taken by the research team during direct  
50  
51 observation and interviews; and participant and relative interviews focusing on response to  
52  
53 treatment, food insecurity, and the subjective experience of catatonia. Additionally, the mixed  
54  
55 methods nature of the study will enable the generation of both objective (as documented by  
56  
57  
58  
59  
60

1  
2  
3 treating and research teams) and subjective data regarding the experience of catatonia. This  
4 type of triangulation is an important tool for meeting the goals of this study while facilitating  
5 a holistic assessment of catatonia in this cohort.  
6  
7  
8  
9

### 10 11 12 **The study process and outline**

13  
14 Two research assistants (RAs) with a background in health will be recruited to assist  
15 the researcher with fieldwork. A health background is necessary to understand the medical  
16 terminology that is utilised in the clinical notes and screening tools. A part-time  
17 administrative assistant will be contracted to assist with data capturing and collation.  
18  
19 Fieldwork will include the recruitment of participants and collection of data by the researcher  
20 and RAs. There will be a limited follow-up component that extends to up to three months  
21 following discharge from the hospital.  
22  
23  
24  
25  
26  
27  
28  
29  
30  
31

32  
33 The RAs will be trained by the researcher on:

- 34 1) application of the BFCSI and BFCRS to ensure they are knowledgeable about the  
35 screening tool and its interpretation, and  
36
- 37 2) assessment of capacity to consent utilising the University of California, San Diego  
38 Brief Assessment of Capacity to Consent Questionnaire (UBACC).  
39

40 The UBACC has been applied successfully in the Eastern and Western Cape in study  
41 cohorts recruited from inpatient mental health institutions. [24, 25]  
42  
43  
44

45 The inter-rater reliability (IRR) of the BFCRS was demonstrated to be good ( $\alpha=0.779$ )  
46 in a study looking at four different instruments to assess for catatonia. [26] In the planned  
47 study, training that will be provided by the lead researcher to the RAs on the use of the  
48 BFCRS/BFCRS will be through:  
49  
50  
51  
52  
53  
54  
55  
56  
57  
58  
59  
60



- explaining the meaning of terms used in the BFCSI/BFCRS to describe clinical signs and symptoms of catatonia and
- providing a demonstration of how to elicit and document the 14-items and 23-items in the BFCSI/BFCRS, how to capture the relevant information accurately onto the data capturing form
- ensuring RAs start with practice participants initially under direct observation of the lead researcher, before starting the actual recruitment. An IRR in the range of ( $\alpha=0.61$  to 0.8) during the practice scoring will be deemed acceptable for RAs to proceed to the scoring of study participants.

Inter-rater reliability will also be addressed through ensuring that everyone has a similar understanding of all items to be rated in the screening tool and how these should be recorded.

The researcher and RAs will assess participants who meet the inclusion criteria for capacity to consent, utilising the UBACC. All those with intact capacity to consent will be requested to consider entering the study. For participants who may be assessed as lacking the capacity to consent, their closest relatives or guardians will be requested to consent on their behalf through proxy consent (proxy consent and its ethical application is further discussed in the section 'Ethics and dissemination' below). Additionally, in those assessed to lack capacity to consent, such capacity will be reviewed weekly to allow for further re-engagement on their consent to take part in the study, the ultimate aim being to change from proxy consent to personal consent as soon as potential participants have regained capacity. Data collected about any participant who chooses to withdraw from the study will be removed from the study data sets and destroyed.

1  
2  
3  
4  
5  
6 The research team will collect data from the clinical files of consenting participants  
7  
8 on BFCSI/BFCRS scores and additional descriptive and demographic information as guided  
9  
10 by the study questionnaire and study protocol. The completed data capturing forms will be  
11  
12 submitted to the administrative assistant for data collation and entry into a spreadsheet at the  
13  
14 end of each week. The assessment of new admissions will be daily on weekdays with the  
15  
16 expectation being to conduct daily screening or within the first 48-hours at least. Information  
17  
18 on clinical presentation of patients admitted over weekends will be supplemented from the  
19  
20 clinical folders. In cases where the Researcher or RAs identify possible missed catatonia, the  
21  
22 treating doctor will be provided with any additional information picked up during the  
23  
24 participants' assessment to allow for a review of the patient's clinical case and management.  
25  
26  
27  
28  
29

30  
31 During the limited follow-up period, the researcher and RAs will repeat the BFCSI  
32  
33 assessment and conduct face-to-face interviews with participants regarding their experience  
34  
35 of catatonia at one month, two months, and three months post-discharge. Recurrence of  
36  
37 symptoms or readmissions since the last discharge will be documented. The participant's  
38  
39 willingness to continue with the study will be reviewed during every visit to ensure their  
40  
41 consent remains valid throughout. Figure 2 is a summary of the study process that will be  
42  
43 followed.  
44  
45  
46  
47  
48

### 49 **Setting**

50  
51 The setting will be a 35-bed acute mental health unit in Dora Nginza Hospital, a  
52  
53 general hospital in the Eastern Cape Province in South Africa. The hospital is in Zwide, in the  
54  
55 iBhayi area of Port Elizabeth which has a population of over one million within an urban  
56  
57  
58  
59  
60

1  
2  
3 area that has a high morbidity of mental illness.[27] Close to 70% of the population is  
4  
5 comprised of working age adults between 15 and 64 years and the city has an unemployment  
6  
7 rate of close to 30%. [27] Zwide itself has a population of 238 000. [28] Health services in  
8  
9 the hospital include obstetrics and gynaecology, paediatrics, basic surgical, internal medicine,  
10  
11 and family medicine. The MHU is an acute inpatient unit offering 24-hour care to persons  
12  
13 who present with acute mental illness requiring inpatient treatment. It accepts referrals from  
14  
15 all the other hospital departments including the Accident and Emergency Department, as well  
16  
17 as referrals from primary care clinics and district hospitals in the nearby vicinity. The usual  
18  
19 period of admission ranges anything from three days to a few weeks.  
20  
21  
22

23  
24 All cases of suspected catatonia, from any of the referring departments are discussed  
25  
26 with the MHU team and prioritized for admission into the unit. Any treatment given  
27  
28 thereafter is discussed with the MHU team and documented in the patient's folder.  
29  
30  
31

### 32 33 **Sampling**

34  
35 Convenience sampling of all patients admitted to the MHU over a twelve-month  
36  
37 period (September 2020 to August 2021) will be undertaken. Contact details of all consenting  
38  
39 participants who have screened positive for catatonia will be entered into a database to enable  
40  
41 contact for future follow-up at the end of one month, two months, and three months post-  
42  
43 discharge. This information will be password encrypted.  
44  
45

46  
47 The number of patients expected to be admitted during the study period is around 1000  
48  
49 based on previous unit stats over the last three years and adjusted down slightly to  
50  
51 accommodate the effect of the COVID-19 outbreak on hospital admissions. The margin of  
52  
53 error or confidence interval will be set at 95% and the standard deviation will be set at 0.05.  
54  
55 To determine the total sample size required, the formula:  $n=N/(1+Ne^2)$  will be utilized and  
56  
57

1  
2  
3 yields a minimum sample size of 286 subjects. A further 20% (57) will be added to account  
4  
5 for data entry errors and non-responses. The appropriate sample size of participants to be  
6  
7 screened for the prevalence of catatonia in the unit is 343.  
8  
9

## 10 **Participants**

11  
12 Most people admitted to the DNH MHU are involuntary admissions under the Mental  
13  
14 Health Care Act of 2002.[29] Age of admission ranges from 13 to over 65 years because  
15  
16 there are no child, adolescent, or geriatric inpatient-specific services in the region.  
17  
18  
19  
20  
21

## 22 **Inclusion criteria**

23  
24 All patients admitted to the unit during the study period will be eligible for inclusion.  
25  
26 Those who screen positive for two or more catatonic signs and symptoms on the BFCSI will  
27  
28 be included during the follow-up period for the qualitative part of the study.  
29  
30  
31  
32

## 33 **Exclusion criteria**

34  
35 Refusal to take part in the study, whether through the direct patient consent process or  
36  
37 the proxy consent process, will result in the exclusion of the patient.  
38  
39  
40  
41

## 42 **Methods of assessment and measurement**

43  
44 The BFCSI is a 14-item scale (see Appendix A) that is used to screen for catatonia  
45  
46 and the BFCRS is a 21-item scale used to rate severity.[11] The BFCSI is used on initial  
47  
48 assessment and the full BFCRS is used to determine severity. Participants' responses to the  
49  
50 standard interventions of intravenous lorazepam administration or ECT will be documented  
51  
52 by the admitting doctor in the case notes. The research team will then capture this  
53  
54 information on a predesigned data collection sheet. A 50% reduction in signs and symptoms  
55  
56  
57  
58  
59  
60

1  
2  
3 in response to the treatment intervention represents a response while a 100% reduction is  
4 considered full resolution. When a patient presents with two or more positive items on the  
5 BFCRS, they are deemed catatonic and further management is guided by the unit protocol. A  
6 lorazepam infusion of 1mg or 2 mg is administered and a response of 50% or greater  
7 reduction in the scale score verifies the diagnosis although absence of verification does not  
8 exclude catatonia. The research team will capture information on participant's  
9 BFCRS/BFCRS scores and other clinical data this information on a predesigned data  
10 collection sheet. A 50% reduction in signs and symptoms in response to the treatment  
11 intervention represents a response while a 100% reduction is considered full resolution.  
12  
13  
14  
15  
16  
17  
18  
19  
20  
21  
22  
23

24 The clinical data collection that will be collected include current psychiatric  
25 diagnosis, co-occurring medical conditions, any other treatment administered, history of  
26 substance use, history of previous catatonic episodes, vital signs like temperature on  
27 admission, blood pressure, pulse, investigations like creatinine kinase, iron levels, thyroid  
28 function teste urea and electrolytes or any other relevant clinical investigations reflected in  
29 the file which are noted by the treating team to be of relevance to the current admission., and  
30 food insecurity. The participants' case notes will form a primary source of information as  
31 well as direct observation of the participants. Additional information will be sought from  
32 relatives if the participant is unable to respond adequately to information required on food  
33 security questions due to the severity of catatonic symptoms, or in those who are unable to  
34 provide the additional information for whatever other reason.  
35  
36  
37  
38  
39  
40  
41  
42  
43  
44  
45  
46  
47  
48  
49  
50

51 Regarding social determinants of mental health, current evidence indicates that those  
52 who are poor or disadvantaged suffer disproportionately from common mental disorders and  
53 their adverse consequences.[30] The strength of the association with poverty has at times  
54  
55  
56  
57  
58  
59  
60

1  
2  
3 varied depending on the type of poverty measure used. Food insecurity as a poverty measure  
4 is one of the factors with a consistent and strong association with common mental  
5 disorders.[31] In this study, the administration of a food security questionnaire will be  
6 utilised to assess the correlation of poverty to catatonia. Two food insecurity questions are  
7 drawn from the USDA's 18-question Household Food Security Scale.[32] They make up The  
8 Hunger Vital Sign Questionnaire, a validated two-question food insecurity screening tool  
9 used in the clinical setting. The questions are:

- 19 1. Within the past 12 months, we worried whether our food would run out  
20 before we got money to buy more.
- 21 2. Within the past 12 months, the food we bought just did not last and we did  
22 not have money to get more.

23  
24  
25  
26  
27  
28  
29  
30  
31 During the follow-up period, participants will be asked to describe their experience of  
32 the catatonic episode as well as their perception of recovery.

### 33 34 35 36 37 **Expected outputs**

- 38 • The 12-month prevalence rate of catatonia.
- 39 • Descriptive and other data on presentation and assessment of catatonia in the DNH  
40 unit.
- 41 • Data on treatment response, short-term outcomes, and subjective experience of  
42 catatonia.
- 43 • Predictors for catatonia based on clinical correlates and other descriptive data  
44 collected.
- 45 • Recommendations and guidelines for the management of catatonia and possible

1  
2  
3 prevention strategies.  
4

### 5 **Data management and analysis**

6  
7 Quantitative data collected will be summarised using descriptive statistics.  
8

9  
10 Categorical variables will be presented using frequency tables, percentages, and graphs. Two  
11  
12 or more categorical variables will be compared using contingency tables (e.g. 2 X 2 Table)  
13  
14 and the expected frequencies will be calculated to determine the type of test best suited to  
15  
16 determine the extent of any identified relative associations. If the expected frequencies in all  
17  
18 cells are  $\geq 5$  then the Chi-squared test will be used and if the expected frequencies are  $< 5$  in  
19  
20 any cells, then the Fisher's exact test will be used.  
21  
22  
23  
24  
25

26 Binomial logistic regression will also be conducted to determine the predictors of  
27  
28 catatonia and to estimate the risk ratio. If the numerical data are not normally distributed,  
29  
30 non-parametric statistics will be used (median and interquartile range). The best fitting model  
31  
32 of multivariate analysis will be chosen through forward selection of model building. The  
33  
34 model with the lowest Bayesian information criterion will be selected as the better model and  
35  
36 the 95% confidence interval will be used to estimate the precision of estimates. Survival  
37  
38 analysis will be used to determine the time to recovery and the hazard ratio (i.e. the total  
39  
40 number and timing of each event indicating relapse in this study) will be reported for this  
41  
42 purpose.  
43  
44  
45  
46  
47  
48

49 Qualitative data collated during the follow-up period will be analysed to elucidate the  
50  
51 subjective experience of catatonia in this cohort. Aspects of the thematic analysis presented  
52  
53 by Braun and Clarke [32] will be applied to identify themes. Themes will be identified  
54  
55 through a framework approach identifying word repetition, local expressions, metaphors and  
56  
57  
58  
59  
60

1  
2  
3 similarities, differences, and keywords. A tentative hypothesis and theory regarding the  
4 experience of catatonia will be presented based on emergent themes. Data collected during  
5 the quantitative and qualitative segments of the study will be analysed separately but  
6 compared for congruency of reported information to enhance data integration.  
7  
8  
9  
10  
11  
12  
13  
14

15 In summary, data integration will be in the form of:

- 16  
17 i. converting information gathered from the quantitative aspects of the study into  
18 numerical information that can be processed through application of statistical methods  
19 to test for correlations and associations.  
20  
21  
22
- 23  
24 ii. identifying common themes through field notes taken when interviewing participants  
25 during the outpatient stage of the study.  
26  
27
- 28  
29 iii. Assessing congruency between common themes about the subjective experience of  
30 catatonia as described by participants and commonly identified presenting symptoms  
31 as highlighted in case notes and listed in the data collection sheet. The advantage of  
32 this approach is that it strengthens the validity and reliability of the study.  
33  
34  
35  
36  
37
- 38  
39 iv.

#### 40 **Patient and public involvement**

41  
42 No formal patient advisory committee was set up. The research was developed after  
43 the researchers noted mostly young patients in their mid-30's of less being admitted to the  
44 study site with catatonia. Some patients presenting with catatonia wanted to know why some  
45 people present with catatonia while others do not and whether there were risk factors that  
46 could indicate those who were susceptible. Patients who had recovered from catatonia also  
47 seemed to indicate varying experiences of the catatonic state. The observational descriptive  
48 nature of the sign was to ensure that data is collected in "real life" terms, such that if the  
49  
50  
51  
52  
53  
54  
55  
56  
57  
58  
59  
60



1  
2  
3 study reveals limitations in the resources for managing catatonia at the site, then the results  
4  
5 could be used to motivate for proper resourcing of the health facility to improve care of those  
6  
7 with catatonia.  
8  
9

## 10 11 12 **ETHICS AND DISSEMINATION** 13

14  
15 Ethics clearance has been granted for the study by the Eastern Cape Department of  
16  
17 Health Ethics Committee, the Walter Sisulu University Research and Ethics Committee and  
18  
19 the Nelson Mandela University Human Research Ethics Committee. The study does not have  
20  
21 any intervention arm.  
22  
23

24  
25  
26 All patients admitted to the unit will be presented with an information leaflet on the  
27  
28 study in English or Xhosa. Consent for inclusion in the study will be obtained from all  
29  
30 participants who have the capacity to consent, which will be determined through application  
31  
32 of the UBACC. Proxy consent will be sought from a relative or guardian for all patients who  
33  
34 lack the capacity to consent or are minors between the ages of 13 and 18 years of age. The  
35  
36 use of proxy consent in mental health research is applicable for those who lack the capacity to  
37  
38 consent and the nearest relative or guardian consents on their behalf. It is permissible within  
39  
40 the mental health care setting due to the challenges with capacity to consent that may exist in  
41  
42 patients with acute mental illness.[33] Proxy consent ensures that respondents' rights are  
43  
44 guarded while making it possible to include individuals or groups who may potentially  
45  
46 benefit from scientific advances gained from research. This approach is also supported by the  
47  
48 Helsinki Declaration on ethical research which states that 'for a research subject who is  
49  
50 legally incompetent, physically or mentally incapable of giving consent or is a legally  
51  
52 incompetent minor, the investigator must obtain informed consent from the legally authorised  
53  
54  
55  
56  
57  
58  
59  
60

1  
2  
3 representative in accordance with applicable law'.[34] The Department of Health Guidelines  
4  
5 on ethics in health research similarly state that persons should not be excluded unfairly based  
6  
7 on discrimination or disability.[35]  
8  
9

10  
11  
12 The Mental Health Care Act (MHCA) of 2002 also makes a reference as to whom  
13  
14 may be considered an associate of a patient admitted under the Mental Health Care Act: e.g. a  
15  
16 spouse, next of kin, partner, associate, parent, or guardian.[29] A similar approach will be  
17  
18 taken for this research. All data will be anonymised and stored under lock and key, with  
19  
20 access granted to the research team only.  
21  
22

### 23 24 25 26 **Dissemination of results**

27  
28 The results will be presented at feedback sessions with the Hospital Board, Eastern  
29  
30 Cape Department of Health and at national and international congresses and may be used to  
31  
32 compile guidelines on assessment and management of catatonia in the region. They will also  
33  
34 be compiled as a thesis, which will be submitted for examination for a Ph.D. in Psychology at  
35  
36 Nelson Mandela University. A research report based on the study results will be submitted to  
37  
38 peer-reviewed journals to be considered for publication.  
39  
40  
41  
42  
43  
44  
45  
46

### 47 **REFERENCES**

- 48  
49 1 Fink M, Taylor MA. Catatonia: A Clinician's Guide to Diagnosis and Treatment.  
50  
51 Cambridge: Cambridge University Press 2003.  
52  
53 2 Stuivenga M, Morrens M. Prevalence of the catatonic syndrome in an acute inpatient  
54  
55 sample. *Front Psychiatry* 2014;5:174. doi:[10.3389/fpsy.2014.00174](https://doi.org/10.3389/fpsy.2014.00174)  
56  
57

- 1  
2  
3 3 Bush G, Fink M, Petrides G, et al. Catatonia. I. Rating scale and standardized  
4  
5 examination. *Acta Psychiatr Scand* 1996;93:129-36. doi:10.3389/fpsyt.2014.00174  
6  
7
- 8 4 Grover S, Ghosh A, Ghormode D. Do patients of delirium have catatonic features? An  
9  
10 exploratory study. *Psychiatry Clin Neurosci* 2014;68:644-51. doi:[10.1111/pcn.12168](https://doi.org/10.1111/pcn.12168)  
11  
12
- 13 5 Luchini F, Medda P, Mariani MG, Mauri M, Toni C, Perugi G. Electroconvulsive therapy  
14  
15 in catatonic patients: efficacy and predictors of response. *World J Psychiatry* 2015;5:182-  
16  
17 92. doi:[10.5498/wjp.v5.i2.182](https://doi.org/10.5498/wjp.v5.i2.182)  
18  
19
- 20 6 Fink M, Taylor MA. The many varieties of catatonia. *Eur Arch Psychiatry Clin Neurosci*  
21  
22 2001;251:I8-I13. doi:10.1007/PL00014200  
23  
24
- 25 7 Fricchione GL, Cassem NH, Hooberman D, Hobson D. Intravenous lorazepam in  
26  
27 neuroleptic-induced catatonia. *J Clin Psychopharmacol* 1983;3:338-42.  
28
- 29 8 Tandon R, Heckers S, Bustillo J, et al. Catatonia in DSM-5. *Schizophr Res* 2013;150:26-  
30  
31 30. doi:[10.1016/j.schres.2013.04.034](https://doi.org/10.1016/j.schres.2013.04.034)  
32  
33
- 34 9 White DA, Robins AH. An analysis of 17 catatonic patients diagnosed with neuroleptic  
35  
36 malignant syndrome. *CNS Spectr* 2000;5:58-65. doi:[10.1017/S1092852900013419](https://doi.org/10.1017/S1092852900013419)  
37  
38
- 39 10 Odayar K, Eloff I, Esterhuysen W. Clinical and demographic profile of catatonic patients  
40  
41 who received electroconvulsive therapy in a South African setting. *S Afr J Psychiatr*  
42  
43 2018;24:1-5. doi:[10.4102/sajpsychoiatry.v24i0.1100](https://doi.org/10.4102/sajpsychoiatry.v24i0.1100)  
44  
45
- 46 11 American Psychiatric Association. Diagnostic and Statistical Manual of Mental  
47  
48 Disorders: DSM- 5. Washington: American Psychiatric Association 2013.  
49
- 50 12 Sienaert P, Dhossche DM, Vancampfort D, et al. A clinical review of the treatment of  
51  
52 catatonia. *Front Psychiatry* 2014;5:181. doi:[10.3389/fpsyt.2014.00181](https://doi.org/10.3389/fpsyt.2014.00181)  
53  
54
- 55 13 Sienaert P, Rooseleer J, De Fruyt J. Measuring catatonia: a systematic review of rating  
56  
57 scales. *J Affect Disord* 2011;135:1-9. doi:[10.1016/j.jad.2011.02.012](https://doi.org/10.1016/j.jad.2011.02.012)  
58  
59

- 1  
2  
3 14 Wilson J, Niu, K, Nicholson SE, et al. The diagnostic criteria and structure of catatonia.  
4  
5 *Schizophr Res* 2015;164:256–62. doi:[10.1016/j.schres.2014.12.036](https://doi.org/10.1016/j.schres.2014.12.036)  
6  
7  
8 15 Fink M, Taylor MA. Electroconvulsive therapy: evidence and challenges. *JAMA*  
9  
10 2007;298:330-332. doi:10.1001/jama.298.3.330  
11  
12 16 Fink M. What was learned: studies by the consortium for research in ECT (CORE) 1997–  
13  
14 2011. *Acta Psychiatr Scand* 2014;129:417-26. doi:[10.1111/acps.12251](https://doi.org/10.1111/acps.12251)  
15  
16  
17 17 Petrides G, Fink M, Husain MM, et al. ECT remission rates in psychotic versus  
18  
19 nonpsychotic depressed patients: a report from CORE. *J ECT* 2001;17:244-53.  
20  
21  
22 18 Rosebush PI, Hildebrand AM, Furlong BG, et al. Catatonic syndrome in a general  
23  
24 psychiatric inpatient population: frequency, clinical presentation, and response to  
25  
26 lorazepam. *J Clinical Psychiatry* 1990;51:357-62.  
27  
28  
29 19 Rasmussen SA, Mazurek MF, Rosebush PI. Catatonia: our current understanding of its  
30  
31 diagnosis, treatment, and pathophysiology. *World J Psychiatry* 2016;6:391–8.  
32  
33 doi:[10.5498/wjp.v6.i4.391](https://doi.org/10.5498/wjp.v6.i4.391)  
34  
35  
36 20 Northoff G, Krill W, Wenke J, et al. The subjective experience in catatonia: systematic  
37  
38 study of 24 catatonic patients. *Psychiatr Prax* 1996;23:69-73.  
39  
40  
41 21 Moskowitz AK. “Scared Stiff”: catatonia as an evolutionary-based fear response. *Psychol*  
42  
43 *Rev* 2004;111:984-1002. doi:10.1037/0033-295X.111.4.984  
44  
45  
46 22 Scotland J. Exploring the philosophical underpinnings of research: relating ontology and  
47  
48 epistemology to the methodology and methods of the scientific, interpretive, and critical  
49  
50 research paradigms. *English Language Teaching* 2012;5:9-16  
51  
52  
53 23 Creswell JW. *Research Design: Qualitative and Mixed Methods Approaches*. London:  
54  
55 Sage 2009.  
56  
57 24 Campbell MM, Susser E, Mall S, et al. Using iterative learning to improve understanding

- 1  
2  
3 during the informed consent process in a South African psychiatric genomics study. *PloS*  
4  
5 *ONE* 2017;12:e0188466. doi:[10.1371/journal.pone.0188466](https://doi.org/10.1371/journal.pone.0188466)  
6  
7  
8 25 Campbell MM, de Vries J, Mqulwana SG, et al. Predictors of consent to cell line creation  
9  
10 and immortalisation in a South African schizophrenia genomics study. *BMC Med Ethics*  
11  
12 2018;19:72. doi:10.1186/s12910-018-0313-2  
13  
14  
15 26 Sarkar S, Sakey S, Mathan K, Bharadwaj B, Kattimani S, Rajkumar RP. Assessing  
16  
17 catatonia using four different instruments: Inter-rater reliability and prevalence in  
18  
19 inpatient clinical population. *Asian J Psychiatr.* 2016;23:27-31.  
20  
21  
22 doi:10.1016/j.ajp.2016.07.003  
23  
24 27 Statistics South Africa: Nelson Mandela Bay [Internet]. Republic of South Africa, c2011  
25  
26 [cited 20 February 2020]. Available from:  
27  
28 [http://www.statssa.gov.za/?page\\_id=993&id=nelson-mandela-bay-municipality](http://www.statssa.gov.za/?page_id=993&id=nelson-mandela-bay-municipality).  
29  
30  
31 28 Statistics South Africa: Statistics South Africa to release the Quarterly Labour Force  
32  
33 Survey (QLFS), 2<sup>nd</sup> Quarter 2019 [Internet]. Republic of South Africa [cited 24 August  
34  
35 2029]. Available from: <http://www.statssa.gov.za/?p=12358>  
36  
37  
38 29 Mental Health Care Act 2002 (Act no. 17 of 2002) General Regulations [Internet].  
39  
40 Government Gazette, Republic of South Africa, 15 December 2004, No. 27117, c2004  
41  
42 [cited 17 February 2020]. Available from:  
43  
44 [https://www.gov.za/sites/default/files/gcis\\_document/201409/a17-02.pdf](https://www.gov.za/sites/default/files/gcis_document/201409/a17-02.pdf).  
45  
46  
47 30 World Health Organization. Social determinants of mental health [Internet]. Geneva:  
48  
49 World Health Organization, c2014 [cited 23 March 2020]. Available from:  
50  
51 [https://www.who.int/mental\\_health/publications/gulbenkian\\_paper\\_social\\_determinants](https://www.who.int/mental_health/publications/gulbenkian_paper_social_determinants_of_mental_health/en/)  
52  
53 [of\\_mental\\_health/en/](https://www.who.int/mental_health/publications/gulbenkian_paper_social_determinants_of_mental_health/en/).  
54  
55  
56 31 Lund C, Breen A, Flisher AJ, et al. Poverty and common mental disorders in low-and  
57  
58  
59  
60

- 1  
2  
3 middle-income countries: a systematic review. *Soc Sci Med* 2010;71:517–528.  
4  
5 doi:[10.1016/j.socscimed.2010.04.027](https://doi.org/10.1016/j.socscimed.2010.04.027)  
6  
7  
8 32 American Academy of Pediatrics. Addressing food insecurity: a toolkit for pediatricians  
9  
10 [Internet]. c2017 [cited 21 April 2020]. Available from: [https://frac.org/wp-](https://frac.org/wp-content/uploads/frac-aap-toolkit.pdf)  
11  
12 content/uploads/frac-aap-toolkit.pdf Braun V, Clarke V. Using thematic analysis in  
13  
14 psychology. *Qual Res Psychol* 2006;3:77-101. doi:10.1191/1478088706qp063oa  
15  
16  
17 33 Mason S, Barrow H, Phillips A, et al. Brief report on the experience of using proxy  
18  
19 consent for incapacitated adults. *J Med Ethics* 2006;32:61-62.  
20  
21 doi:10.1136/jme.2005.012302  
22  
23  
24 34 World Medical Association. World Medical Association Declaration of Helsinki. Ethical  
25  
26 principles for medical research involving human subjects. *Bull World Health Organ*  
27  
28 2001;79:373-4.  
29  
30  
31 35 Department of Health, Republic of South Africa. Ethics in health research: principles,  
32  
33 processes and structures, 2nd edition [Internet]. Pretoria: National Department of Health,  
34  
35 c2015 [cited 23 March 2020\_\_]. Available from:  
36  
37 <https://www.ru.ac.za/media/rhodesuniversity/content/ethics/documents/nationalguidelines>  
38  
39 [/DOH\\_\(2015\)\\_Ethics\\_in\\_health\\_research\\_Principles\\_processes\\_and\\_structures.pdf](https://www.ru.ac.za/media/rhodesuniversity/content/ethics/documents/nationalguidelines/DOH_(2015)_Ethics_in_health_research_Principles_processes_and_structures.pdf).  
40  
41  
42  
43  
44

#### **AUTHOR CONTRIBUTIONS**

45  
46 Z Zingela conceived the idea and devised the project and its main conceptual ideas assisted  
47  
48 by S van Wyk and M Fink. L Stroud and J Cronje supervised the development of this  
49  
50 manuscript and provided editorial input.  
51  
52  
53

#### **FUNDING STATEMENT**

1  
2  
3 This work was supported by the South African Medical Research Council (SAMRC), grant  
4 tracking number 2017SAMRC0SIR0000157977 and an educational grant from the Health  
5 and Welfare Sector Education and Training Authority (2018/2019HWSETA219986789).  
6  
7  
8  
9  
10  
11

## 12 **COMPETING INTERESTS STATEMENT**

13  
14 The authors have no competing interests to declare.  
15  
16  
17  
18

19 Figure 1

20  
21 Assessment Tools  
22  
23  
24  
25

26 Figure 2

27  
28 The Study Process  
29  
30  
31  
32  
33  
34  
35  
36  
37  
38  
39  
40  
41  
42  
43  
44  
45  
46  
47  
48  
49  
50  
51  
52  
53  
54  
55  
56  
57  
58  
59  
60

Figure 1: Assessment Tools

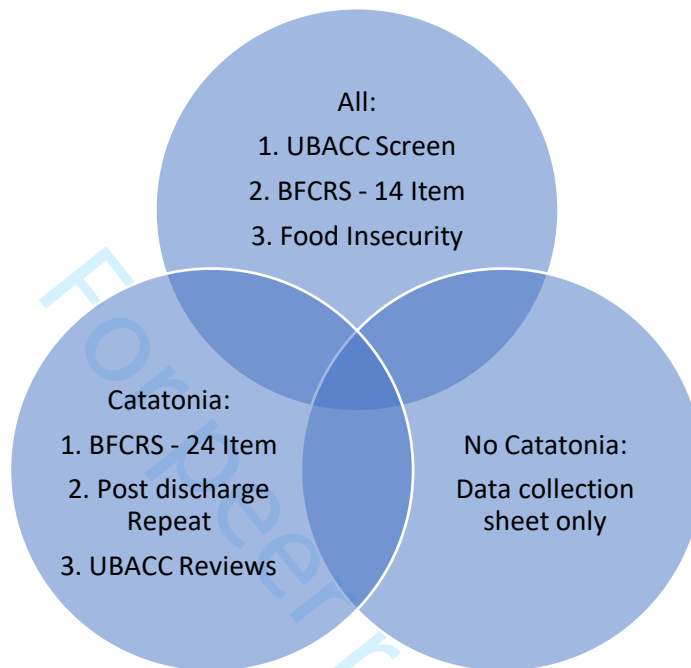



Figure 2: Study Process

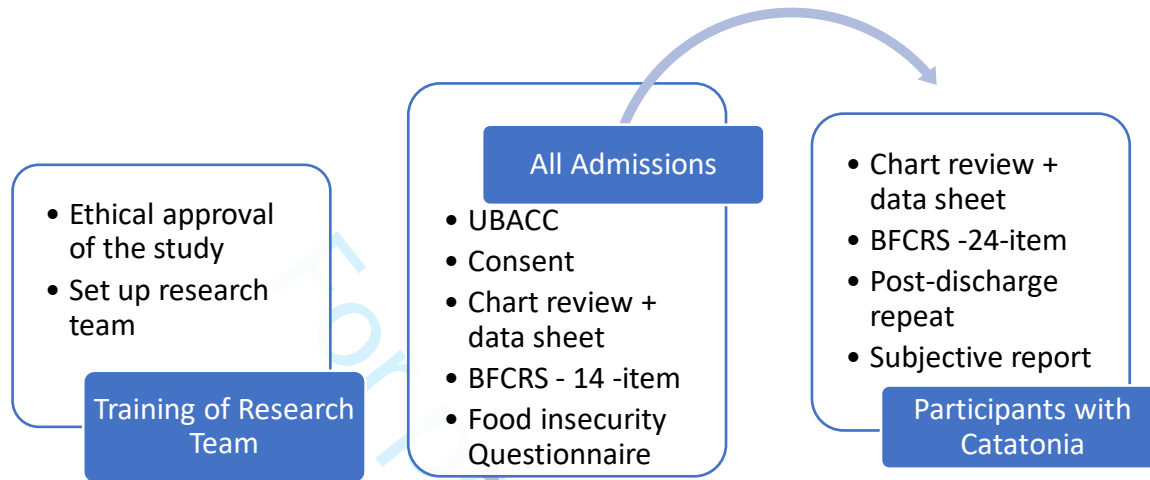

**APPENDICES**

**APPENDIX 1: DATA COLLECTION SHEET**

| Enrolment No: | Tick applicable box or insert answer in area shaded in white                                                                            |    |  |               |       |                       |   |                                                                                  |   |                           |                                      |                                       |                    |                            |     |
|---------------|-----------------------------------------------------------------------------------------------------------------------------------------|----|--|---------------|-------|-----------------------|---|----------------------------------------------------------------------------------|---|---------------------------|--------------------------------------|---------------------------------------|--------------------|----------------------------|-----|
| Unit          | Is the Patient Catatonic now?<br>(Fill in the BFCRS item 1 to 14 to answer this question), 2 or more signs mean Yes, there is catatonia |    |  |               |       |                       |   |                                                                                  |   |                           |                                      |                                       |                    |                            |     |
| DNH           | If No then tick this box and fill in ONLY Sections A,G,H,I, and J                                                                       |    |  |               |       |                       |   | If Yes then tick this box and fill in sections A, B, C, D, E, F, G, H, I, and J. |   |                           |                                      |                                       |                    |                            |     |
| A. Age        |                                                                                                                                         |    |  | Sex           |       | Ethnicity             |   |                                                                                  |   | 1st admission             | Catatonic symptoms before?           | Provisional DSM -5 Diagnosis in file? | Substance Use?     | Another medical conditions |     |
| < 16          | 6 - 36                                                                                                                                  | >  |  | F             | M (1) |                       |   |                                                                                  |   |                           | Yes                                  | Yes                                   | Yes                | Yes                        | Yes |
|               | 35 - 65                                                                                                                                 |    |  | (0)           |       | B                     | C | I                                                                                | W | No                        | No                                   | Diagnosis                             | No                 | No                         |     |
|               |                                                                                                                                         | 65 |  |               |       |                       |   |                                                                                  |   |                           |                                      | .....                                 |                    |                            |     |
|               |                                                                                                                                         |    |  |               |       |                       |   |                                                                                  |   |                           |                                      | ....                                  |                    |                            |     |
|               |                                                                                                                                         |    |  |               |       |                       |   |                                                                                  |   |                           | No                                   | No                                    |                    |                            |     |
|               |                                                                                                                                         |    |  |               |       |                       |   |                                                                                  |   | No of previous admissions | No of times had catatonia previously | No of previous diagnoses?             |                    | No of medical conditions?  |     |
|               |                                                                                                                                         |    |  |               |       |                       |   |                                                                                  |   | Not known                 | Not known                            | Not known                             | Not known          | Not known                  |     |
| <b>B.</b>     |                                                                                                                                         |    |  | <b>BZD or</b> |       | <b>Blood Pressure</b> |   |                                                                                  |   | <b>Pulse</b>              | <b>Body</b>                          | <b>Respiratory</b>                    | <b>Name of BZD</b> |                            |     |

|                         |                            |                            |                   |                            |             |                            |                            |
|-------------------------|----------------------------|----------------------------|-------------------|----------------------------|-------------|----------------------------|----------------------------|
| <b>BFCR Scale Score</b> | <b>LRZ</b>                 | <b>Systolic:</b>           | <b>Diastolic:</b> |                            | <b>Temp</b> | <b>Rate/ O2</b>            | <b>given:</b>              |
|                         | <b>Dose:</b>               | <120                       | <70               | <70                        | <35         | <b>Sats</b>                | Lorazepam                  |
|                         | 1-2mg                      | 120 -139                   | 80 -90            | 71-100                     | 35 -37      | <b>&lt;90%</b>             | Clonazepam                 |
|                         | 2-4 mg                     | 140 – 180                  | 91-110            | 101-120                    | 38 – 40     | <b>91 – 93</b>             | Diazepam                   |
|                         | >4 mg                      | 181 – 220                  | 110-120           | 121-160                    | >40         | <b>94 – 96</b>             | Midazolam                  |
|                         | <b>No of dose/s</b>        | >220                       |                   | >160                       |             | <b>97 – 99</b>             | Dose.....                  |
|                         | 1 -2                       |                            | >120              |                            |             | <b>100</b>                 | Other Treatment?           |
|                         | 3 - 4                      |                            |                   |                            |             |                            | .....                      |
|                         | 5 or more                  |                            |                   |                            |             |                            |                            |
| <b>Initial Score</b>    | <b>1<sup>st</sup> dose</b> | <b>2<sup>nd</sup> dose</b> |                   | <b>3<sup>rd</sup> dose</b> |             | <b>4<sup>th</sup> dose</b> | <b>5<sup>th</sup> dose</b> |
| <6                      | <6                         | <6                         |                   | <6                         |             | <6                         | <6                         |
| 6-12                    | 6-12                       | 6-12                       |                   | 6-12                       |             | 6-12                       | 6-12                       |
| 12-24                   | 12-24                      | 12-24                      |                   | 12-24                      |             | 12-24                      | 12-24                      |
| 24-36                   | 24-36                      | 24-36                      |                   | 24-36                      |             | 24-36                      | 24-36                      |
| >36                     | >36                        | >36                        |                   | >36                        |             | >36                        | >36                        |

|                                                                          |                                      |                                                                                                       |                                   |                                    |                                                               |                            |
|--------------------------------------------------------------------------|--------------------------------------|-------------------------------------------------------------------------------------------------------|-----------------------------------|------------------------------------|---------------------------------------------------------------|----------------------------|
| <b>C. Length of time and degree of response to BZD</b>                   | 1 <sup>st</sup> hour after admission | 2-3 days                                                                                              |                                   | 4-6 days                           | <b>Degree of Response</b>                                     |                            |
|                                                                          |                                      |                                                                                                       |                                   |                                    | Mild = Less than 25% reduction in No. of symptoms             |                            |
|                                                                          | 2 to 6 hours after admission         | 7-10 days                                                                                             | 11-14 days                        | >14 days                           | Moderate = 25% to 50% reduction in No. of symptoms            |                            |
|                                                                          | 7 to 47 hours after admission        | Reason ECT was not given after the 1 <sup>st</sup> 3 days of admission (from clinical notes)<br>..... |                                   |                                    | Good = Response of more than 50% reduction in No. of symptoms |                            |
|                                                                          |                                      |                                                                                                       |                                   |                                    | Response to BZD not sustained                                 |                            |
| <b>D. ECT and response</b>                                               | Yes                                  | <b>Number of Sessions</b>                                                                             | <b>Response</b>                   |                                    | Response to ECT not sustained                                 |                            |
|                                                                          |                                      |                                                                                                       |                                   |                                    |                                                               |                            |
|                                                                          |                                      | <4                                                                                                    | Nil                               |                                    | <b>Maintenance ECT prescribed or required?</b>                |                            |
|                                                                          |                                      | 5-9                                                                                                   | Remission of catatonia            |                                    |                                                               |                            |
|                                                                          | 10-12                                | Other (specify).....                                                                                  |                                   |                                    |                                                               |                            |
| No                                                                       | >12                                  | Time to 50% improvement                                                                               | Time to full Resolution           | Yes, prescribed?                   | No, not prescribed                                            |                            |
|                                                                          |                                      | <3 days                                                                                               | <3 days                           | If so what is the No. of sessions? |                                                               |                            |
|                                                                          |                                      | 4-7 days                                                                                              | 4-7 days                          |                                    |                                                               |                            |
|                                                                          |                                      | >1 week                                                                                               | >1 week                           |                                    |                                                               |                            |
| <b>E. Duration of Catatonia prior to admission if known OR Not Known</b> | Hours to 3 days                      | <b>Duration of Catatonia Prior to admission?</b>                                                      | Any other additional information? |                                    |                                                               |                            |
|                                                                          | 4 days to 2 weeks                    |                                                                                                       | NOT known OR                      |                                    |                                                               |                            |
|                                                                          | 3 to 4 weeks                         |                                                                                                       | < 3 days                          |                                    |                                                               |                            |
|                                                                          | More than 4 weeks                    |                                                                                                       | 4 to 7 days                       |                                    |                                                               |                            |
|                                                                          |                                      | >7 days                                                                                               |                                   |                                    |                                                               |                            |
| <b>F. Type of onset</b>                                                  | Hours to days                        | Gradual                                                                                               | Fluctuating                       | <b>Mostly Excited Form?</b>        |                                                               | <b>Mostly Slowed Form?</b> |
|                                                                          |                                      |                                                                                                       |                                   |                                    |                                                               |                            |

|                        |                                                                                                          |                |            |                                   |                                                  |          |                 |           |
|------------------------|----------------------------------------------------------------------------------------------------------|----------------|------------|-----------------------------------|--------------------------------------------------|----------|-----------------|-----------|
|                        |                                                                                                          |                |            | Excited/ Stereotypy/<br>Mannerism | Stupor/ Withdrawal/ Rigidity/ Mutism/<br>Staring |          |                 |           |
| <b>G.</b>              | 1. Within the past 12 months, we worried whether our food would run out before we got money to buy more. |                |            |                                   |                                                  |          |                 |           |
| <b>Food Insecurity</b> | Often True                                                                                               | Sometimes true | Never true | Don't know                        | Other                                            |          |                 |           |
|                        | 2. Within the past 12 months, the food we bought just didn't last and we didn't have money to get more.  |                |            |                                   |                                                  |          |                 |           |
|                        | Often true                                                                                               | Sometimes true | Never true | Don't know                        | Other                                            |          |                 |           |
| <b>H.</b>              |                                                                                                          | YES            | NO         | Alcohol                           | Cannabis                                         | Amphet   | Heroin          | Metamphet |
| <b>Substances</b>      |                                                                                                          |                |            | Cocaine                           | Opioids                                          | Nicotine | Other (Specify) |           |

| I. Medical Illness       | No              | Yes               | If Yes, chose from the following if on history only |                  | If Yes, choose from the following if current |                      | If HIV                   |                              |                      |     |
|--------------------------|-----------------|-------------------|-----------------------------------------------------|------------------|----------------------------------------------|----------------------|--------------------------|------------------------------|----------------------|-----|
|                          |                 |                   | HPT                                                 | DM               | HPT                                          | DM                   | On HAART?                | No                           |                      |     |
|                          |                 |                   | Epilepsy                                            | HIV              | Epilepsy                                     | HIV                  | If HIV on HAART, Regime? | If HIV, CD4?                 |                      |     |
|                          |                 |                   | Head Trauma                                         | TB               | Head Trauma                                  | TB                   | If HIV, Viral Load?      | Other (specify)              |                      |     |
|                          |                 |                   | SLE or Auto/I                                       | Other (specify)  |                                              | Other (specify)      |                          |                              |                      |     |
| J. Investigations:       | <b>CK (u/l)</b> |                   | <b>CK ≤ 200</b>                                     | <b>Fe μmol/l</b> | <b>Fe 9 to 30</b>                            | <b>VitB12 pmol/l</b> | <b>B12 ≤ 107</b>         |                              | <b>Auto/I Screen</b> |     |
|                          | CK              |                   | CK                                                  | Fe               | Fe                                           | B12                  | B12                      | RF                           | ESR                  | ANA |
|                          | 201 - 1000      |                   | ≥ 1000                                              | ≤ 9              | ≥ 30                                         | 108 - 221            | ≥ 221                    | < 14IU/ml<br>OR<br>> 14IU/ml | < 29                 | Pos |
|                          |                 |                   |                                                     |                  |                                              |                      |                          |                              | OR                   | OR  |
|                          |                 |                   |                                                     |                  |                                              |                      |                          |                              | > 29                 | Neg |
| <b>Endocrine</b>         |                 | <b>TSH miu/l</b>  | ≤ 0.38                                              | ≥ 5.33           | <b>Cortisol</b>                              | ≤ 184                |                          | ≥ 618                        |                      |     |
| <b>Rheumatoid Factor</b> |                 | <b>Normal TSH</b> | 0.38 to 5.33                                        |                  | <b>Normal (AM)</b>                           | 185 to 617           |                          |                              |                      |     |
|                          |                 | <b>T4 pmol/l</b>  | ≤ 7.2                                               | ≥ 16.4           | <b>Cortisol (PM)</b>                         | ≤ 276 (pm)           |                          | ≥ 276                        |                      |     |
|                          |                 | <b>Normal T4</b>  | 7.2 to 16.4                                         |                  | ≤ 276                                        |                      |                          |                              |                      |     |

**END OF INPATIENT DATA CAPTURING SECTIONS**

**BEGINNING OF OUTPATIENT FOLLOW UP SECTION FIR PATIENTS WHO HAD CATATONIA**

| K.<br>Follow-up<br>Period<br>ONLY                                                                                               | Date of<br>Discharge                                                                                                                                                      | 1 month                                                                                                                                                                                                  | 2 months                              | 3months | Other |
|---------------------------------------------------------------------------------------------------------------------------------|---------------------------------------------------------------------------------------------------------------------------------------------------------------------------|----------------------------------------------------------------------------------------------------------------------------------------------------------------------------------------------------------|---------------------------------------|---------|-------|
| Please tick the applicable box                                                                                                  | Recurrence of Catatonia?<br>Yes<br>No                                                                                                                                     | Recurrence of Catatonia?<br>Yes<br>No                                                                                                                                                                    | Recurrence of Catatonia?<br>Yes<br>No | Other?  |       |
| Please describe (in your own words) your experience/ of the catatonic episode in terms of your thoughts, feelings and behaviour | Uyacelwa<br>uchaze<br>(ngawakho amazwi)<br>ngamava akho<br>ngexesha<br>ubune<br>catatonia<br>ngokwengcing<br>a zakho,<br>indlela<br>obuziva ngayo<br>nezinto<br>obuzenza. | <b>PARTICIPANT RESPONSE RECORDED VERBATUM (USE AUDIO RECORDER)</b><br><br><b>Thoughts</b><br><br><br><br><br><br><br><br><br><br><b>Feelings</b><br><br><br><br><br><br><br><br><br><br><b>Behaviour</b> |                                       |         |       |

**APPENDIX 2: INFORMED CONSENT FORM INFORMED CONSENT – ENGLISH**

**INFORMED CONSENT FOR A STUDY ON CATATONIA**

Dear Participant or Relative

We are requesting your consent to enroll you in a study on catatonia and how the symptoms respond to the treatment you are going to be given.

---

**YES, I AGREE TO BE ENROLLED**

I .....  
 agree in **voluntarily** taking part in the study as explained to me by the doctor/ nurse

**OR**

(In cases where the patient is incapable of giving consent but is not opposed to taking part in the study, then a relative or custodian may provide informed consent by also signing below)

I ..... being the..... of  
 ..... **willingly** agree that he/she may take part in the study which has been explained to us by the doctor/ nurse

Signature of participant/relative/ custodian:

.....

Signed by ..... at.....on the  
 ..... of..... 2019

---



**NO, I DO NOT AGREE TO BE ENROLLED**

I .....

do not agree in taking part in the study as explained to me by the doctor/ nurse OR

I ..... being the..... of  
 ..... do not agree that he/she may take part in the study which has been  
 explained to us by the doctor/ nurse

**Signature** of **participant/relative/** **custodian:**

.....

**FOR OFFICE USE ONLY: ASSESSMENT OF CAPACITY TO CONSENT BASED ON UBACC**

| <i>Does the patient....</i>                                             |            |           |
|-------------------------------------------------------------------------|------------|-----------|
|                                                                         | <i>Yes</i> | <i>No</i> |
| 1. <i>Understand the information relevant to the decision?</i>          | .....      | .....     |
| 2. <i>Retain the information long enough to consider it?</i>            | .....      | .....     |
| 3. <i>Weigh the information as part of the decision-making process?</i> | .....      | .....     |
| 4. <i>Communicate their decision in some way?</i>                       | .....      | .....     |

*Please Note: Should there be a no answer to any of the 4 questions above then the patient lacks capacity to consent and a relative or custodian may then be requested to provide informed consent.\*

1  
2  
3  
4 **INFORMED CONSENT - ISIXHOSA**  
5  
6

7 **IPHEPHA-MVUME LOPHANDO NGESIGULO SE-CATATONIA**  
8  
9

10  
11 *Mthathi-nxaxheba obekekileyo okanye Mzali okanye sizalwane esibekileyo*  
12  
13

14 Sicela imvume yakho yokuphanda nzulu ngeempawu zesi sigulo i-catatonia, nokuba unyango  
15 ozakulufumana luzakusebenzela njani na.  
16

17 Ndiye ndanikwa iphepha elichaza ngolu phando kwaye ndiluchazelwe ngu  
18  
19 .....

20  
21  
22  
23  
24  
25 **EWE NDIYAVUMA**  
26

27  
28 Mna (faka igama lakho apha) .....  
29 ndiyazikhethela ukulungenela olu phando ndiluchazelwe ngugqirha okanye umongikazi, kwaye  
30 andinyanzeliswanga.  
31  
32

33 **OKANYE**  
34  
35

36  
37 Ukuba umntu akakwazi ukunika imvume ngasizathu sithile, kodwa abe engali ukulungenela  
38 uphando, kungatyikitya umzali okanye isizalwane  
39

40 Isayinwe ngu..... e..... ngomhla we.....  
41  
42 kwinyanga ye.....ku 2019  
43  
44

45 **HAYI NDIKHETHA UKUNGALUNGENELI OLU PHANDO**  
46

47 Mna (faka igama lakho apha) ..... ndikhetha ukuba ndingalungeni olu phando  
48 ndiluchazelwe ngugqirha okanye umongikazi  
49

50 Mna ndingu.....(Chaza uhlobene njani nomthathi-nxaxheba)  
51 ka.....(igama lomthathi nxaxheba)  
52  
53  
54  
55  
56  
57  
58  
59  
60

1  
2  
3  
4 Isaynwe e..... ngomhla we..... kwinyanga ye.....ku  
5 2019

6  
7 Utyikitya apha wena okanye umzali okanye isizalwane  
8  
9 .....

## 12 APPENDIX 3: INFORMATION LEAFLETS IN ENGLISH AND XHOSA

### 14 3.1 - INFORMATION LEAFLET (XHOSA)

#### 17 **Iphepha lokwazisa umthathi-nxaxheba kuphando lwesigulo i-Catatonia**

18 Mthathi-nxaxheba obekekileyo okanye Mzali okanye sizalwane esibekekileyo

19 Ngale ncwadi sikwazisa malunga ngophando nzulu oluqhutywa ziinzululwazi ezifuna ukufunda nzulu  
20 ngesigulo ekuthiwa yi-catatonia kweli ziko lempilo. Unyango obuhleli uzakulufumna alusayi kutshintsha  
21 okanye luphazamiseke wakuthatha inxaxheba kolu phando.

#### 27 **Yintoni i-catatonia?**

28 I-catatonia le sisigulo esiye sibangele ukuphazamiseka kwindlela umntu ashukuma ngayo apha emzimbeni.  
29 Kwabanye abantu sibangela ukuba umzimba lo ucothe kakhulu okanye ungakwazi kushuma, umntu azive  
30 eqinile, athi nokuba uyafuna ukushumisa umzimba wakhe njengesiqhelo angakwazi. Ide ibangele loo nto  
31 ngelinye ixesha ukuba umntu aphelele ehleli ndawoninye okanye emile ndawoninye de kugqithe imizuzu  
32 emininzi okanye iiyure zibe liqela. Iyakwazi nokubangela ukuba umntu angakwazi ukuphuma  
33 kwasebhedini, angakwazi kuzityisa, angakwazi kuzihlamba, asoloko elele ebhedini okanye ehleli  
34 esitulweni.

35 Kwelinye icala i-catatonia iyakwazi ukubangela ukuba umntu athi ngoku sele eqalile ukushukuma esithi  
36 wenza into ethile, suka umzimba lo uqine, aphelele amalungu omzimba afana neengalo, izandla, imilenze  
37 okanye iinyawo zilenga emoyeni angakwazi ukuyigqibezela laa nthsukumo ebeyiqalile. Intamo nentloko  
38 nazo ziyakwazi ukuphetha zikekele ngenxa yoku kuqina komzimba kuvela ngesiquphe.

39 Okokugqibela, i-catatonia iyakwazi ukuphinda ibangele intshukumo engaphaya kunesiqhelo, aphelele  
40 umntu eshuku-shukuma kakhulu, angahlali ndawonye okanye angazinzi. Abanye baye bazule ndawoninye,  
41 abanye baqhwabe izandla unomphelo okanye banqwale kungenjalo baninike intloko into engapheliyo.  
42 Iyakwazi nokubela ngokuba omnye umntu abetha-bethe amanqindi emoyeni, omnye athi nokuba  
43 usebhedini kube ngathi unyomfa ibhaysikili into engapheliyo. Babakhona nabaphetha bethetha into enye,  
44  
45  
46  
47  
48  
49  
50  
51  
52  
53  
54  
55  
56  
57  
58  
59  
60

okanye benze isikhalo esiphindaphindwayo okanye nayiphina intsholo abaye bayiqhube imizuzu emininzi okanye iiyure zide zibe liqela. Bakhona ke nabanye abaye balinganise loo nto ithethwa ngumntu ophambi kwabo kungenjalo balinganisa loo nto bayibona isenziwa ngumntu ophambi kwabo.

### **Ibangelwa yintoni i-catatonia?**

I-catatonia iyakwazi ukubangelwa zizigulo ezithile zengqondo kungenjalo nezinye izigulo zomzimba ziyakwazi ukuhamba ne-catatonia. Ingxaki esiye siyifumane thina boogqirha neenzululwazi kukungazi xa siqala ukumbona umntu onale catatonia ukuba ingaba eyakhe ibangelwa sisigulo sengqondo na okanye sesomzimba kusini na. Yiloo tno side sabona ukuba kungakuhle ukuba sinokuyiphonononga nzulu le ngxaki.

### **Luqulethe ntoni olu phando?**

Sijonge ekubeni wonke umntu oze kulaliswa kweli candelo, ahlolwe, kukhangelwe ukuba akahlaselwanga ziimpawu ezithile zale-catatonia kusini na. Wothi uhlolwe ngugqirha wakho ebehleli ezakuhlola kakade. Ukuba zikhona iimpawu ezithile ugqirha acinga ukuba uziqaphele apha kuwe, usenakho ukubuza ngazo umzekelo mhlawumbi ukuba ziqale nini, njani, kwaye ingaba uyaqala ukuba nazo na njalonzalo. Uzakube phofu ebhala loo nto umxelela yona. Apha ekubhaleni kwakhe kodwa akazokulibhala igama lakho nokuba ungubani kwaye uhlala phi. Oku kuhlolwa nokubuzwa nge-catatonia kungathatha imizuzu emihlanu ukuya kweli shumi kuphela. Ulwazi esiluloqokelelayo ngawe kukuba nje iimpawu zesi sigulo unazo na kwaye nale mibuzo sesiyikhakanyile kuphela.

Zimbini izinto esifuna ukuziqwalasela kolu phando nge-catatonia:

1. Ingaba bangaphi abantu abafunyanwa sesi sigulo kule ngingqi?

2. Ingaba zikhona izinto ezingunobangela wokuba abanye abantu bafunyanwe sesi sigulo abanye basinde, mhlawumbi njengobubudala bomntu, isini okanye ezinye izigulo zomzimba?

Nayiphi na into esinokuyifunda eyongezelela kulwazi esele sinalo ngesi-sigulo ingasinceda kakhulu ekubeni sikwazi ukusinyanga ngcono kwixa elizayo. Ngako oko ubukho bakho nokuthatha kwakho inxaxheba kolu phando kuya kunceda abantu abaninzi abanokuthi bafunyanwe sesi sigulo.

Alukho olunye uvavanyo oza kulwenza oludibene nolu phando. Naluphi na olunye uvavanyo okanye unyango ozakuthi ulufumane emva kokuba umongikazi okanye ugqirha egqibile ukukuhlola, lunyango lwesiqhelo obuhleli uzakulufumana kakade kugirha wakho.

1  
2  
3  
4  
5  
6 **Ukuba ndifunyaniswe ndinazo imipawu ze-catatonia loo nto ithetha ukuthini?**

7 Ukuba ufunyaniswe unazo ezinye zezi mpawu ze-catatonia, ugqira wakho wokunika unyango lakho  
8 lwesiqhelo okanye enze uvavanyo ebehleli ezakulwenzela kakade olunxulumene nempilo yakho.  
9  
10  
11

12  
13 **Kuza kwenziwa ntoni ngeziphumo zolu phando?**

14 Iziphumo zolu phando zizakudityaniswa zibhalwe kufndiswe abanye oogqirha neenzululwazi malunga nesi  
15 sigulo, kwiinkomfa zoogqirha neenzululwazi.  
16  
17  
18

19  
20 **Ndithini ukuba ndinemibuzo?**

21 Ukuba unemibuzo ngolu phando, cela ukuthetha nogqirha wakho okanye umongikazi ozakube encedisa  
22 kolu phando.  
23  
24  
25

26  
27 **Siyabulela!**

28 Sibulela kakhulu ngexesha lakho nokuzixhesha kwakho ngolu phando.  
29  
30

31  
32 **3.2 - INFORMATION LEAFLET (ENGLISH)**

33  
34  
35 **Information Leaflet about a Study of Catatonia**  
36  
37  
38  
39

40 Dear Participant / Parent/ Relative  
41  
42  
43

44 This leaflet is provided to inform you about a study being conducted by researchers who would like to  
45 investigate a condition called catatonia at his health facility. The usual care you were going to get will not  
46 be changed or disturbed through taking part in this study.  
47  
48  
49

50  
51 **What is catatonia?**

52 Catatonia is a condition that affects the way a person moves his whole body or body parts. In some people  
53 it slows down the body considerably to the point where some will stop moving completely, causing the  
54 person to feel very stiff such that they are unable to move even when they want to. This may lead to a  
55  
56  
57  
58  
59  
60

1  
2  
3  
4 person remaining in one position for a very long time (whether sitting or standing) to the point of many  
5 minutes or even hours. It can even cause some people to be bedridden, unable to feed themselves, or wash  
6 or attend to other daily needs.  
7  
8

9  
10  
11 Catatonia can also cause a person to appear frozen even after initiating a particular action, resulting in body  
12 parts like legs, arms hands or feet being frozen in awkward or unusual looking positions. The head and or  
13 neck may also be tilted at awkward angles. The change in movement can often occur suddenly.  
14  
15

16  
17  
18 Lastly catatonia can also cause an abnormality of excessive movement which is more than normal. A  
19 person may show excessive movement that lasts up to many minutes or hours with a seeming inability to  
20 stay still. Some people may pace up and down, others may clap or wave for long periods lasting minutes to  
21 hours, while others may show head nodding, head shaking, grimacing, etc. Some people have been seen to  
22 do shadow boxing or cycling movements even when lying down. It may also appear as repetitive speech of  
23 the same phrase, a cry or shout or other odd sound that can last for hours. Others may repeat what they hear  
24 around them non- stop or they may mimic actions of those around them as well.  
25  
26  
27  
28  
29

### 30 **What causes catatonia?**

31  
32  
33 Catatonia may be seen with a number of mental illnesses but it can also be associated with some other  
34 medical conditions. The problem we run into as doctors is when a person presents with the first time with  
35 this syndrome it may be difficult in the beginning to know what the underlying cause is i.e. whether the  
36 cause is a mental condition or another medical condition. This is why conducting research on catatonia is  
37 so important.  
38  
39  
40  
41  
42

### 43 **What does this research involve?**

44  
45 We are looking at ensuring that everybody who is admitted into this unit s examined and screened for  
46 symptoms and signs of catatonia. Your admitting doctor will examine you as usual, which will include an  
47 initial screen for catatonia through examination only. Following this, a trained research assistant who is a  
48 nurse will proceed to do a full screen using a rating scale, to ensure that no other signs of catatonia were  
49 missed. If there search assistant finds any additional signs of catatonia, they will tell your treating doctor. In  
50 addition, the nurse may ask you questions like when did the symptoms start and how fast did they appear  
51 etc. She or he will note down you answers but will not include details like your name or your address which  
52  
53  
54  
55  
56  
57  
58  
59  
60

1  
2  
3  
4 can identify who you are. This further screening by the nurse not expected to take longer than 5 to 10  
5 minutes. The information to be collected for the study about your condition is about the signs and  
6 symptoms and the few questions already mentioned to do with the illness, nothing more. There are two  
7 questions we would like to investigate about catatonia:  
8  
9

10  
11 1. How many people experience this condition in this area?  
12

13  
14 2. Are there particular characteristics that make some people more prone to it and others less  
15 vulnerable to it like age, gender or other medical conditions?  
16

17 Whatever we can learn about this condition, over and above what we know already will help us to come up  
18 with improved ways to diagnose it and to treat it in future. Taking part in this research will therefore help  
19 many people in future who may also get this illness.  
20  
21  
22

23  
24 There are no other tests you will be expected to take part in for this study. Whatever other tests or treatment  
25 interventions that follow will be those that your doctor would have undertaken anyway to help you manage  
26 your condition and get you better.  
27  
28  
29

30  
31 **If I am found to show some of the symptoms or signs of catatonia what does that mean?**  
32

33  
34  
35 If you are found to have some signs and symptoms of catatonia, the research nurse will inform your treating  
36 doctor, so that your doctor can give you the appropriate and usual treatment for your condition. Your doctor  
37 may also decide to do more tests which would be what they would have done anyway even if you were not  
38 part of the study, in order to manage your condition.  
39  
40  
41

42  
43 **What will be done with the results of the study?**  
44

45 The results of the study will be collected and put together to present to scientific congresses so that other  
46 doctors and scientists can learn from them.  
47  
48  
49

50  
51 **What should I do if I have more questions?**  
52

53 If you have more questions, ask your treating doctor or the researcher, research assistant or nurse.  
54  
55

56 **Thank you! Thank you very much for your patience and for spending the few minutes on this study.**  
57  
58  
59  
60

**APPENDIX 4: INSTITUTIONAL PERMISSIONS –DORA NGINZA HOSPITAL**

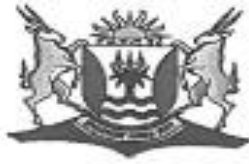

Province of  
**EASTERN CAPE**  
HEALTH

**DORA NGINZA REGIONAL HOSPITAL**

DEPARTMENT OF PSYCHIATRY & MENTAL HEALTH UNIT  
Spence Street - Zinda - Fort Elizabeth - 6205  
Private Bag X 11851 - Fort Elizabeth - 6005  
Telephone +27 41 405 4350 - Fax +27 41 405 4057

**DEPARTMENT OF PSYCHIATRY REQUEST FOR CEO APPROVAL OF DEPARTMENTAL RESEARCH**

|         |                                                                                |
|---------|--------------------------------------------------------------------------------|
| To      | Mr P Tsibolane<br>Chief Executive Officer<br>Dora Nginza Hospital              |
| From    | Dr A Bronkhorst, Prof S van Wyk and Prof Z Zingela<br>Department of Psychiatry |
| Subject | DEPARTMENT OF PSYCHIATRY REQUEST FOR CEO APPROVAL OF DEPARTMENTAL RESEARCH     |
| Date    | 08 November 2018                                                               |

**Introduction**

The Department of Psychiatry and Walter Sisulu University have identified research projects in catatonia as a priority for the Eastern Cape due to the severity of the illness and the potentially negative outcomes resulting from delay in recognition of the cognition

**Requested support**

CEO approval and support for the research project on Catatonia: "Catatonia as a manifestation of serious mental illness: prevalence, presentation, management and outcomes in a mental health unit", is hereby requested on behalf of the investigators to initiate this study in the Department of Psychiatry in Dora Nginza Hospital.

**Conclusion**

This project is also expected to yield support for other ongoing and planned registrar research projects on Catatonia. Thank you for considering this request.

A Bronkhorst

S van Wyk

Z Zingela

The request for approval is hereby **granted** / not granted (please delete as appropriate)

Signature: Designation: CEO Date: 08.11.18

Name: M. P. TSIBOLANE

Dora Nginza Regional Hospital  
Chief Executive Officer  
Mr M.P. Tsibolane

Signature: .....  
Date: .....



## APPENDIX 5: INSTITUTIONAL PERMISSIONS

### APPROVAL FROM EC HEALTH RESEARCH COMMITTEE

#### APPENDIX VI

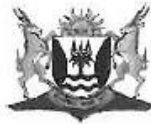

#### Eastern Cape Department of Health

Enquiries: Madoda Xokwe  
 Date: 19 December 2017  
 e-mail address: madoda.xokwe@echealth.gov.za

Tel No: 040 808 0710  
 Fax No: 043 642 1409

Dear Prof. Z. Zingela

**Re: Catatonia As A Presentation For Severe Mental Illness: Prevalence Of Catatonia In Two Mental Health Units In Urban And Rural South Africa (EC\_201712\_015)**

The Department of Health would like to inform you that your application for conducting a research on the abovementioned topic has been approved based on the following conditions:

1. During your study, you will follow the submitted protocol with ethical approval and can only deviate from it after having a written approval from the Department of Health in writing.
2. You are advised to ensure, observe and respect the rights and culture of your research participants and maintain confidentiality of their identities and shall remove or not collect any information which can be used to link the participants.
3. The Department of Health expects you to provide a progress on your study every 3 months (from date you received this letter) in writing.
4. At the end of your study, you will be expected to send a full written report with your findings and implementable recommendations to the Epidemiological Research & Surveillance Management. You may be invited to the department to come and present your research findings with your implementable recommendations.
5. Your results on the Eastern Cape will not be presented anywhere unless you have shared them with the Department of Health as indicated above.

Your compliance in this regard will be highly appreciated.

SECRETARIAT: EASTERN CAPE HEALTH RESEARCH COMMITTEE

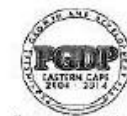

*Ikawa siqamketyo!*

APPENDIX 6:

CATATONIA RATING SCALE

APPENDIX VII

**BUSH-FRANCIS CATATONIA RATING SCALE**

Use presence or absence of items 1-14 for screening  
Use the 0-3 scale for items 1-23 to rate severity

|                                                                                                                                                                                                                                                                                                                                                                  |                                                                                                                                                                                                                                                                                                                                                                      |
|------------------------------------------------------------------------------------------------------------------------------------------------------------------------------------------------------------------------------------------------------------------------------------------------------------------------------------------------------------------|----------------------------------------------------------------------------------------------------------------------------------------------------------------------------------------------------------------------------------------------------------------------------------------------------------------------------------------------------------------------|
| <p><b>1. Excitement:</b></p> <p>Extreme hyperactivity, constant motor unrest which is apparently non-purposeful. Not to be attributed to akathisia or goal directed agitation</p> <p>0 = Absent<br/>1 = Excessive motion<br/>2 = Constant motion, hyperkinetic without rest periods<br/>3 = Full-blown catatonic excitement, endless frenzied motor activity</p> | <p><b>2. Immobility/stupor:</b></p> <p>Extreme hypoactivity, immobile, minimally responsive to stimuli</p> <p>0 = Absent<br/>1 = Sits abnormally still, may interact briefly<br/>2 = Virtually no interaction with external world<br/>3 = Stuporous, non-reactive to painful stimuli</p>                                                                             |
| <p><b>3. Mutism:</b></p> <p>Verbally unresponsive or minimally responsive</p> <p>0 = Absent<br/>1 = Verbally unresponsive to majority of questions; incomprehensible whisper<br/>2 = Speaks less than 20 words/ 5 min<br/>3 = No speech</p>                                                                                                                      | <p><b>4. Staring:</b></p> <p>Fixed gaze, little or no visual scanning of environment, decreased blinking.</p> <p>0 = Absent<br/>1 = Poor eye contact, repeatedly gazes less than 20 seconds between shifting of attention; decreased blinking<br/>2 = Gaze held longer than 20 seconds, occasionally shifts attention<br/>3 = Fixed gaze, non-reactive</p>           |
| <p><b>5. Posturing/catalepsy:</b></p> <p>Spontaneous maintenance of posture(s), including mundane (e.g. setting or standing for long periods without reacting).</p> <p>0 = Absent<br/>1 = Less than 1 minute<br/>2 = Greater than one minute, less than 15 minutes<br/>3 = Bizarre posture, or mundane maintained more than 15 minutes</p>                       | <p><b>6. Grimacing:</b></p> <p>Maintenance of odd facial expressions.</p> <p>0 = Absent<br/>1 = Less than 10 seconds<br/>2 = Less than 1 minute<br/>3 = Bizarre expression(s) or maintained more than 1 minute</p>                                                                                                                                                   |
| <p><b>7. Echopraxia/echolalia:</b></p> <p>Mimicking of examiner's movements/speech.</p> <p>0 = Mimicking of examiner's movements/speech<br/>1 = Occasional<br/>2 = Frequent<br/>3 = Constant</p>                                                                                                                                                                 | <p><b>8. Stereotypy:</b></p> <p>Repetitive, non-goal-directed motor activity (e.g. finger-play, repeatedly touching, patting or rubbing self); abnormality not inherent in act but in frequency.</p> <p>0 = Absent<br/>1 = Occasional<br/>2 = Frequent<br/>3 = Constant</p>                                                                                          |
| <p><b>9. Mannerisms:</b></p> <p>Odd, purposeful movements (hopping or walking tiptoe, saluting passers-by or exaggerated caricatures of mundane movements); abnormality inherent in act itself.</p> <p>0 = Absent<br/>1 = Occasional<br/>2 = Frequent<br/>3 = Constant</p>                                                                                       | <p><b>10. Verbigeration:</b></p> <p>Repetition of phrases or sentences (like a scratched record).</p> <p>0 = Absent<br/>1 = Occasional<br/>2 = Frequent<br/>3 = Constant</p>                                                                                                                                                                                         |
| <p><b>11. Rigidity:</b></p> <p>Maintenance of a rigid position despite efforts to be moved, exclude if cog-wheeling or tremor present.</p> <p>0 = Absent<br/>1 = Mild resistance<br/>2 = Moderate<br/>3 = Severe, cannot be repositioned</p>                                                                                                                     | <p><b>12. Negativism:</b></p> <p>Apparently motiveless resistance to instructions or attempts to move/examine patient. Contrary behavior, does exact opposite of instruction</p> <p>0 = Absent<br/>1 = Mild resistance and/or occasionally contrary<br/>2 = Moderate resistance and/or frequently contrary<br/>3 = Severe resistance and/or continually contrary</p> |
| <p><b>13. Waxy Flexibility:</b></p> <p>During repositioning of patient, patient offers initial resistance before allowing himself to be repositioned, similar to that of a bending candle.</p> <p>0 = Absent<br/>3 = Present</p>                                                                                                                                 | <p><b>14. Withdrawal:</b></p> <p>Refusal to eat, drink and/or make eye contact.</p> <p>0 = Absent<br/>1 = Minimal PO intake/interaction for less than 1 day<br/>2 = Minimal PO intake/interaction for more than 1 day<br/>3 = No PO intake/interaction for 1 day or more.</p>                                                                                        |

## BUSH-FRANCIS CATATONIA RATING SCALE (CONT.)

|                                                                                                                                                                                                                                                                                                                                |                                                                                                                                                                                                                                                                                                    |
|--------------------------------------------------------------------------------------------------------------------------------------------------------------------------------------------------------------------------------------------------------------------------------------------------------------------------------|----------------------------------------------------------------------------------------------------------------------------------------------------------------------------------------------------------------------------------------------------------------------------------------------------|
| <p><b>15. Impulsivity:</b></p> <p>Patient suddenly engages in inappropriate behavior (e.g. runs down hallway, starts screaming or takes off clothes) without provocation. Afterwards can give no, or only a facile explanation.</p> <p>0 = Absent<br/>1 = Occasional<br/>2 = Frequent<br/>3 = Constant or not redirectable</p> | <p><b>16. Automatic obedience:</b></p> <p>Exaggerated cooperation with examiner's request or spontaneous continuation of movement requested.</p> <p>0 = Absent<br/>1 = Occasional<br/>2 = Frequent<br/>3 = Constant</p>                                                                            |
| <p><b>17. Mitgehen:</b></p> <p>"Anglepoise lamp" arm raising in response to light pressure of finger, despite instruction to the contrary.</p> <p>0 = Absent<br/>3 = Present</p>                                                                                                                                               | <p><b>18. Gegenhalten:</b></p> <p>Resistance to passive movement which is proportional to strength of the stimulus, appears automatic rather than willful.</p> <p>0 = Absent<br/>3 = Present</p>                                                                                                   |
| <p><b>19. Ambitendency:</b></p> <p>Patient appears motorically "stuck" in indecisive, hesitant movement.</p> <p>0 = Absent<br/>3 = Present</p>                                                                                                                                                                                 | <p><b>20. Grasp reflex:</b></p> <p>Per neurological exam</p> <p>0 = Absent<br/>3 = Present</p>                                                                                                                                                                                                     |
| <p><b>21. Perseveration:</b></p> <p>Repeatedly returns to same topic or persists with movement.</p> <p>0 = Absent<br/>3 = Present</p>                                                                                                                                                                                          | <p><b>22. Combative:</b></p> <p>Usually in an undirected manner, with no, or only a facile explanation afterwards.</p> <p>0 = Absent<br/>1 = Occasionally strikes out, low potential for injury<br/>2 = Frequently strikes out, moderate potential for injury<br/>3 = Serious danger to others</p> |
| <p><b>23. Autonomic abnormality:</b></p> <p>Circle: temperature, BP, pulse, respiratory rate, diaphoresis.</p> <p>0 = Absent<br/>1 = Abnormality of one parameter [excluding pre-existing hypertension]<br/>2 = Abnormality of two parameters<br/>3 = Abnormality of three or more parameters</p>                              | <p><b>TOTAL:</b> _____</p>                                                                                                                                                                                                                                                                         |

Review only

## APPENDIX 7:

## ETHICS APPROVAL

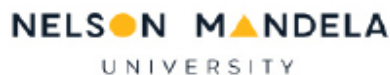

PO Box 77000, Nelson Mandela University, Port Elizabeth, 6031, South Africa [mandela.ac.za](mailto:mandela.ac.za)

Chairperson: Research Ethics Committee (Human)  
Tel: +27 (0)41 504 2347  
[shariene.govender@mandela.ac.za](mailto:shariene.govender@mandela.ac.za)

NHREC registration nr: REC-042508-025

Ref: [H20-HEA-PSY-002] / Approval]

18 August 2020

Prof L Stroud  
Faculty: Health Sciences

Dear Prof Stroud

**CATATONIA AS A MANIFESTATION OF SERIOUS MENTAL ILLNESS: PREVALENCE, PRESENTATION, MANAGEMENT AND OUTCOMES OF CATATONIA IN A MENTAL HEALTH UNIT**

PRP: Prof L Stroud  
PI: Dr Z Zingela

Your above-entitled application served at the Research Ethics Committee (Human) (meeting of 29 July 2020 2020) for approval. The study is classified as a high risk study. The ethics clearance reference number is H20-HEA-PSY-002 and approval is subject to the following conditions:

1. The immediate completion and return of the attached acknowledgement to [Imtiaz.Khan@mandela.ac.za](mailto:Imtiaz.Khan@mandela.ac.za), the date of receipt of such returned acknowledgement determining the final date of approval for the study where after data collection may commence.
2. Approval for data collection is for 1 calendar year from date of receipt of above mentioned acknowledgement.
3. The submission of an annual progress report by the PRP on the data collection activities of the study (form RECH-004 available on Research Ethics Committee (Human) portal) by 15 November this year for studies approved/extended in the period October of the previous year up to and including September of this year, or 15 November next year for studies approved/extended after September this year.
4. In the event of a requirement to extend the period of data collection (i.e. for a period in excess of 1 calendar year from date of approval), completion of an extension request is required (form RECH-005 available on Research Ethics Committee (Human) portal)
5. In the event of any changes made to the study (excluding extension of the study), completion of an amendments form is required (form RECH-006 available on Research Ethics Committee (Human) portal).
6. Immediate submission (and possible discontinuation of the study in the case of serious events) of the relevant report to RECH (form RECH-007 available on Research Ethics Committee (Human) portal) in the event of any unanticipated problems, serious incidents or adverse events observed during the course of the study.
7. Immediate submission of a Study Termination Report to RECH (form RECH-008 available on Research Ethics Committee (Human) portal) upon expected or unexpected closure/termination of study.
8. Immediate submission of a Study Exception Report of RECH (form RECH-009 available on Research Ethics Committee (Human) portal) in the event of any study deviations, violations and/or exceptions.
9. Acknowledgement that the study could be subjected to passive and/or active monitoring without prior notice at the discretion of Research Ethics Committee (Human).

1  
2  
3  
4  
5  
6  
7  
8  
9  
10  
11  
12  
13  
14  
15  
16  
17  
18  
19  
20  
21  
22  
23  
24  
25  
26  
27  
28  
29  
30  
31  
32  
33  
34  
35  
36  
37  
38  
39  
40  
41  
42  
43  
44  
45  
46  
47  
48  
49  
50  
51  
52  
53  
54  
55  
56  
57  
58  
59  
60

2

Please quote the ethics clearance reference number in all correspondence and enquiries related to the study. For speedy processing of email queries (to be directed to [Imtiaz.Khan@mandela.ac.za](mailto:Imtiaz.Khan@mandela.ac.za)), it is recommended that the ethics clearance reference number together with an indication of the query appear in the subject line of the email.

We wish you well with the study.

Yours sincerely

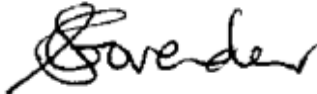

**Dr S Govender**  
**Chairperson: Research Ethics Committee (Human)**

Cc: Department of Research Development  
Faculty Manager: Health Sciences

[Appendix 1: Acknowledgement of conditions for ethical approval](#)

Peer review only

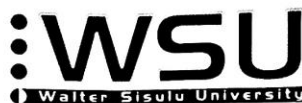

FACULTY OF HEALTH SCIENCES  
POSTGRADUATE EDUCATION, TRAINING, RESEARCH AND ETHICS UNIT

**HUMAN RESEARCH COMMITTEE  
CLEARANCE CERTIFICATE**

PROTOCOL NUMBER : 067/2017

PROJECT : PREVALENCE OF CATATONIA IN TWO MENTAL HEALTH UNITS IN URBAN AND RURAL SOUTH AFRICA

INVESTIGATOR(S) : PROF Z ZINGELA

DEPARTMENT : PSYCHIATRY & BEHAVIOURAL SCIENCES

DECISION OF THE COMMITTEE : APPROVED

DATE OF APPROVAL : 07 MAY 2020

DURATION : 1 YEAR (07 MAY 2020 – 07 MAY 2021)

CONDITIONS : NONE

**N.B** You are required to provide the committee with a progress or outcome report of the research after every 6 months. The committee expects a report on any changes in the protocol as well as any untoward events that may occur at any time during the study not later than 7 days of knowing as the investigator/s.

**WALTER SISULU UNIVERSITY**  
ACADEMIC HEALTH SERVICE COMPLEX OF THE  
EASTERN CAPE  
POSTGRADUATE EDUCATION AND TRAINING  
FACULTY OF HEALTH SCIENCES  
WALTER SISULU UNIVERSITY  
P/BAG X 1, WSU, 5117, E.C  
TEL: (047) 502 2100 / FAX: (047) 502 2101

  
DR EJ NDEBIA  
CHAIRPERSON

07.05.2020  
DATE

**DECLARATION OF INVESTIGATOR(S)**

(To be completed in duplicate and one copy returned to the Research Officer at Office AB 02 GF 03 Administration Building, Sisson Street Campus, Fort Gale, Mthatha, WSU)

I/We fully understand the conditions under which I am/we are authorized to carry out the abovementioned research and I/we guarantee to ensure compliance with these conditions. Should any departure to be contemplated from the research procedure as approved I/we undertake to resubmit the protocol to the Research Ethics Committee. I/We agree to a completion of a 6-monthly/ yearly progress report. The committee reserves the right to withdraw approval in the event that there are serious ethical violations.

..... (Signature)  
N. B. Please quote the protocol number in all enquiries.

..... (Date)

1  
2  
3  
4  
5  
6  
7  
8  
9  
10  
11  
12  
13  
14  
15  
16  
17  
18  
19  
20  
21  
22  
23  
24  
25  
26  
27  
28  
29  
30  
31  
32  
33  
34  
35  
36  
37  
38  
39  
40  
41  
42  
43  
44  
45  
46  
47  
48  
49  
50  
51  
52  
53  
54  
55  
56  
57  
58  
59  
60

For peer review only

# BMJ Open

## A Protocol for a Prospective Descriptive Prevalence Study of Catatonia in an Acute Mental Health Unit in Urban South Africa

|                                 |                                                                                                                                                                                                                                                                                                                                                                                              |
|---------------------------------|----------------------------------------------------------------------------------------------------------------------------------------------------------------------------------------------------------------------------------------------------------------------------------------------------------------------------------------------------------------------------------------------|
| Journal:                        | <i>BMJ Open</i>                                                                                                                                                                                                                                                                                                                                                                              |
| Manuscript ID                   | bmjopen-2020-040176.R2                                                                                                                                                                                                                                                                                                                                                                       |
| Article Type:                   | Protocol                                                                                                                                                                                                                                                                                                                                                                                     |
| Date Submitted by the Author:   | 25-Sep-2020                                                                                                                                                                                                                                                                                                                                                                                  |
| Complete List of Authors:       | Zingela, Zukiswa; Walter Sisulu University, Psychiatry and Human Behavioural Sciences; Walter Sisulu University, Dr. Stroud, Louise; Nelson Mandela University, Psychology<br>Cronje, Johan; Nelson Mandela Metropolitan University, Psychology<br>Fink, Max; Stony Brook University, Psychiatry<br>Van Wyk, Stephanus ; Walter Sisulu University, Psychiatry and Human Behavioural Sciences |
| <b>Primary Subject Heading</b>: | Mental health                                                                                                                                                                                                                                                                                                                                                                                |
| Secondary Subject Heading:      | Mental health, Neurology                                                                                                                                                                                                                                                                                                                                                                     |
| Keywords:                       | Neurology < INTERNAL MEDICINE, Adult psychiatry < PSYCHIATRY, MENTAL HEALTH, Child & adolescent psychiatry < PSYCHIATRY                                                                                                                                                                                                                                                                      |
|                                 |                                                                                                                                                                                                                                                                                                                                                                                              |

SCHOLARONE™  
Manuscripts





I, the Submitting Author has the right to grant and does grant on behalf of all authors of the Work (as defined in the below author licence), an exclusive licence and/or a non-exclusive licence for contributions from authors who are: i) UK Crown employees; ii) where BMJ has agreed a CC-BY licence shall apply, and/or iii) in accordance with the terms applicable for US Federal Government officers or employees acting as part of their official duties; on a worldwide, perpetual, irrevocable, royalty-free basis to BMJ Publishing Group Ltd ("BMJ") its licensees and where the relevant Journal is co-owned by BMJ to the co-owners of the Journal, to publish the Work in this journal and any other BMJ products and to exploit all rights, as set out in our [licence](#).

The Submitting Author accepts and understands that any supply made under these terms is made by BMJ to the Submitting Author unless you are acting as an employee on behalf of your employer or a postgraduate student of an affiliated institution which is paying any applicable article publishing charge ("APC") for Open Access articles. Where the Submitting Author wishes to make the Work available on an Open Access basis (and intends to pay the relevant APC), the terms of reuse of such Open Access shall be governed by a Creative Commons licence – details of these licences and which [Creative Commons](#) licence will apply to this Work are set out in our licence referred to above.

Other than as permitted in any relevant BMJ Author's Self Archiving Policies, I confirm this Work has not been accepted for publication elsewhere, is not being considered for publication elsewhere and does not duplicate material already published. I confirm all authors consent to publication of this Work and authorise the granting of this licence.

1  
2  
3  
4  
5  
6  
7  
8  
9  
10  
11  
12  
13  
14  
15  
16  
17  
18  
19  
20  
21  
22  
23  
24  
25  
26  
27  
28  
29  
30  
31  
32  
33  
34  
35  
36  
37  
38  
39  
40  
41  
42  
43  
44  
45  
46  
47  
48  
49  
50  
51  
52  
53  
54  
55  
56  
57  
58  
59  
60

## **A Protocol for a Prospective Descriptive Prevalence Study of Catatonia in an Acute Mental Health Unit in Urban South Africa**

Zukiswa Zingela,<sup>1</sup> Louise Stroud,<sup>2</sup> Johan Cronje,<sup>2</sup> Max Fink,<sup>3</sup> Stephan van Wyk<sup>1</sup>

### **Author Affiliations**

<sup>1</sup>Department of Psychiatry and Human Behavioural Science, Walter Sisulu University, Mthatha, South Africa

<sup>2</sup>Department of Psychology, Nelson Mandela University, Port Elizabeth, South Africa

<sup>3</sup>Department of Psychiatry, Stony Brook University, New York, United States of America

Word Count: 4451

### **Corresponding author**

Zukiswa Zingela: email: [zzingela@wsu.ac.za](mailto:zzingela@wsu.ac.za), Postnet Suite 274, Private Bag X13130, Humewood, 6013, South Africa

Tel +2747-502-1977

ORCID: 0000000234251145

### **ABSTRACT**

### **Introduction**

1  
2  
3 Catatonia arises from serious mental, medical, neurological, or toxic conditions. The  
4 prevalence range depends on the setting and the range is anything from 7% to 63% percent in  
5 other countries. South African prevalence rates are currently unknown. The proposed study is  
6 a quantitative descriptive study utilising the Bush Francis Catatonia Screening Instrument as a  
7 screening tool with a data capturing information sheet to extract clinical information from  
8 patient folders. The study will investigate: 1) prevalence of catatonia, 2) clinical and  
9 demographic correlates associated with catatonia, 3) predictors of catatonia, 4) response to  
10 treatment, and 5) subjective experience of catatonia.  
11  
12  
13  
14  
15  
16  
17  
18  
19  
20  
21

### 22 **Methods and analysis**

23  
24 The setting is an acute mental health unit (MHU) within a regional, general medical hospital  
25 in Nelson Mandela Bay, South Africa which accepts referrals from within the hospital and from  
26 outlying clinics. Participants will be recruited from inpatients in the MHU from beginning of  
27 September 2020 to end of August 2021. Most admissions are involuntarily, under the Mental  
28 Health Care Act of 2002 with an age range of 13 to over 65 years. Participants who screen  
29 positive for catatonia will be followed up after discharge for three months to measure outcomes.  
30 Primary outcomes will include the 12-month prevalence rate of catatonia, descriptive and other  
31 data on presentation and assessment of catatonia in the MHU.  
32  
33  
34  
35  
36  
37  
38  
39  
40  
41

42 Secondary outcomes will include data on treatment response, participants' report of their  
43 subjective experience of catatonia and predictors of catatonia.  
44  
45  
46

47 Descriptive statistics, multivariate binomial logistic regression, and univariate analyses will be  
48 conducted to evaluate associations between catatonia and clinical or demographic data which  
49 could be predictors of catatonia. Survival analysis will be used to examine the time to recovery  
50 after diagnosis and initiation of treatment. The 95% confidence interval will be used to  
51 demonstrate the precision of estimates. The level of significance will be  $p \leq .05$ .  
52  
53  
54  
55  
56  
57  
58  
59  
60

## Ethics and dissemination

The study has received ethical approval from the Research and Ethics Committees of the Eastern Cape Department of Health, Walter Sisulu University and Nelson Mandela University. The results will be disseminated as follows: at various presentations and feedback sessions; as part of a Ph.D. thesis in Psychology at Nelson Mandela University; and in a manuscript that will be submitted to a peer-reviewed journal.

Keywords: *Catatonia, assessment, screening tool, Bush Francis Catatonia Rating Scale, predictors*

## Article Summary

### Strengths and limitations of this study

- This is the first study to examine the prevalence of catatonia in South Africa and aims to address the lack of data on prevalence rates of catatonia, presentation, optimal management, predictors, and outcomes in this setting.
- The triangulation of information sources like the Bush Francis Catatonia Rating Scale, a validated catatonia screening tool, clinical notes, and subjective reports of catatonic episodes from the participants present a unique opportunity to investigate different aspects of catatonia.
- The descriptive nature of the study and the limited number of participants could limit the applicability of significant associations between variables regarding cause and effect and the generalisability of findings. The heterogenous nature of catatonia and interrater reliability of catatonia screening instruments are another source of potential limitations of the study.

## INTRODUCTION

In the 1880s, Kraepelin described the prevalence of catatonia as close to 20% in 500 cases.[1] Modern-day studies show a range from less than 10% to 63%.[1, 2, 3] Catatonia is often treated by psychiatrists, even though underlying causes may be other medical conditions such as neurological, infectious, endocrine, and substance-induced disorders.[1] Grover et al.[4] described close to 40% of 205 patients who had delirium and two or more catatonic symptoms on the Bush Francis Catatonia Rating Scale (BFCRS).

1  
2  
3 Luchini et al.[5] characterised catatonia as an autonomous syndrome, frequently  
4 associated with mood disorders but also observed in patients with other conditions including  
5 neurological, neurodevelopmental, physical, and toxic conditions. Current evidence has  
6 provided some answers about the categorisation of catatonia, clinical presentations,  
7 interventions, and response to treatment.[5, 6, 7, 8]  
8  
9  
10  
11  
12  
13  
14  
15  
16

17 The current study will investigate the prevalence of catatonia in patients of the Dora  
18 Nginza Hospital (DNH) mental health unit (MHU), associated risk factors and response to  
19 treatment. Due to the prominent role played by electroconvulsive therapy (ECT) in the  
20 treatment of catatonia, the results from this study may have applicability in public mental  
21 health planning, and availability of ECT in public hospitals.[1]  
22  
23  
24  
25  
26  
27  
28  
29  
30

### 31 **Catatonia in South Africa**

32  
33 There are currently no studies describing the prevalence of catatonia in South Africa  
34 (SA), which leaves clinicians blind to the burden of the disease linked to this potentially fatal  
35 syndrome. Clinicians may, therefore, be unaware of the importance of the assessment and  
36 detection of catatonia, leading to missed opportunities to intervene in what is a highly  
37 treatable condition.  
38  
39  
40  
41  
42  
43  
44  
45  
46

47 White and Robins[9] described 17 patients with catatonia in SA who received  
48 antipsychotic medication. There was a deterioration in their clinical presentation into  
49 neuroleptic malignant syndrome (NMS). The risk of precipitating NMS in this case series  
50 was linked to the administration of antipsychotics. This study also challenged the notion of  
51 NMS being viewed as a separate condition to catatonia. Since then, catatonia has not been  
52  
53  
54  
55  
56  
57  
58  
59  
60

1  
2  
3 widely studied in SA, despite the researchers' observation that it continues to present a  
4  
5 significant and sometimes life-threatening challenge. Another study conducted in SA  
6  
7 described the treatment of 42 catatonic patients with ECT.[10] The current study represents  
8  
9 the first stages of aiming to fill the gap in the extant research with a prospective study on  
10  
11 prevalence and predictive data.  
12  
13  
14  
15  
16

### 17 **Prevalence of catatonia in other parts of the world**

18  
19 Fink and Taylor [1] described a rate of catatonia of 10% in acutely ill psychiatric  
20  
21 patients and Stuivenga and Morrens [2] a rate of 16.9% when applying the DSM-5 criteria.  
22  
23 Conditions found in association with a catatonic presentation have included psychiatric  
24  
25 diagnoses like bipolar disorder, delirious mania, psychotic depression, schizophrenia, and  
26  
27 other medical conditions.[6, 2] In some instances, the cause leading to catatonia has been less  
28  
29 well-defined. DSM-5 has captured the multiple possible associations that occur with catatonia  
30  
31 by including it as a specifier for mood disorders and schizophrenia or as linked to another  
32  
33 medical condition.[11] Catatonia also appears as an entity with undefined aetiology under  
34  
35 'catatonia not otherwise specified'. [8]  
36  
37  
38  
39  
40  
41  
42

### 43 **Choice of screening tool and rating scale**

44  
45 In 1996, Bush et al. designed the Bush Francis Catatonia Screening Instrument  
46  
47 (BFCSI) a 14-item scale for screening for catatonia and a 23-item scale for rating severity of  
48  
49 catatonia.[3, 12] They demonstrated that the scales were reliable and valid tool for diagnosis  
50  
51 and evaluation of response to treatment. The scales have a dual utility of screening and  
52  
53 measurement of the severity of catatonia. A systematic review of seven catatonia rating scales  
54  
55 reported a similar finding when comparing the BFCRS with other tools to screen for  
56  
57  
58  
59  
60

1  
2  
3 catatonia.[13] They recommend the BFCRS for routine use because of ease of use, reliability,  
4 and validity. Wilson et al.[14] found 300 out of 339 patients with acute medical and  
5  
6  
7  
8  
9  
10  
11  
12  
13  
14  
15  
16  
17  
18  
19  
20  
21  
22  
23  
24  
25  
26  
27  
28  
29  
30  
31  
32  
33  
34  
35  
36  
37  
38  
39  
40  
41  
42  
43  
44  
45  
46  
47  
48  
49  
50  
51  
52  
53  
54  
55  
56  
57  
58  
59  
60

catatonia.[13] They recommend the BFCRS for routine use because of ease of use, reliability, and validity. Wilson et al.[14] found 300 out of 339 patients with acute medical and psychiatric illness screened positive for catatonia when applying the BFCRS.

The BFCSI and BFCRS have been used successfully in the MHU as screening and rating scales for the past seven years in the MHU which is the site of the current study. Other reasons supporting the utility of the scales in this study are: 1) the reported ease of use, 2) reliability, 3) validity as both a screening tool and a measure of severity, and 4) its use since 2011 in the study site has not yielded any issues with applicability or appropriateness when used in this clinical setting. Figure 1 reflects the assessment tools and process that will be applied to assess participant and collect data.

### **Management of catatonia**

The biological treatment for catatonia has advanced over the last century, from insulin coma therapy of the early 1930s and Meduna's use of seizure-inducing camphor oil injections to Cerletti's first documented use of an electric shock procedure in 1938.[1] Available evidence on management of catatonia includes the published works from various researchers.[1, 6, 7, 9,14-19] Lorazepam and ECT are the current recommended treatments, irrespective of aetiology. They are effective in most cases.[1, 7, 9, 14, 17]

In both in the White and Robins[9] and Fricchione et al.[7] case series, intravenous administration of benzodiazepines (diazepam or lorazepam) was demonstrated as an efficacious treatment for catatonia. Response is seen relatively rapidly, i.e. within minutes of administration. Instead of a sedative effect that one observes with the administration of benzodiazepines in non-catatonic patients, those with catatonia tend to 'wake up' from stupor



1  
2  
3 or normalise from a state of extreme excitement. In the White and Robins[9] study, two  
4  
5 patients who did not receive intravenous benzodiazepines died.  
6  
7  
8  
9

10 The dose range used at the study site tends to be higher and is given more frequently  
11 compared to the recommendation in the Rasmussen et al. paper.[19] This is mainly because  
12 patients at the site present at advanced stages of catatonia and tend to respond slowly or not at  
13  
14 all when the lower or less frequent doses are employed.  
15  
16  
17  
18  
19

### 20 21 **The subjective experience of catatonia**

22  
23 Northhoff et al.[20] conducted a retrospective study on 24 catatonic patients post-  
24 recovery after a catatonic episode. The patients reported intense emotions which could not be  
25 controlled and ambivalence with less focus on their altered movements. Other descriptions of  
26 catatonia have stated an extreme fear response characterized by freezing, likened to the  
27 defence seen in animals of tonic immobility or freezing in the face of danger.[21]  
28  
29  
30  
31  
32  
33  
34  
35  
36  
37

38 This study will investigate the subjective experience of catatonia as described by  
39 participants once discharged from the hospital, to shed light on the emotive and cognitive  
40 experience of catatonia in the study cohort. This may provide clues on the psychological  
41 drivers of the catatonic response and could pave the way for further research into the  
42  
43 psychology of the catatonic response.  
44  
45  
46  
47  
48  
49  
50

### 51 **Aims**

52 This study aims to determine the prevalence of catatonia in an acute mental health  
53 unit in urban South Africa and research its assessment and management in this setting.  
54  
55  
56  
57  
58  
59  
60

## Objectives

The two main research objectives are:

1. Screening of consenting participants admitted to the mental health unit in Dora Nginza Hospital using the BFCSI for catatonia, over a 12-month period from the 1<sup>st</sup> of September 2020 to the end of August 2021, to describe the prevalence of catatonia in this setting.
2. Description of demographic and clinical information, including response to treatment, in participants diagnosed with catatonia based on their BFCSI scores and clinical assessments performed by the admitting doctor.

Response to treatment will be according to the following parameters: A 50% reduction in signs and symptoms will be considered a response while a 100% reduction will be a considered a full resolution. Conversely, a reduction in symptoms of less than 50% will be regarded as a suboptimal response and a reduction that is more than 50% but less than 100% will be a response but without full resolution. In addition, significant clinical correlates and risk factors in participants with catatonia will be described, and participants with catatonia will be followed up once discharged at one month, two months, and three months intervals, to assess outcomes using the BFCSI and information about readmission or recurrence of any episode of mental illness. The association that will be looked at is between catatonia and demographic or clinical correlates such as age, gender, DSM 5 diagnosis, substance use, vitamin 12 deficiency and food insecurity and other co-occurring medical conditions. Participant's experience of catatonia once it has resolved will also be described.

## Research design

This is a prospective, descriptive triangulation study utilising mixed quantitative and

1  
2  
3 qualitative methods. An exploratory qualitative aspect will investigate the emotive and  
4  
5 cognitive subjective experience of participants with catatonia to establish a direction for  
6  
7 further research. This is because there is currently limited data available on the subjective  
8  
9 experience of catatonia, with most research focusing on quantitative aspects.  
10  
11  
12  
13  
14

15 The quantitative elements of the study will include data collected from participant  
16  
17 files of BFCSI scores upon admission, with additional clinical and demographic information  
18  
19 collected via a pre-designed datasheet (see Appendix 1). The qualitative element will  
20  
21 describe the participant's reported experience of the catatonic episode, post-discharge.  
22  
23  
24  
25

## 26 **METHODS AND ANALYSIS**

27

28 The study will take a positivist paradigm approach to investigate the potential causal  
29  
30 relationships between catatonia and different variables via correlational studies.[22]  
31  
32 Creswell[23] described the positivist's approach as an attempt to identify causes, which  
33  
34 influence outcomes, the aim being to formulate laws, thus yielding a basis for prediction and  
35  
36 generalisation. In the current study, deductive reasoning will be applied to data collected  
37  
38 through 1) direct observation and 2) quantitative and qualitative approaches, to identify  
39  
40 associations with catatonia, causal relationships, and possibly, predictors of catatonia.[22]  
41  
42  
43  
44  
45  
46

47 Sources of information that will be utilised for triangulation include: the participants'  
48  
49 BFCSI/ BFCRS scores (see Appendix 2) and clinical notes; field notes taken by the research  
50  
51 team during direct observation and interviews; and participant and relative interviews  
52  
53 focusing on response to treatment, food insecurity, and the subjective experience of catatonia.  
54  
55 Additionally, the mixed methods nature of the study will enable the generation of both  
56  
57  
58  
59  
60

1  
2  
3 objective (as documented by treating and research teams) and subjective data regarding the  
4  
5 experience of catatonia. This type of triangulation is an important tool for meeting the goals  
6  
7 of this study while facilitating a holistic assessment of catatonia in this cohort.  
8  
9

### 10 11 12 **The study process and outline**

13  
14  
15 Two research assistants (RAs) with a background in health will be recruited to assist  
16  
17 the researcher with fieldwork. A health background is necessary to understand the medical  
18  
19 terminology that is utilised in the clinical notes and screening tools. A part-time  
20  
21 administrative assistant will be contracted to assist with data capturing and collation.  
22  
23 Fieldwork will include the recruitment of participants and collection of data by the researcher  
24  
25 and RAs. There will be a limited follow-up component that extends to up to three months  
26  
27 following discharge from the hospital.  
28  
29

30  
31  
32  
33 The RAs will be trained by the researcher on:

- 34  
35 1) application of the BFCSI and BFCRS to ensure they are knowledgeable about the  
36  
37 screening tool and its interpretation, and  
38  
39 2) assessment of capacity to consent utilising the University of California, San Diego  
40  
41 Brief Assessment of Capacity to Consent Questionnaire (UBACC).  
42  
43

44  
45 The UBACC has been applied successfully in the Eastern and Western Cape in study  
46  
47 cohorts recruited from inpatient mental health institutions. [24, 25]  
48

49  
50 The inter-rater reliability (IRR) of the BFCRS was demonstrated to be good ( $\alpha=0.779$ )  
51  
52 in a study looking at four different instruments to assess for catatonia. [26] In the planned  
53  
54 study, training that will be provided by the lead researcher to the RAs on the use of the  
55  
56 BFCSI/BFCRS will be through:  
57  
58

- explaining the meaning of terms used in the BFCSI/BFCRS to describe clinical signs and symptoms of catatonia and
- providing a demonstration of how to elicit and document the 14-items and 23-items in the BFCSI/BFCRS, how to capture the relevant information accurately onto the data capturing form
- ensuring RAs start with practice participants initially under direct observation of the lead researcher, before starting the actual recruitment. An IRR in the range of ( $\alpha=0.61$  to 0.8) during the practice scoring will be deemed acceptable for RAs to proceed to the scoring of study participants.

Inter-rater reliability will also be addressed through ensuring that everyone has a similar understanding of all items to be rated in the screening tool and how these should be recorded.

The researcher and RAs will assess participants who meet the inclusion criteria for capacity to consent, utilising the UBACC. All those with intact capacity to consent will be requested to consider entering the study (see Appendix 3 and Appendix 4). For participants who may be assessed as lacking the capacity to consent, their closest relatives or guardians will be requested to consent on their behalf through proxy consent (proxy consent and its ethical application is further discussed in the section 'Ethics and dissemination' below). Additionally, in those assessed to lack capacity to consent, such capacity will be reviewed weekly to allow for further re-engagement on their consent to take part in the study, the ultimate aim being to change from proxy consent to personal consent as soon as potential participants have regained capacity. Data collected about any participant who chooses to withdraw from the study will be removed from the study data sets and destroyed.

1  
2  
3  
4  
5  
6 The research team will collect data from the clinical files of consenting participants  
7  
8 on BFCSI/BFCRS scores and additional descriptive and demographic information as guided  
9  
10 by the study questionnaire and study protocol. The completed data capturing forms will be  
11  
12 submitted to the administrative assistant for data collation and entry into a spreadsheet at the  
13  
14 end of each week. The assessment of new admissions will be daily on weekdays with the  
15  
16 expectation being to conduct daily screening or within the first 48-hours at least. Information  
17  
18 on clinical presentation of patients admitted over weekends will be supplemented from the  
19  
20 clinical folders. In cases where the Researcher or RAs identify possible missed catatonia, the  
21  
22 treating doctor will be provided with any additional information picked up during the  
23  
24 participants' assessment to allow for a review of the patient's clinical case and management.  
25  
26  
27  
28  
29

30  
31 During the limited follow-up period, the researcher and RAs will repeat the BFCSI  
32  
33 assessment and conduct face-to-face interviews with participants regarding their experience  
34  
35 of catatonia at one month, two months, and three months post-discharge. Recurrence of  
36  
37 symptoms or readmissions since the last discharge will be documented. The participant's  
38  
39 willingness to continue with the study will be reviewed during every visit to ensure their  
40  
41 consent remains valid throughout. Figure 2 is a summary of the study process that will be  
42  
43 followed.  
44  
45  
46  
47  
48

### 49 **Setting**

50  
51 The setting will be a 35-bed acute mental health unit in Dora Nginza Hospital, a  
52  
53 general hospital in the Eastern Cape Province in South Africa. The hospital is in Zwide, in the  
54  
55 iBhayi area of Port Elizabeth which has a population of over one million within an urban  
56  
57  
58  
59  
60

1  
2  
3 area that has a high morbidity of mental illness.[27] Close to 70% of the population is  
4  
5 comprised of working age adults between 15 and 64 years and the city has an unemployment  
6  
7 rate of close to 30%. [27] Zwide itself has a population of 238 000. [28] Health services in  
8  
9 the hospital include obstetrics and gynaecology, paediatrics, basic surgical, internal medicine,  
10  
11 and family medicine. The MHU is an acute inpatient unit offering 24-hour care to persons  
12  
13 who present with acute mental illness requiring inpatient treatment. It accepts referrals from  
14  
15 all the other hospital departments including the Accident and Emergency Department, as well  
16  
17 as referrals from primary care clinics and district hospitals in the nearby vicinity. The usual  
18  
19 period of admission ranges anything from three days to a few weeks.  
20  
21  
22

23  
24 All cases of suspected catatonia, from any of the referring departments are discussed  
25  
26 with the MHU team and prioritized for admission into the unit. Any treatment given  
27  
28 thereafter is discussed with the MHU team and documented in the patient's folder.  
29  
30  
31

### 32 33 **Sampling**

34  
35 Convenience sampling of all patients admitted to the MHU over a twelve-month  
36  
37 period (September 2020 to August 2021) will be undertaken. Contact details of all consenting  
38  
39 participants who have screened positive for catatonia will be entered into a database to enable  
40  
41 contact for future follow-up at the end of one month, two months, and three months post-  
42  
43 discharge. This information will be password encrypted.  
44  
45

46  
47 The number of patients expected to be admitted during the study period is around 1000  
48  
49 based on previous unit stats over the last three years and adjusted down slightly to  
50  
51 accommodate the effect of the COVID-19 outbreak on hospital admissions. The margin of  
52  
53 error or confidence interval will be set at 95% and the standard deviation will be set at 0.05.  
54  
55 To determine the total sample size required, the formula:  $n=N/(1+Ne^2)$  will be utilized and  
56  
57

1  
2  
3 yields a minimum sample size of 286 subjects. A further 20% (57) will be added to account  
4  
5 for data entry errors and non-responses. The appropriate sample size of participants to be  
6  
7 screened for the prevalence of catatonia in the unit is 343.  
8  
9

## 10 11 12 **Participants**

13  
14 Most people admitted to the DNH MHU are involuntary admissions under the Mental  
15  
16 Health Care Act of 2002.[29] Age of admission ranges from 13 to over 65 years because  
17  
18 there are no child, adolescent, or geriatric inpatient-specific services in the region.  
19  
20  
21  
22

## 23 24 **Inclusion criteria**

25  
26 All patients admitted to the unit during the study period will be eligible for inclusion.  
27  
28 Those who screen positive for two or more catatonic signs and symptoms on the BFCSI will  
29  
30 be included during the follow-up period for the qualitative part of the study.  
31  
32  
33  
34

## 35 36 **Exclusion criteria**

37  
38 Refusal to take part in the study, whether through the direct patient consent process or  
39  
40 the proxy consent process, will result in the exclusion of the patient.  
41  
42  
43  
44

## 45 46 **Methods of assessment and measurement**

47  
48 The BFCSI is a 14-item scale (see Appendix 2) that is used to screen for catatonia and  
49  
50 the BFCRS is a 21-item scale used to rate severity.[11] The BFCSI is used on initial  
51  
52 assessment and the full BFCRS is used to determine severity. Participants' responses to the  
53  
54 standard interventions of intravenous lorazepam administration or ECT will be documented  
55  
56 by the admitting doctor in the case notes. The research team will then capture this  
57  
58  
59  
60



1  
2  
3 information on a predesigned data collection sheet. When a patient presents with two or more  
4  
5 positive items on the BFCSI, they are deemed catatonic and further management is guided by  
6  
7 the unit protocol. A lorazepam infusion of 1mg or 2 mg is administered and a response of  
8  
9 50% or greater reduction in the scale score verifies the diagnosis although absence of  
10  
11 verification does not exclude catatonia. The research team will capture information on  
12  
13 participant's BFCSI/BFCRS scores and other clinical data this information on a predesigned  
14  
15 data collection sheet.  
16  
17

18  
19 The clinical data that will be collected include current psychiatric diagnosis, co-  
20  
21 occurring medical conditions, any other treatment administered, history of substance use,  
22  
23 history of previous catatonic episodes, vital signs like temperature on admission, blood  
24  
25 pressure, pulse, investigations like creatinine kinase, iron levels, thyroid function tests, urea  
26  
27 and electrolytes or any other relevant clinical investigations reflected in the file which are  
28  
29 noted by the treating team to be of relevance to the current admission., and food insecurity.  
30  
31 The participants' case notes will form a primary source of information as well as direct  
32  
33 observation of the participants. Additional information will be sought from relatives if the  
34  
35 participant is unable to respond adequately to information required on food security questions  
36  
37 due to the severity of catatonic symptoms, or in those who are unable to provide the  
38  
39 additional information for whatever other reason.  
40  
41  
42  
43  
44  
45  
46

47 Regarding social determinants of mental health, current evidence indicates that those  
48  
49 who are poor or disadvantaged suffer disproportionately from common mental disorders and  
50  
51 their adverse consequences.[30] The strength of the association with poverty has at times  
52  
53 varied depending on the type of poverty measure used. Food insecurity as a poverty measure  
54  
55 is one of the factors with a consistent and strong association with common mental  
56  
57

1  
2  
3 disorders.[31] In this study, the administration of a food security questionnaire will be  
4  
5 utilised to assess the correlation of poverty to catatonia. Two food insecurity questions are  
6  
7 drawn from the USDA's 18-question Household Food Security Scale.[32] They make up The  
8  
9 Hunger Vital Sign Questionnaire, a validated two-question food insecurity screening tool  
10  
11 used in the clinical setting. The questions are:  
12  
13

- 14 1. Within the past 12 months, we worried whether our food would run out  
15 before we got money to buy more.
- 16 2. Within the past 12 months, the food we bought just did not last and we did  
17 not have money to get more.

18  
19  
20  
21  
22  
23  
24  
25  
26 During the follow-up period, participants will be asked to describe their experience of  
27  
28 the catatonic episode as well as their perception of recovery.  
29  
30

### 31 32 33 **Expected outputs**

- 34 • The 12-month prevalence rate of catatonia.
  - 35 • Descriptive and other data on presentation and assessment of catatonia in the DNH  
36 unit.
  - 37 • Data on treatment response, short-term outcomes, and subjective experience of  
38 catatonia.
  - 39 • Predictors for catatonia based on clinical correlates and other descriptive data  
40 collected.
  - 41 • Recommendations and guidelines for the management of catatonia and possible  
42 prevention strategies.
- 43  
44  
45  
46  
47  
48  
49  
50  
51  
52  
53  
54  
55  
56  
57  
58  
59  
60

## Data management and analysis

Quantitative data collected will be summarised using descriptive statistics. Categorical variables will be presented using frequency tables, percentages, and graphs. Two or more categorical variables will be compared using contingency tables (e.g. 2 X 2 Table) and the expected frequencies will be calculated to determine the type of test best suited to determine the extent of any identified relative associations. If the expected frequencies in all cells are  $\geq 5$  then the Chi-squared test will be used and if the expected frequencies are  $< 5$  in any cells, then the Fisher's exact test will be used.

Binomial logistic regression will also be conducted to determine the predictors of catatonia and to estimate the risk ratio. If the numerical data are not normally distributed, non-parametric statistics will be used (median and interquartile range). The best fitting model of multivariate analysis will be chosen through forward selection of model building. The model with the lowest Bayesian information criterion will be selected as the better model and the 95% confidence interval will be used to estimate the precision of estimates. Survival analysis will be used to determine the time to recovery and the hazard ratio (i.e. the total number and timing of each event indicating relapse in this study) will be reported for this purpose.

Qualitative data collated during the follow-up period will be analysed to elucidate the subjective experience of catatonia in this cohort. Aspects of the thematic analysis presented by Braun and Clarke [32] will be applied to identify themes. Themes will be identified through a framework approach identifying word repetition, local expressions, metaphors and similarities, differences, and keywords. A tentative hypothesis and theory regarding the

1  
2  
3 experience of catatonia will be presented based on emergent themes. Data collected during  
4 the quantitative and qualitative segments of the study will be analysed separately but  
5 compared for congruency of reported information to enhance data integration.  
6  
7  
8  
9  
10

11  
12 In summary, data integration will be in the form of:

- 13  
14  
15 i. converting information gathered from the quantitative aspects of the study into  
16 numerical information that can be processed through application of statistical methods  
17 to test for correlations and associations.  
18  
19 ii. identifying common themes through field notes taken when interviewing participants  
20 during the outpatient stage of the study.  
21  
22 iii. Assessing congruency between common themes about the subjective experience of  
23 catatonia as described by participants and commonly identified presenting symptoms  
24 as highlighted in case notes and listed in the data collection sheet. The advantage of  
25 this approach is that it strengthens the validity and reliability of the study.  
26  
27  
28  
29  
30  
31  
32  
33  
34  
35  
36  
37

### 38 **Patient and public involvement**

39  
40 No formal patient advisory committee was set up and there was no patient or public  
41 involvement in the design and planning of the study.  
42  
43  
44  
45  
46

### 47 **ETHICS AND DISSEMINATION**

48  
49 Ethics clearance has been granted for the study by the Eastern Cape Department of  
50 Health Ethics Committee (see Appendix 5 and 6), the Walter Sisulu University Research and  
51 Ethics Committee and the Nelson Mandela University Human Research Ethics Committee  
52 (see Appendix 7). The study does not have any intervention arm.  
53  
54  
55  
56  
57  
58  
59  
60

1  
2  
3  
4  
5  
6 All patients admitted to the unit will be presented with an information leaflet on the  
7  
8 study in English or Xhosa. Consent for inclusion in the study will be obtained from all  
9  
10 participants who have the capacity to consent, which will be determined through application  
11  
12 of the UBACC. Proxy consent will be sought from a relative or guardian for all patients who  
13  
14 lack the capacity to consent or are minors between the ages of 13 and 18 years of age. The  
15  
16 use of proxy consent in mental health research is applicable for those who lack the capacity to  
17  
18 consent and the nearest relative or guardian consents on their behalf. It is permissible within  
19  
20 the mental health care setting due to the challenges with capacity to consent that may exist in  
21  
22 patients with acute mental illness.[33] Proxy consent ensures that respondents' rights are  
23  
24 guarded while making it possible to include individuals or groups who may potentially  
25  
26 benefit from scientific advances gained from research. This approach is also supported by the  
27  
28 Helsinki Declaration on ethical research which states that 'for a research subject who is  
29  
30 legally incompetent, physically or mentally incapable of giving consent or is a legally  
31  
32 incompetent minor, the investigator must obtain informed consent from the legally authorised  
33  
34 representative in accordance with applicable law'.[34] The Department of Health Guidelines  
35  
36 on ethics in health research similarly state that persons should not be excluded unfairly based  
37  
38 on discrimination or disability.[35]

39  
40  
41  
42  
43  
44  
45  
46  
47 The Mental Health Care Act (MHCA) of 2002 also makes a reference as to whom  
48  
49 may be considered an associate of a patient admitted under the Mental Health Care Act: e.g. a  
50  
51 spouse, next of kin, partner, associate, parent, or guardian.[29] A similar approach will be  
52  
53 taken for this research. All data will be anonymised and stored under lock and key, with  
54  
55 access granted to the research team only.  
56  
57

## Dissemination of results

The results will be presented at feedback sessions with the Hospital Board, Eastern Cape Department of Health and at national and international congresses and may be used to compile guidelines on assessment and management of catatonia in the region. They will also be compiled as a thesis, which will be submitted for examination for a Ph.D. in Psychology at Nelson Mandela University. A research report based on the study results will be submitted to peer-reviewed journals to be considered for publication.

## ACKNOWLEDGEMENT

The authors thank Dr Sikhumbuzo Mabunda for the valuable comments and assistance provided in the data analysis section.

## REFERENCES

- 1 Fink M, Taylor MA. Catatonia: A Clinician's Guide to Diagnosis and Treatment. Cambridge: Cambridge University Press 2003.
- 2 Stuiivenga M, Morrens M. Prevalence of the catatonic syndrome in an acute inpatient sample. *Front Psychiatry* 2014;5:174. doi:[10.3389/fpsy.2014.00174](https://doi.org/10.3389/fpsy.2014.00174)
- 3 Bush G, Fink M, Petrides G, et al. Catatonia. I. Rating scale and standardized examination. *Acta Psychiatr Scand* 1996;93:129-36. doi:[10.3389/fpsy.2014.00174](https://doi.org/10.3389/fpsy.2014.00174)
- 4 Grover S, Ghosh A, Ghormode D. Do patients of delirium have catatonic features? An exploratory study. *Psychiatry Clin Neurosci* 2014;68:644-51. doi:[10.1111/pcn.12168](https://doi.org/10.1111/pcn.12168)
- 5 Luchini F, Medda P, Mariani MG, Mauri M, Toni C, Perugi G. Electroconvulsive therapy in catatonic patients: efficacy and predictors of response. *World J Psychiatry* 2015;5:182-

- 1  
2  
3 92. doi:[10.5498/wjp.v5.i2.182](https://doi.org/10.5498/wjp.v5.i2.182)  
4  
5  
6 6 Fink M, Taylor MA. The many varieties of catatonia. *Eur Arch Psychiatry Clin Neurosci*  
7  
8 2001;251:I8-I13. doi:10.1007/PL00014200  
9  
10 7 Fricchione GL, Cassem NH, Hooberman D, Hobson D. Intravenous lorazepam in  
11  
12 neuroleptic-induced catatonia. *J Clin Psychopharmacol* 1983;3:338-42.  
13  
14  
15 8 Tandon R, Heckers S, Bustillo J, et al. Catatonia in DSM-5. *Schizophr Res* 2013;150:26-  
16  
17 30. doi:[10.1016/j.schres.2013.04.034](https://doi.org/10.1016/j.schres.2013.04.034)  
18  
19  
20 9 White DA, Robins AH. An analysis of 17 catatonic patients diagnosed with neuroleptic  
21  
22 malignant syndrome. *CNS Spectr* 2000;5:58-65. doi:[10.1017/S1092852900013419](https://doi.org/10.1017/S1092852900013419)  
23  
24  
25 10 Odayar K, Eloff I, Esterhuysen W. Clinical and demographic profile of catatonic patients  
26  
27 who received electroconvulsive therapy in a South African setting. *S Afr J Psychiatr*  
28  
29 2018;24:1-5. doi:[10.4102/sajpsychiatry.v24i0.1100](https://doi.org/10.4102/sajpsychiatry.v24i0.1100)  
30  
31  
32 11 American Psychiatric Association. Diagnostic and Statistical Manual of Mental  
33  
34 Disorders: DSM- 5. Washington: American Psychiatric Association 2013.  
35  
36  
37 12 Sienaert P, Dhossche DM, Vancampfort D, et al. A clinical review of the treatment of  
38  
39 catatonia. *Front Psychiatry* 2014;5:181. doi:[10.3389/fpsy.2014.00181](https://doi.org/10.3389/fpsy.2014.00181)  
40  
41  
42 13 Sienaert P, Rooseleer J, De Fruyt J. Measuring catatonia: a systematic review of rating  
43  
44 scales. *J Affect Disord* 2011;135:1-9. doi:[10.1016/j.jad.2011.02.012](https://doi.org/10.1016/j.jad.2011.02.012)  
45  
46  
47 14 Wilson J, Niu, K, Nicholson SE, et al. The diagnostic criteria and structure of catatonia.  
48  
49 *Schizophr Res* 2015;164:256–62. doi:[10.1016/j.schres.2014.12.036](https://doi.org/10.1016/j.schres.2014.12.036)  
50  
51  
52 15 Fink M, Taylor MA. Electroconvulsive therapy: evidence and challenges. *JAMA*  
53  
54 2007;298:330-332. doi:10.1001/jama.298.3.330  
55  
56  
57 16 Fink M. What was learned: studies by the consortium for research in ECT (CORE) 1997–  
58  
59 2011. *Acta Psychiatr Scand* 2014;129:417-26. doi:[10.1111/acps.12251](https://doi.org/10.1111/acps.12251)  
60

- 1  
2  
3 17 Petrides G, Fink M, Husain MM, et al. ECT remission rates in psychotic versus  
4 nonpsychotic depressed patients: a report from CORE. *J ECT* 2001;17:244-53.  
5  
6  
7  
8 18 Rosebush PI, Hildebrand AM, Furlong BG, et al. Catatonic syndrome in a general  
9 psychiatric inpatient population: frequency, clinical presentation, and response to  
10 lorazepam. *J Clinical Psychiatry* 1990;51:357-62.  
11  
12  
13  
14  
15 19 Rasmussen SA, Mazurek MF, Rosebush PI. Catatonia: our current understanding of its  
16 diagnosis, treatment, and pathophysiology. *World J Psychiatry* 2016;6:391-8.  
17  
18  
19  
20  
21  
22  
23  
24  
25  
26  
27  
28  
29  
30  
31  
32  
33  
34  
35  
36  
37  
38  
39  
40  
41  
42  
43  
44  
45  
46  
47  
48  
49  
50  
51  
52  
53  
54  
55  
56  
57  
58  
59  
60
- 20 Northoff G, Krill W, Wenke J, et al. The subjective experience in catatonia: systematic  
study of 24 catatonic patients. *Psychiatr Prax* 1996;23:69-73.
- 21 Moskowitz AK. "Scared Stiff": catatonia as an evolutionary-based fear response. *Psychol  
Rev* 2004;111:984-1002. doi:10.1037/0033-295X.111.4.984
- 22 Scotland J. Exploring the philosophical underpinnings of research: relating ontology and  
epistemology to the methodology and methods of the scientific, interpretive, and critical  
research paradigms. *English Language Teaching* 2012;5:9-16
- 23 Creswell JW. *Research Design: Qualitative and Mixed Methods Approaches*. London:  
Sage 2009.
- 24 Campbell MM, Susser E, Mall S, et al. Using iterative learning to improve understanding  
during the informed consent process in a South African psychiatric genomics study. *PloS  
ONE* 2017;12:e0188466. doi:10.1371/journal.pone.0188466
- 25 Campbell MM, de Vries J, Mqulwana SG, et al. Predictors of consent to cell line creation  
and immortalisation in a South African schizophrenia genomics study. *BMC Med Ethics*  
2018;19:72. doi:10.1186/s12910-018-0313-2
- 26 Sarkar S, Sakey S, Mathan K, Bharadwaj B, Kattimani S, Rajkumar RP. Assessing



- 1  
2  
3 catatonia using four different instruments: Inter-rater reliability and prevalence in  
4 inpatient clinical population. *Asian J Psychiatr*. 2016;23:27-31.  
5  
6 doi:10.1016/j.ajp.2016.07.003  
7  
8  
9  
10 27 Statistics South Africa: Nelson Mandela Bay [Internet]. Republic of South Africa, c2011  
11 [cited 20 February 2020]. Available from:  
12  
13 [http://www.statssa.gov.za/?page\\_id=993&id=nelson-mandela-bay-municipality](http://www.statssa.gov.za/?page_id=993&id=nelson-mandela-bay-municipality).  
14  
15  
16  
17 28 Statistics South Africa: Statistics South Africa to release the Quarterly Labour Force  
18 Survey (QLFS), 2<sup>nd</sup> Quarter 2019 [Internet]. Republic of South Africa [cited 24 August  
19 2029]. Available from: <http://www.statssa.gov.za/?p=12358>  
20  
21  
22  
23  
24 29 Mental Health Care Act 2002 (Act no. 17 of 2002) General Regulations [Internet].  
25 Government Gazette, Republic of South Africa, 15 December 2004, No. 27117, c2004  
26 [cited 17 February 2020]. Available from:  
27  
28 [https://www.gov.za/sites/default/files/gcis\\_document/201409/a17-02.pdf](https://www.gov.za/sites/default/files/gcis_document/201409/a17-02.pdf).  
29  
30  
31  
32  
33 30 World Health Organization. Social determinants of mental health [Internet]. Geneva:  
34 World Health Organization, c2014 [cited 23 March 2020]. Available from:  
35  
36 [https://www.who.int/mental\\_health/publications/gulbenkian\\_paper\\_social\\_determinants\\_of\\_mental\\_health/en/](https://www.who.int/mental_health/publications/gulbenkian_paper_social_determinants_of_mental_health/en/).  
37  
38  
39  
40  
41  
42 31 Lund C, Breen A, Flisher AJ, et al. Poverty and common mental disorders in low-and  
43 middle-income countries: a systematic review. *Soc Sci Med* 2010;71:517–528.  
44  
45 doi:[10.1016/j.socscimed.2010.04.027](https://doi.org/10.1016/j.socscimed.2010.04.027)  
46  
47  
48  
49 32 American Academy of Pediatrics. Addressing food insecurity: a toolkit for pediatricians  
50 [Internet]. c2017 [cited 21 April 2020]. Available from: [https://frac.org/wp-](https://frac.org/wp-content/uploads/frac-aap-toolkit.pdf)  
51  
52  
53  
54 content/uploads/frac-aap-toolkit.pdf Braun V, Clarke V. Using thematic analysis in  
55 psychology. *Qual Res Psychol* 2006;3:77-101. doi:10.1191/1478088706qp063oa  
56  
57  
58  
59  
60

- 1  
2  
3 33 Mason S, Barrow H, Phillips A, et al. Brief report on the experience of using proxy  
4 consent for incapacitated adults. *J Med Ethics* 2006;32:61-62.  
5  
6 doi:10.1136/jme.2005.012302  
7  
8  
9  
10 34 World Medical Association. World Medical Association Declaration of Helsinki. Ethical  
11 principles for medical research involving human subjects. *Bull World Health Organ*  
12 2001;79:373-4.  
13  
14  
15  
16  
17 35 Department of Health, Republic of South Africa. Ethics in health research: principles,  
18 processes and structures, 2nd edition [Internet]. Pretoria: National Department of Health,  
19 c2015 [cited 23 March 2020\_\_]. Available from:  
20 <https://www.ru.ac.za/media/rhodesuniversity/content/ethics/documents/nationalguidelines>  
21 [/DOH\\_\(2015\)\\_Ethics\\_in\\_health\\_research\\_Principles,\\_processes\\_and\\_structures.pdf](https://www.ru.ac.za/media/rhodesuniversity/content/ethics/documents/nationalguidelines/DOH_(2015)_Ethics_in_health_research_Principles,_processes_and_structures.pdf).  
22  
23  
24  
25  
26  
27  
28  
29  
30

### 31 **AUTHOR CONTRIBUTIONS**

32  
33 Z Zingela conceived the idea and devised the project and its main conceptual ideas assisted  
34 by S van Wyk and M Fink. L Stroud and J Cronje supervised the development of this  
35 manuscript and provided editorial input.  
36  
37  
38  
39  
40  
41

### 42 **FUNDING STATEMENT**

43  
44 This work was supported by the South African Medical Research Council (SAMRC), grant  
45 tracking number 2017SAMRC0SIR0000157977 and an educational grant from the Health  
46 and Welfare Sector Education and Training Authority (2018/2019HWSETA219986789).  
47  
48  
49  
50  
51  
52

### 53 **COMPETING INTERESTS STATEMENT**

54  
55 The authors have no competing interests to declare.  
56  
57  
58  
59  
60

1  
2  
3  
4  
5  
6  
7  
8  
9  
10  
11  
12  
13  
14  
15  
16  
17  
18  
19  
20  
21  
22  
23  
24  
25  
26  
27  
28  
29  
30  
31  
32  
33  
34  
35  
36  
37  
38  
39  
40  
41  
42  
43  
44  
45  
46  
47  
48  
49  
50  
51  
52  
53  
54  
55  
56  
57  
58  
59  
60

Figure 1  
Assessment Tools

Figure 2  
The Study Process

For peer review only

Figure 1: Assessment Tools



Figure 2: Study Process



**APPENDICES**

**APPENDIX 1: DATA COLLECTION SHEET**

| Enrolment No:              | Tick applicable box or insert answer in area shaded in white                                                                                   |                                                               |       |                                                      |   |                                                                                  |   |                           |                                      |                                  |                                  |                                  |
|----------------------------|------------------------------------------------------------------------------------------------------------------------------------------------|---------------------------------------------------------------|-------|------------------------------------------------------|---|----------------------------------------------------------------------------------|---|---------------------------|--------------------------------------|----------------------------------|----------------------------------|----------------------------------|
| <b>Unit</b>                | <b>Is the Patient Catatonic now?</b><br>(Fill in the BFCRS item 1 to 14 to answer this question), 2 or more signs mean Yes, there is catatonia |                                                               |       |                                                      |   |                                                                                  |   |                           |                                      |                                  |                                  |                                  |
| DNH                        | If No then tick this box and fill in ONLY Sections A,G,H,I, and J                                                                              |                                                               |       |                                                      |   | If Yes then tick this box and fill in sections A, B, C, D, E, F, G, H, I, and J. |   |                           |                                      |                                  |                                  |                                  |
| <b>A. Age</b>              |                                                                                                                                                | <b>Sex</b>                                                    |       | <b>Ethnicity</b>                                     |   |                                                                                  |   | <b>1st admission</b>      | <b>Catatonic symptoms before?</b>    | <b>DSM -5 Diagnosis in file?</b> | <b>Substance Use?</b>            | <b>Another medical condition</b> |
| < 16                       | 6 - 36                                                                                                                                         | >                                                             | F (0) | M (1)                                                | B | C                                                                                | I | W                         | Yes                                  | Yes                              | Yes                              | Yes                              |
|                            | 35 - 65                                                                                                                                        |                                                               |       |                                                      |   |                                                                                  |   |                           | No                                   | No                               | No                               | No                               |
|                            |                                                                                                                                                |                                                               |       |                                                      |   |                                                                                  |   |                           | .....                                | .....                            |                                  |                                  |
|                            |                                                                                                                                                |                                                               |       |                                                      |   |                                                                                  |   |                           | No                                   | No                               | No                               | No                               |
|                            |                                                                                                                                                |                                                               |       |                                                      |   |                                                                                  |   | No of previous admissions | No of times had catatonia previously | No of previous diagnoses?        |                                  | No of medical conditions?        |
|                            |                                                                                                                                                |                                                               |       |                                                      |   |                                                                                  |   | Not known                 | Not known                            | Not known                        | Not known                        | Not known                        |
| <b>B. BFCR Scale Score</b> |                                                                                                                                                | <b>BZD Given</b><br>Yes / No<br>If yes<br>Doses given<br>1 -2 |       | <b>Name of BZD given:</b><br>Lorazepam<br>Clonazepam |   |                                                                                  |   | <b>Blood Pressure</b>     | <b>Pulse</b>                         | <b>Body Temp</b>                 | <b>Respiratory Rate/ O2 Sats</b> |                                  |
|                            |                                                                                                                                                |                                                               |       |                                                      |   |                                                                                  |   |                           | <70<br>71-100                        | <35<br>35 -37                    | <90%<br>91 – 93                  |                                  |



|                                                                          |                                      |                                                                                                       |                                   |                                    |                                                               |                            |
|--------------------------------------------------------------------------|--------------------------------------|-------------------------------------------------------------------------------------------------------|-----------------------------------|------------------------------------|---------------------------------------------------------------|----------------------------|
| <b>C. Length of time and degree of response to BZD</b>                   | 1 <sup>st</sup> hour after admission | 2-3 days                                                                                              |                                   | 4-6 days                           | <b>Degree of Response</b>                                     |                            |
|                                                                          |                                      |                                                                                                       |                                   |                                    | Mild = Less than 25% reduction in No. of symptoms             |                            |
|                                                                          | 2 to 6 hours after admission         | 7-10 days                                                                                             | 11-14 days                        | >14 days                           | Moderate = 25% to 50% reduction in No. of symptoms            |                            |
|                                                                          | 7 to 47 hours after admission        | Reason ECT was not given after the 1 <sup>st</sup> 3 days of admission (from clinical notes)<br>..... |                                   |                                    | Good = Response of more than 50% reduction in No. of symptoms |                            |
|                                                                          |                                      |                                                                                                       |                                   |                                    | Response to BZD not sustained                                 |                            |
| <b>D. ECT and response</b>                                               | Yes                                  | <b>Number of Sessions</b>                                                                             | <b>Response</b>                   |                                    | Response to ECT not sustained                                 |                            |
|                                                                          |                                      |                                                                                                       |                                   |                                    |                                                               |                            |
|                                                                          |                                      | <4                                                                                                    | Nil                               |                                    | <b>Maintenance ECT prescribed or required?</b>                |                            |
|                                                                          |                                      | 5-9                                                                                                   | Remission of catatonia            |                                    |                                                               |                            |
|                                                                          | 10-12                                | Other (specify).....                                                                                  |                                   |                                    |                                                               |                            |
| No                                                                       | >12                                  | Time to 50% improvement                                                                               | Time to full Resolution           | Yes, prescribed?                   | No, not prescribed                                            |                            |
|                                                                          |                                      | <3 days                                                                                               | <3 days                           | If so what is the No. of sessions? |                                                               |                            |
|                                                                          |                                      | 4-7 days                                                                                              | 4-7 days                          |                                    |                                                               |                            |
|                                                                          |                                      | >1 week                                                                                               | >1 week                           |                                    |                                                               |                            |
| <b>E. Duration of Catatonia prior to admission if known OR Not Known</b> | Hours to 3 days                      | <b>Duration of Catatonia Prior to admission?</b>                                                      | Any other additional information? |                                    |                                                               |                            |
|                                                                          | 4 days to 2 weeks                    | NOT known OR                                                                                          |                                   |                                    |                                                               |                            |
|                                                                          | 3 to 4 weeks                         | < 3 days                                                                                              |                                   |                                    |                                                               |                            |
|                                                                          | More than 4 weeks                    | 4 to 7 days                                                                                           |                                   |                                    |                                                               |                            |
|                                                                          |                                      | >7 days                                                                                               |                                   |                                    |                                                               |                            |
| <b>F. Type of onset</b>                                                  | Hours to days                        | Gradual                                                                                               | Fluctuating                       | <b>Mostly Excited Form?</b>        |                                                               | <b>Mostly Slowed Form?</b> |
|                                                                          |                                      |                                                                                                       |                                   |                                    |                                                               |                            |



|                                   |                                                                                                          |                   |            |                                   |                                                  |                 |           |
|-----------------------------------|----------------------------------------------------------------------------------------------------------|-------------------|------------|-----------------------------------|--------------------------------------------------|-----------------|-----------|
|                                   |                                                                                                          |                   |            | Excited/ Stereotypy/<br>Mannerism | Stupor/ Withdrawal/ Rigidity/ Mutism/<br>Staring |                 |           |
| <b>G.<br/>Food<br/>Insecurity</b> | 1. Within the past 12 months, we worried whether our food would run out before we got money to buy more. |                   |            |                                   |                                                  |                 |           |
|                                   | Often<br>True                                                                                            | Sometimes<br>true | Never true | Don't know                        | Other                                            |                 |           |
|                                   | 2. Within the past 12 months, the food we bought just didn't last and we didn't have money to get more.  |                   |            |                                   |                                                  |                 |           |
|                                   | Often<br>true                                                                                            | Sometimes<br>true | Never true | Don't know                        | Other                                            |                 |           |
| <b>H.<br/>Substances</b>          | YES                                                                                                      | NO                | Alcohol    | Cannabis                          | Amphet                                           | Heroin          | Metamphet |
|                                   |                                                                                                          |                   | Cocaine    | Opioids                           | Nicotine                                         | Other (Specify) |           |

|                                                 |                                                                                                                                                                                   |             |                                                     |                  |                                              |                      |                          |                 |                      |     |
|-------------------------------------------------|-----------------------------------------------------------------------------------------------------------------------------------------------------------------------------------|-------------|-----------------------------------------------------|------------------|----------------------------------------------|----------------------|--------------------------|-----------------|----------------------|-----|
| <b>I. Medical Illness</b>                       | No                                                                                                                                                                                | Yes         | If Yes, chose from the following if on history only |                  | If Yes, choose from the following if current |                      | If HIV                   |                 |                      |     |
|                                                 |                                                                                                                                                                                   |             | HPT                                                 | DM               | HPT                                          | DM                   | On HAART?                | No              |                      |     |
|                                                 |                                                                                                                                                                                   |             | Epilepsy                                            | HIV              | Epilepsy                                     | HIV                  | If HIV on HAART, Regime? | If HIV, CD4?    |                      |     |
|                                                 |                                                                                                                                                                                   |             | Head Trauma                                         | TB               | Head Trauma                                  | TB                   | If HIV, Viral Load?      | Other (specify) |                      |     |
|                                                 |                                                                                                                                                                                   |             | SLE or Auto/I                                       | Other (specify)  |                                              | Other (specify)      |                          |                 |                      |     |
| <b>J. Investigations:</b>                       | <b>CK (u/l)</b>                                                                                                                                                                   |             | <b>CK ≤ 200</b>                                     | <b>Fe μmol/l</b> | Fe 9 to 30                                   | <b>VitB12 pmol/l</b> | <b>B12 ≤ 107</b>         |                 | <b>Auto/I Screen</b> |     |
|                                                 | 1. CK – Creatinine Kinase<br>2. Fe – Iron<br>3. B12 – Vitamin B12<br>4. TSH – Thyroid Stimulating Hormone<br>5. T4 – Thyroid Hormone<br>6. ANF – Nuclear Factor Rheumatoid Factor | CK          | CK                                                  | Fe               | Fe                                           | B12                  | B12                      | RF              | ESR                  | ANA |
|                                                 |                                                                                                                                                                                   | 201 -1000   | ≥ 1000                                              | ≤ 9              | ≥ 30                                         | 108 - 221            | ≥ 221                    |                 |                      |     |
|                                                 |                                                                                                                                                                                   |             |                                                     |                  |                                              |                      |                          | < 14IU/ml       | < 29                 | Pos |
|                                                 |                                                                                                                                                                                   |             |                                                     |                  |                                              |                      |                          | OR > 14IU/ml    | OR > 29              | Neg |
| <b>Endocrine</b>                                | <b>TSH miu/l</b>                                                                                                                                                                  |             | ≤ 0.38                                              | ≥ 5.33           | <b>Cortisol</b>                              | ≤ 184                |                          | ≥ 618           |                      |     |
|                                                 | <b>Normal TSH</b>                                                                                                                                                                 |             | 0.38 to 5.33                                        |                  | <b>Normal (AM)</b>                           | 185 to 617           |                          |                 |                      |     |
|                                                 | <b>T4 pmol/l</b>                                                                                                                                                                  |             | ≤ 7.2                                               | ≥ 16.4           | <b>Cortisol (PM)</b>                         | ≤ 276 (pm)           |                          | ≥ 276           |                      |     |
| <b>Normal T4</b>                                |                                                                                                                                                                                   | 7.2 to 16.4 |                                                     | ≤ 276            |                                              |                      |                          |                 |                      |     |
| <b>END OF INPATIENT DATA CAPTURING SECTIONS</b> |                                                                                                                                                                                   |             |                                                     |                  |                                              |                      |                          |                 |                      |     |

**BEGINNING OF OUTPATIENT FOLLOW UP SECTION FIR PATIENTS WHO HAD CATATONIA**

| <b>K.<br/>Follow-up<br/>Period<br/>ONLY</b>                                                                                     | <b>Date of<br/>Discharge</b>                                                                                                                                                 | <b>1 month</b>                                                                                                                           | <b>2 months</b>                       | <b>3months</b> | <b>Other</b> |
|---------------------------------------------------------------------------------------------------------------------------------|------------------------------------------------------------------------------------------------------------------------------------------------------------------------------|------------------------------------------------------------------------------------------------------------------------------------------|---------------------------------------|----------------|--------------|
| Please tick the applicable box                                                                                                  | Recurrence of Catatonia?<br>Yes<br>No                                                                                                                                        | Recurrence of Catatonia?<br>Yes<br>No                                                                                                    | Recurrence of Catatonia?<br>Yes<br>No | Other?         |              |
|                                                                                                                                 | Re-Admission?<br>Yes<br>No                                                                                                                                                   | Re-Admission?<br>Yes<br>No                                                                                                               | Re-Admission?<br>Yes<br>No            | Other?         |              |
| Please describe (in your own words) your experience/ of the catatonic episode in terms of your thoughts, feelings and behaviour | Uyacelwa<br>uchaze<br>(ngawakho<br>amazwi)<br>ngamava akho<br>ngexesha<br>ubune<br>catatonia<br>ngokwengcing<br>a zakho,<br>indlela<br>obuziva ngayo<br>nezinto<br>obuzenza. | <b>PARTICIPANT RESPONSE RECORDED VERBATUM (USE AUDIO RECORDER)</b><br><br><b>Thoughts</b><br><br><b>Feelings</b><br><br><b>Behaviour</b> |                                       |                |              |

APPENDIX 2:

CATATONIA RATING SCALE

APPENDIX VII

**BUSH-FRANCIS CATATONIA RATING SCALE**

Use presence or absence of items 1-14 for screening  
Use the 0-3 scale for items 1-23 to rate severity

|                                                                                                                                                                                                                                                                                                                                                                  |                                                                                                                                                                                                                                                                                                                                                                      |
|------------------------------------------------------------------------------------------------------------------------------------------------------------------------------------------------------------------------------------------------------------------------------------------------------------------------------------------------------------------|----------------------------------------------------------------------------------------------------------------------------------------------------------------------------------------------------------------------------------------------------------------------------------------------------------------------------------------------------------------------|
| <p><b>1. Excitement:</b></p> <p>Extreme hyperactivity, constant motor unrest which is apparently non-purposeful. Not to be attributed to akathisia or goal directed agitation</p> <p>0 = Absent<br/>1 = Excessive motion<br/>2 = Constant motion, hyperkinetic without rest periods<br/>3 = Full-blown catatonic excitement, endless frenzied motor activity</p> | <p><b>2. Immobility/stupor:</b></p> <p>Extreme hypoactivity, immobile, minimally responsive to stimuli</p> <p>0 = Absent<br/>1 = Sits abnormally still, may interact briefly<br/>2 = Virtually no interaction with external world<br/>3 = Stuporous, non-reactive to painful stimuli</p>                                                                             |
| <p><b>3. Mutism:</b></p> <p>Verbally unresponsive or minimally responsive</p> <p>0 = Absent<br/>1 = Verbally unresponsive to majority of questions; incomprehensible whisper<br/>2 = Speaks less than 20 words/ 5 min<br/>3 = No speech</p>                                                                                                                      | <p><b>4. Staring:</b></p> <p>Fixed gaze, little or no visual scanning of environment, decreased blinking.</p> <p>0 = Absent<br/>1 = Poor eye contact, repeatedly gazes less than 20 seconds between shifting of attention; decreased blinking<br/>2 = Gaze held longer than 20 seconds, occasionally shifts attention<br/>3 = Fixed gaze, non-reactive</p>           |
| <p><b>5. Posturing/catalepsy:</b></p> <p>Spontaneous maintenance of posture(s), including mundane (e.g. setting or standing for long periods without reacting).</p> <p>0 = Absent<br/>1 = Less than 1 minute<br/>2 = Greater than one minute, less than 15 minutes<br/>3 = Bizarre posture, or mundane maintained more than 15 minutes</p>                       | <p><b>6. Grimacing:</b></p> <p>Maintenance of odd facial expressions.</p> <p>0 = Absent<br/>1 = Less than 10 seconds<br/>2 = Less than 1 minute<br/>3 = Bizarre expression(s) or maintained more than 1 minute</p>                                                                                                                                                   |
| <p><b>7. Echopraxia/echolalia:</b></p> <p>Mimicking of examiner's movements/speech.</p> <p>0 = Mimicking of examiner's movements/speech<br/>1 = Occasional<br/>2 = Frequent<br/>3 = Constant</p>                                                                                                                                                                 | <p><b>8. Stereotypy:</b></p> <p>Repetitive, non-goal-directed motor activity (e.g. finger-play; repeatedly touching, patting or rubbing self); abnormality not inherent in act but in frequency.</p> <p>0 = Absent<br/>1 = Occasional<br/>2 = Frequent<br/>3 = Constant</p>                                                                                          |
| <p><b>9. Mannerisms:</b></p> <p>Odd, purposeful movements (hopping or walking tiptoe, saluting passers-by or exaggerated caricatures of mundane movements); abnormality inherent in act itself.</p> <p>0 = Absent<br/>1 = Occasional<br/>2 = Frequent<br/>3 = Constant</p>                                                                                       | <p><b>10. Verbigeration:</b></p> <p>Repetition of phrases or sentences (like a scratched record).</p> <p>0 = Absent<br/>1 = Occasional<br/>2 = Frequent<br/>3 = Constant</p>                                                                                                                                                                                         |
| <p><b>11. Rigidity:</b></p> <p>Maintenance of a rigid position despite efforts to be moved, exclude if cog-wheeling or tremor present.</p> <p>0 = Absent<br/>1 = Mild resistance<br/>2 = Moderate<br/>3 = Severe, cannot be repositioned</p>                                                                                                                     | <p><b>12. Negativism:</b></p> <p>Apparently motiveless resistance to instructions or attempts to move/examine patient. Contrary behavior, does exact opposite of instruction</p> <p>0 = Absent<br/>1 = Mild resistance and/or occasionally contrary<br/>2 = Moderate resistance and/or frequently contrary<br/>3 = Severe resistance and/or continually contrary</p> |
| <p><b>13. Waxy Flexibility:</b></p> <p>During repositioning of patient, patient offers initial resistance before allowing himself to be repositioned, similar to that of a bending candle.</p> <p>0 = Absent<br/>3 = Present</p>                                                                                                                                 | <p><b>14. Withdrawal:</b></p> <p>Refusal to eat, drink and/or make eye contact.</p> <p>0 = Absent<br/>1 = Minimal PO intake/interaction for less than 1 day<br/>2 = Minimal PO intake/interaction for more than 1 day<br/>3 = No PO intake/interaction for 1 day or more.</p>                                                                                        |

## BUSH-FRANCIS CATATONIA RATING SCALE (CONT.)

|                                                                                                                                                                                                                                                                                                                                |                                                                                                                                                                                                                                                                                                        |
|--------------------------------------------------------------------------------------------------------------------------------------------------------------------------------------------------------------------------------------------------------------------------------------------------------------------------------|--------------------------------------------------------------------------------------------------------------------------------------------------------------------------------------------------------------------------------------------------------------------------------------------------------|
| <p><b>15. Impulsivity:</b></p> <p>Patient suddenly engages in inappropriate behavior (e.g. runs down hallway, starts screaming or takes off clothes) without provocation. Afterwards can give no, or only a facile explanation.</p> <p>0 = Absent<br/>1 = Occasional<br/>2 = Frequent<br/>3 = Constant or not redirectable</p> | <p><b>16. Automatic obedience:</b></p> <p>Exaggerated cooperation with examiner's request or spontaneous continuation of movement requested.</p> <p>0 = Absent<br/>1 = Occasional<br/>2 = Frequent<br/>3 = Constant</p>                                                                                |
| <p><b>17. Mitgehen:</b></p> <p>"Anglepoise lamp" arm raising in response to light pressure of finger, despite instruction to the contrary.</p> <p>0 = Absent<br/>3 = Present</p>                                                                                                                                               | <p><b>18. Gegenhalten:</b></p> <p>Resistance to passive movement which is proportional to strength of the stimulus, appears automatic rather than willful.</p> <p>0 = Absent<br/>3 = Present</p>                                                                                                       |
| <p><b>19. Ambitendency:</b></p> <p>Patient appears motorically "stuck" in indecisive, hesitant movement.</p> <p>0 = Absent<br/>3 = Present</p>                                                                                                                                                                                 | <p><b>20. Grasp reflex:</b></p> <p>Per neurological exam</p> <p>0 = Absent<br/>3 = Present</p>                                                                                                                                                                                                         |
| <p><b>21. Perseveration:</b></p> <p>Repeatedly returns to same topic or persists with movement.</p> <p>0 = Absent<br/>3 = Present</p>                                                                                                                                                                                          | <p><b>22. Combativeness:</b></p> <p>Usually in an undirected manner, with no, or only a facile explanation afterwards.</p> <p>0 = Absent<br/>1 = Occasionally strikes out, low potential for injury<br/>2 = Frequently strikes out, moderate potential for injury<br/>3 = Serious danger to others</p> |
| <p><b>23. Autonomic abnormality:</b></p> <p>Circle: temperature, BP, pulse, respiratory rate, diaphoresis.</p> <p>0 = Absent<br/>1 = Abnormality of one parameter [excluding pre-existing hypertension]<br/>2 = Abnormality of two parameters<br/>3 = Abnormality of three or more parameters</p>                              | <p><b>TOTAL:</b> _____</p>                                                                                                                                                                                                                                                                             |

**APPENDIX 3: INFORMED CONSENT FORM INFORMED CONSENT – ENGLISH**

INFORMED CONSENT FOR A STUDY ON CATATONIA

Dear Participant or Relative

We are requesting your consent to enroll you in a study on catatonia and how the symptoms respond to the treatment you are going to be given.

---

**YES, I AGREE TO BE ENROLLED**

I .....  
 agree in **voluntarily** taking part in the study as explained to me by the doctor/ nurse

**OR**

(In cases where the patient is incapable of giving consent but is not opposed to taking part in the study, then a relative or custodian may provide informed consent by also signing below)

I ..... being the .....of  
 ..... **willingly** agree that he/she may take part in the study which has been explained to us by the doctor/ nurse

Signature of participant/relative/ custodian:

.....

Signed by ..... at.....on the  
 ..... of.....2019

---

**NO, I DO NOT AGREE TO BE ENROLLED**

I .....

do not agree in taking part in the study as explained to me by the doctor/ nurse OR

I ..... being the .....of  
 ..... do not agree that he/she may take part in the study which has been  
 explained to us by the doctor/ nurse

**Signature of participant/relative/ custodian:**

.....

**FOR OFFICE USE ONLY: ASSESSMENT OF CAPACITY TO CONSENT BASED ON UBACC**

| <i>Does the patient....</i>                                             | <i>Yes</i> | <i>No</i> |
|-------------------------------------------------------------------------|------------|-----------|
| <i>1. Understand the information relevant to the decision?</i>          | .....      | .....     |
| <i>2. Retain the information long enough to consider it?</i>            | .....      | .....     |
| <i>3. Weigh the information as part of the decision-making process?</i> | .....      | .....     |
| <i>4. Communicate their decision in some way?</i>                       | .....      | .....     |

*Please Note: Should there be a no answer to any of the 4 questions above then the patient lacks capacity to consent and a relative or custodian may then be requested to provide informed consent.*

1  
2  
3  
4 **INFORMED CONSENT - ISIXHOSA**  
5  
6

7 **IPHEPHA-MVUME LOPHANDO NGESIGULO SE-CATATONIA**  
8  
9

10  
11 *Mthathi-nxaxheba obekekileyo okanye Mzali okanye sizalwane esibekileyo*  
12  
13

14 Sicela imvume yakho yokuphanda nzulu ngeempawu zesi sigulo i-catatonia, nokuba unyango  
15 ozakulufumana luzakusebenzela njani na.  
16

17 Ndiye ndanikwa iphepha elichaza ngolu phando kwaye ndiluchazelwe ngu  
18  
19 .....

20  
21  
22  
23  
24  
25 **EWE NDIYAVUMA**  
26

27  
28 Mna (faka igama lakho apha) .....  
29 ndiyazikhethela ukulungenela olu phando ndiluchazelwe ngugqirha okanye umongikazi, kwaye  
30 andinyanzeliswanga.  
31  
32

33 **OKANYE**  
34  
35

36  
37 Ukuba umntu akakwazi ukunika imvume ngasizathu sithile, kodwa abe engali ukulungenela  
38 uphando, kungatyikitya umzali okanye isizalwane  
39

40 Isayinwe ngu..... e..... ngomhla we.....  
41  
42 kwinyanga ye.....ku 2019  
43  
44

45 **HAYI NDIKHETHA UKUNGALUNGENELI OLU PHANDO**  
46

47 Mna (faka igama lakho apha) ..... ndikhetha ukuba ndingalungeni olu phando  
48 ndiluchazelwe ngugqirha okanye umongikazi  
49

50 Mna ndingu.....(Chaza uhlobene njani nomthathi-nxaxheba)  
51 ka.....(igama lomthathi nxaxheba)  
52  
53  
54  
55  
56  
57  
58  
59  
60



1  
2  
3  
4 Isaynwe e..... ngomhla we..... kwinyanga ye.....ku  
5 2019

6  
7 Utyikitya apha wena okanye umzali okanye isizalwane  
8  
9 .....

## 12 APPENDIX 4: INFORMATION LEAFLETS IN ENGLISH AND XHOSA

### 14 4.1 - INFORMATION LEAFLET (XHOSA)

#### 17 **Iphepha lokwazisa umthathi-nxaxheba kuphando lwesigulo i-Catatonia**

18 Mthathi-nxaxheba obekekileyo okanye Mzali okanye sizalwane esibekekileyo

19 Ngale ncwadi sikwazisa malunga ngophando nzulu oluqhutywa ziinzululwazi ezifuna ukufunda nzulu  
20 ngesigulo ekuthiwa yi-catatonia kweli ziko lempilo. Unyango obuhleli uzakulufumna alusayi kutshintsha  
21 okanye luphazamiseke wakuthatha inxaxheba kolu phando.

#### 24 **Yintoni i-catatonia?**

25 I-catatonia sisigulo esiye sibangele ukuphazamiseka kwindlela umntu ashukuma ngayo apha emzimbeni.  
26 Kwabanye abantu sibangela ukuba umzimba lo ucothe kakhulu okanye ungakwazi kushuma, umntu azive  
27 eqinile, athi nokuba uyafuna ukushumisa umzimba wakhe njengesiqhelo angakwazi. Ide ibangele loo nto  
28 ngelinye ixesha ukuba umntu aphelele ehleli ndawoninye okanye emile ndawoninye de kugqithe imizuzu  
29 emininzi okanye iiyure zibe liqela. Iyakwazi nokubangela ukuba umntu angakwazi ukuphuma  
30 kwasebhedini, angakwazi kuzityisa, angakwazi kuzihlamba, asoloko elele ebhedini okanye ehleli  
31 esitulweni.

32 Kwelinye icala i-catatonia iyakwazi ukubangela ukuba umntu athi ngoku sele eqalile ukushukuma esithi  
33 wenza into ethile, suka umzimba lo uqine, aphelele amalungu omzimba afana neengalo, izandla, imilenze  
34 okanye iinyawo zilenga emoyeni angakwazi ukuyigqibezela laa nthsukumo ebeyiqalile. Intamo nentloko  
35 nazo ziyakwazi ukuphetha zikekele ngenxa yoku kuqina komzimba kuvela ngesiquphe.

36 Okokugqibela, i-catatonia iyakwazi ukuphinda ibangele intshukumo engaphaya kunesiqhelo, aphelele  
37 umntu eshuku-shukuma kakhulu, angahlali ndawonye okanye angazinzi. Abanye baye bazule ndawoninye,  
38 abanye baqhwabe izandla unomphelo okanye banqwale kungenjalo baninike intloko into engapheliyo.  
39 Iyakwazi nokuvela ngokuba omnye umntu abetha-bethe amanqindi emoyeni, omnye athi nokuba  
40 usebhedini kube ngathi unyomfa ibhaysikili into engapheliyo. Babakhona nabaphetha bethetha into enye,  
41  
42  
43  
44  
45  
46  
47  
48  
49  
50  
51  
52  
53  
54  
55  
56  
57  
58  
59  
60

okanye benze isikhalo esiphindaphindwayo okanye nayiphina intsholo abaye bayiqhube imizuzu emininzi okanye iiyure zide zibe liqela. Bakhona ke nabanye abaye balinganise loo nto ithethwa ngumntu ophambi kwabo kungenjalo balinganisa loo nto bayibona isenziwa ngumntu ophambi kwabo.

### **Ibangelwa yintoni i-catatonia?**

I-catatonia iyakwazi ukubangelwa zizigulo ezithile zengqondo kungenjalo nezinye izigulo zomzimba ziyakwazi ukuhamba ne-catatonia. Ingxaki esiye siyifumane thina boogqirha neenzululwazi kukungazi xa siqala ukumbona umntu onale catatonia ukuba ingaba eyakhe ibangelwa sisigulo sengqondo na okanye sesomzimba kusini na. Yiloo tno side sabona ukuba kungakuhle ukuba sinokuyiphonononga nzulu le ngxaki.

### **Luqulethe ntoni olu phando?**

Sijonge ekubeni wonke umntu oze kulaliswa kweli candelo, ahlolwe, kukhangelwe ukuba akahlaselwanga ziimpawu ezithile zale-catatonia kusini na. Wothi uhlolwe ngugqirha wakho ebehleli ezakuhlola kakade. Ukuba zikhona iimpawu ezithile ugqirha acinga ukuba uziqaphele apha kuwe, usenakho ukubuza ngazo umzekelo mhlawumbi ukuba ziqale nini, njani, kwaye ingaba uyaqala ukuba nazo na njalonzalo. Uzakube phofu ebhala loo nto umxelela yona. Apha ekubhaleni kwakhe kodwa akazokulibhala igama lakho nokuba ungubani kwaye uhlala phi. Oku kuhlolwa nokubuzwa nge-catatonia kungathatha imizuzu emihlanu ukuya kweli shumi kuphela. Ulwazi esilulokelelayo ngawe kukuba nje iimpawu zesi sigulo unazo na kwaye nale mibuzo sesiyikhakanyile kuphela.

Zimbini izinto esifuna ukuziqwalasela kolu phando nge-catatonia:

1. Ingaba bangaphi abantu abafunyanwa sesi sigulo kule ngingqi?

2. Ingaba zikhona izinto ezingunobangela wokuba abanye abantu bafunyanwe sesi sigulo abanye basinde, mhlawumbi njengobubudala bomntu, isini okanye ezinye izigulo zomzimba?

Nayiphi na into esinokuyifunda eyongezelela kulwazi esele sinalo ngesi-sigulo ingasinceda kakhulu ekubeni sikwazi ukusinyanga ngcono kwixa elizayo. Ngako oko ubukho bakho nokuthatha kwakho inxaxheba kolu phando kuya kunceda abantu abaninzi abanokuthi bafunyanwe sesi sigulo.

Alukho olunye uvavanyo oza kulwenza oludibene nolu phando. Naluphi na olunye uvavanyo okanye unyango ozakuthi ulufumane emva kokuba umongikazi okanye ugqirha egqibile ukukuhlola, lunyango lwesiqhelo obuhleli uzakulufumana kakade kugirha wakho.

1  
2  
3  
4  
5  
6 **Ukuba ndifunyaniswe ndinazo imipawu ze-catatonia loo nto ithetha ukuthini?**

7 Ukuba ufunyaniswe unazo ezinye zezi mpawu ze-catatonia, ugqira wakho wokunika unyango lakho  
8 lwesiqhelo okanye enze uvavanyo ebehleli ezakulwenza kakade olunxulumene nempilo yakho.  
9

10  
11  
12  
13 **Kuza kwenziwa ntoni ngeziphumo zolu phando?**

14 Iziphumo zolu phando zizakudityaniswa zibhalwe kufndiswe abanye oogqirha neenzululwazi malunga nesi  
15 sigulo, kwiinkomfa zoogqirha neenzululwazi.  
16

17  
18  
19  
20 **Ndithini ukuba ndinemibuzo?**

21 Ukuba unemibuzo ngolu phando, cela ukuthetha nogqirha wakho okanye umongikazi ozakube encedisa  
22 kolu phando.  
23

24  
25  
26 **Siyabulela!**

27 Sibulela kakhulu ngexesha lakho nokuzixhesha kwakho ngolu phando.  
28  
29

30  
31 **4.2 - INFORMATION LEAFLET (ENGLISH)**

32  
33  
34 **Information Leaflet about a Study of Catatonia**

35  
36  
37  
38  
39  
40 Dear Participant / Parent/ Relative

41  
42  
43  
44 This leaflet is provided to inform you about a study being conducted by researchers who would like to  
45 investigate a condition called catatonia at his health facility. The usual care you were going to get will not  
46 be changed or disturbed through taking part in this study.  
47  
48

49  
50 **What is catatonia?**

51  
52 Catatonia is a condition that affects the way a person moves his whole body or body parts. In some people  
53 it slows down the body considerably to the point where some will stop moving completely, causing the  
54 person to feel very stiff such that they are unable to move even when they want to. This may lead to a  
55  
56  
57  
58  
59  
60

1  
2  
3  
4 person remaining in one position for a very long time (whether sitting or standing) to the point of many  
5 minutes or even hours. It can even cause some people to be bedridden, unable to feed themselves, or wash  
6 or attend to other daily needs.  
7  
8

9  
10  
11 Catatonia can also cause a person to appear frozen even after initiating a particular action, resulting in body  
12 parts like legs, arms hands or feet being frozen in awkward or unusual looking positions. The head and or  
13 neck may also be tilted at awkward angles. The change in movement can often occur suddenly.  
14  
15

16  
17  
18 Lastly catatonia can also cause an abnormality of excessive movement which is more than normal. A  
19 person may show excessive movement that lasts up to many minutes or hours with a seeming inability to  
20 stay still. Some people may pace up and down, others may clap or wave for long periods lasting minutes to  
21 hours, while others may show head nodding, head shaking, grimacing, etc. Some people have been seen to  
22 do shadow boxing or cycling movements even when lying down. It may also appear as repetitive speech of  
23 the same phrase, a cry or shout or other odd sound that can last for hours. Others may repeat what they hear  
24 around them non- stop or they may mimic actions of those around them as well.  
25  
26  
27  
28  
29

### 30 **What causes catatonia?**

31  
32  
33 Catatonia may be seen with a number of mental illnesses but it can also be associated with some other  
34 medical conditions. The problem we run into as doctors is when a person presents with the first time with  
35 this syndrome it may be difficult in the beginning to know what the underlying cause is i.e. whether the  
36 cause is a mental condition or another medical condition. This is why conducting research on catatonia is  
37 so important.  
38  
39  
40  
41  
42

### 43 **What does this research involve?**

44  
45 We are looking at ensuring that everybody who is admitted into this unit s examined and screened for  
46 symptoms and signs of catatonia. Your admitting doctor will examine you as usual, which will include an  
47 initial screen for catatonia through examination only. Following this, a trained research assistant who is a  
48 nurse will proceed to do a full screen using a rating scale, to ensure that no other signs of catatonia were  
49 missed. If the research assistant finds any additional signs of catatonia, they will tell your treating doctor. In  
50 addition, the nurse may ask you questions like when did the symptoms start and how fast did they appear  
51 etc. She or he will note down you answers but will not include details like your name or your address which  
52  
53  
54  
55  
56  
57  
58  
59  
60

1  
2  
3  
4 can identify who you are. This further screening by the nurse not expected to take longer than 5 to 10  
5 minutes. The information to be collected for the study about your condition is about the signs and  
6 symptoms and the few questions already mentioned to do with the illness, nothing more. There are two  
7 questions we would like to investigate about catatonia:  
8  
9

10  
11 1. How many people experience this condition in this area?  
12

13  
14 2. Are there particular characteristics that make some people more prone to it and others less  
15 vulnerable to it like age, gender or other medical conditions?  
16

17 Whatever we can learn about this condition, over and above what we know already will help us to come up  
18 with improved ways to diagnose it and to treat it in future. Taking part in this research will therefore help  
19 many people in future who may also get this illness.  
20  
21  
22

23  
24 There are no other tests you will be expected to take part in for this study. Whatever other tests or treatment  
25 interventions that follow will be those that your doctor would have undertaken anyway to help you manage  
26 your condition and get you better.  
27  
28  
29

### 30 31 **If I am found to show some of the symptoms or signs of catatonia what does that mean?** 32

33  
34  
35 If you are found to have some signs and symptoms of catatonia, the research nurse will inform your treating  
36 doctor, so that your doctor can give you the appropriate and usual treatment for your condition. Your doctor  
37 may also decide to do more tests which would be what they would have done anyway even if you were not  
38 part of the study, in order to manage your condition.  
39  
40  
41  
42

### 43 44 **What will be done with the results of the study?** 45

46 The results of the study will be collected and put together to present to scientific congresses so that other  
47 doctors and scientists can learn from them.  
48  
49

### 50 51 **What should I do if I have more questions?** 52

53 If you have more questions, ask your treating doctor or the researcher, research assistant or nurse.  
54  
55

56 **Thank you! Thank you very much for your patience and for spending the few minutes on this study.**  
57  
58  
59  
60

**APPENDIX 5: INSTITUTIONAL PERMISSIONS –DORA NGINZA HOSPITAL**

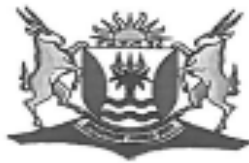

Province of  
**EASTERN CAPE**  
HEALTH

**DORA NGINZA REGIONAL HOSPITAL**

DEPARTMENT OF PSYCHIATRY & MENTAL HEALTH UNIT  
Spenith Street - Zerde - Port Elizabeth - 6205.  
Private Bag X 11851 - Port Elizabeth - 6205.  
Telephone +27 41 405 4350 - Fax +27 414054007

**DEPARTMENT OF PSYCHIATRY REQUEST FOR CEO APPROVAL OF DEPARTMENTAL RESEARCH**

|         |                                                                                |
|---------|--------------------------------------------------------------------------------|
| To      | Mr P Tsibolane<br>Chief Executive Officer<br>Dora Nginza Hospital              |
| From    | Dr A Bronkhorst, Prof S van Wyk and Prof Z Zingela<br>Department of Psychiatry |
| Subject | DEPARTMENT OF PSYCHIATRY REQUEST FOR CEO APPROVAL OF DEPARTMENTAL RESEARCH     |
| Date    | 08 November 2018                                                               |

**Introduction**

The Department of Psychiatry and Walter Sisulu University have identified research projects in catatonia as a priority for the Eastern Cape due to the severity of the illness and the potentially negative outcomes resulting from delay in recognition of the cognition

**Requested support**

CEO approval and support for the research project on Catatonia: "Catatonia as a manifestation of serious mental illness: prevalence, presentation, management and outcomes in a mental health unit", is hereby requested on behalf of the investigators to initiate this study in the Department of Psychiatry in Dora Nginza Hospital.

**Conclusion**

This project is also expected to yield support for other ongoing and planned registrar research projects on Catatonia. Thank you for considering this request.

A Bronkhorst

S van Wyk

Z Zingela

The request for approval is hereby **granted / not granted** (please delete as appropriate)

Signature: Designation: CEO Date: 08.11.18

Name: M. P. TSIBOLANE

Dora Nginza Regional Hospital  
Chief Executive Officer  
Mr M.P. Tsibolane

Signature: .....

Date: .....

## APPENDIX 6: INSTITUTIONAL PERMISSIONS

### APPROVAL FROM EC HEALTH RESEARCH COMMITTEE

#### APPENDIX VI

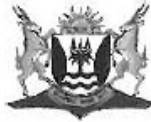

#### Eastern Cape Department of Health

Enquiries: Madoda Xokwe  
 Date: 19 December 2017  
 e-mail address: madoda.xokwe@echealth.gov.za

Tel No: 040 808 0710  
 Fax No: 043 642 1409

Dear Prof. Z. Zingela

**Re: Catatonia As A Presentation For Severe Mental Illness: Prevalence Of Catatonia In Two Mental Health Units In Urban And Rural South Africa (EC\_201712\_015)**

The Department of Health would like to inform you that your application for conducting a research on the abovementioned topic has been approved based on the following conditions:

1. During your study, you will follow the submitted protocol with ethical approval and can only deviate from it after having a written approval from the Department of Health in writing.
2. You are advised to ensure, observe and respect the rights and culture of your research participants and maintain confidentiality of their identities and shall remove or not collect any information which can be used to link the participants.
3. The Department of Health expects you to provide a progress on your study every 3 months (from date you received this letter) in writing.
4. At the end of your study, you will be expected to send a full written report with your findings and implementable recommendations to the Epidemiological Research & Surveillance Management. You may be invited to the department to come and present your research findings with your implementable recommendations.
5. Your results on the Eastern Cape will not be presented anywhere unless you have shared them with the Department of Health as indicated above.

Your compliance in this regard will be highly appreciated.

SECRETARIAT: EASTERN CAPE HEALTH RESEARCH COMMITTEE

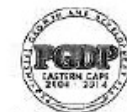

## APPENDIX 7: ETHICS APPROVAL

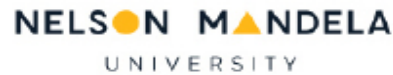

PO Box 77000, Nelson Mandela University, Port Elizabeth, 6001, South Africa [mandela.ac.za](http://mandela.ac.za)

Chairperson: Research Ethics Committee (Human)  
Tel: +27 (0)41 504 2347  
[sharlene.govender@mandela.ac.za](mailto:sharlene.govender@mandela.ac.za)

NHREC registration nr: REC-042508-025

Ref: [H20-HEA-PSY-002] / Approval]

18 August 2020

Prof L Stroud  
Faculty: Health Sciences

Dear Prof Stroud

**CATATONIA AS A MANIFESTATION OF SERIOUS MENTAL ILLNESS: PREVALENCE, PRESENTATION, MANAGEMENT AND OUTCOMES OF CATATONIA IN A MENTAL HEALTH UNIT**

PRP: Prof L Stroud  
PI: Dr Z Zingela

Your above-entitled application served at the Research Ethics Committee (Human) (meeting of 29 July 2020 2020) for approval. The study is classified as a high risk study. The ethics clearance reference number is H20-HEA-PSY-002 and approval is subject to the following conditions:

1. The immediate completion and return of the attached acknowledgement to [Imtiaz.Khan@mandela.ac.za](mailto:Imtiaz.Khan@mandela.ac.za), the date of receipt of such returned acknowledgement determining the final date of approval for the study where after data collection may commence.
2. Approval for data collection is for 1 calendar year from date of receipt of above mentioned acknowledgement.
3. The submission of an annual progress report by the PRP on the data collection activities of the study (form RECH-004 available on Research Ethics Committee (Human) portal) by 15 November this year for studies approved/extended in the period October of the previous year up to and including September of this year, or 15 November next year for studies approved/extended after September this year.
4. In the event of a requirement to extend the period of data collection (i.e. for a period in excess of 1 calendar year from date of approval), completion of an extension request is required (form RECH-005 available on Research Ethics Committee (Human) portal)
5. In the event of any changes made to the study (excluding extension of the study), completion of an amendments form is required (form RECH-006 available on Research Ethics Committee (Human) portal).
6. Immediate submission (and possible discontinuation of the study in the case of serious events) of the relevant report to RECH (form RECH-007 available on Research Ethics Committee (Human) portal) in the event of any unanticipated problems, serious incidents or adverse events observed during the course of the study.
7. Immediate submission of a Study Termination Report to RECH (form RECH-008 available on Research Ethics Committee (Human) portal) upon expected or unexpected closure/termination of study.
8. Immediate submission of a Study Exception Report of RECH (form RECH-009 available on Research Ethics Committee (Human) portal) in the event of any study deviations, violations and/or exceptions.
9. Acknowledgement that the study could be subjected to passive and/or active monitoring without prior notice at the discretion of Research Ethics Committee (Human).



1  
2  
3  
4  
5  
6  
7  
8  
9  
10  
11  
12  
13  
14  
15  
16  
17  
18  
19  
20  
21  
22  
23  
24  
25  
26  
27  
28  
29  
30  
31  
32  
33  
34  
35  
36  
37  
38  
39  
40  
41  
42  
43  
44  
45  
46  
47  
48  
49  
50  
51  
52  
53  
54  
55  
56  
57  
58  
59  
60

2

Please quote the ethics clearance reference number in all correspondence and enquiries related to the study. For speedy processing of email queries (to be directed to [Imtiaz.Khan@mandela.ac.za](mailto:Imtiaz.Khan@mandela.ac.za)), it is recommended that the ethics clearance reference number together with an indication of the query appear in the subject line of the email.

We wish you well with the study.

Yours sincerely

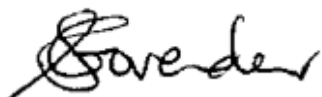

**Dr S Govender**  
**Chairperson: Research Ethics Committee (Human)**

Cc: Department of Research Development  
Faculty Manager: Health Sciences

[Appendix 1: Acknowledgement of conditions for ethical approval](#)

Peer review only

1  
2  
3  
4  
5  
6  
7  
8  
9  
10  
11  
12  
13  
14  
15  
16  
17  
18  
19  
20  
21  
22  
23  
24  
25  
26  
27  
28  
29  
30  
31  
32  
33  
34  
35  
36  
37  
38  
39  
40  
41  
42  
43  
44  
45  
46  
47  
48  
49  
50  
51  
52  
53  
54  
55  
56  
57  
58  
59  
60

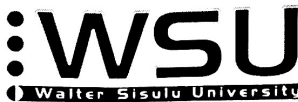

FACULTY OF HEALTH SCIENCES  
POSTGRADUATE EDUCATION, TRAINING, RESEARCH AND ETHICS UNIT

**HUMAN RESEARCH COMMITTEE  
CLEARANCE CERTIFICATE**

PROTOCOL NUMBER : 067/2017  
  
PROJECT : PREVALENCE OF CATATONIA IN TWO MENTAL HEALTH UNITS IN URBAN AND RURAL SOUTH AFRICA  
  
INVESTIGATOR(S) : PROF Z ZINGELA  
  
DEPARTMENT : PSYCHIATRY & BEHAVIOURAL SCIENCES  
  
DECISION OF THE COMMITTEE : APPROVED  
  
DATE OF APPROVAL : 07 MAY 2020  
  
DURATION : 1 YEAR (07 MAY 2020 – 07 MAY 2021)  
  
CONDITIONS : NONE

**N.B** You are required to provide the committee with a progress or outcome report of the research after every 6 months. The committee expects a report on any changes in the protocol as well as any untoward events that may occur at any time during the study not later than 7 days of knowing as the investigator/s.

**WALTER SISULU UNIVERSITY**  
ACADEMIC HEALTH SERVICE COMPLEX OF THE  
EASTERN CAPE  
POSTGRADUATE EDUCATION AND TRAINING  
FACULTY OF HEALTH SCIENCES  
WALTER SISULU UNIVERSITY  
P/BAG X 1, WSU, 5117, E.C  
TEL: (047) 502 2100 / FAX: (047) 502 2101

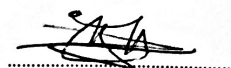  
.....  
DR EJ NDEBIA  
CHAIRPERSON

07.05.2020  
.....  
DATE

**DECLARATION OF INVESTIGATOR(S)**

(To be completed in duplicate and one copy returned to the Research Officer at Office AB 02 GF 03 Administration Building, Sisson Street Campus, Fort Gale, Mthatha, WSU)

I/We fully understand the conditions under which I am/we are authorized to carry out the abovementioned research and I/we guarantee to ensure compliance with these conditions. Should any departure to be contemplated from the research procedure as approved I/we undertake to resubmit the protocol to the Research Ethics Committee. I/We agree to a completion of a 6-monthly/ yearly progress report. The committee reserves the right to withdraw approval in the event that there are serious ethical violations.

..... (Signature)  
N. B. Please quote the protocol number in all enquiries.

..... (Date)

1  
2  
3  
4  
5  
6  
7  
8  
9  
10  
11  
12  
13  
14  
15  
16  
17  
18  
19  
20  
21  
22  
23  
24  
25  
26  
27  
28  
29  
30  
31  
32  
33  
34  
35  
36  
37  
38  
39  
40  
41  
42  
43  
44  
45  
46  
47  
48  
49  
50  
51  
52  
53  
54  
55  
56  
57  
58  
59  
60

For peer review only
