# Supplementary material for: Protocol for a prospective descriptive prevalence study of catatonia in an acute mental health unit in urban South Africa
Source: PubMed Central journal article supplement — BMJ Open. 2020 Nov 6;10(11):e040176. doi: 10.1136/bmjopen-2020-040176 (PMC7651726; doi:10.1136/bmjopen-2020-040176), 2020-11-06
Supplement: bmjopen-2020-040176supp001.pdf [file bmjopen-2020-040176supp001.pdf]

## APPENDICES

## APPENDIX 1: DATA COLLECTION SHEET

| Enrolment No:       |        | Tick applicable box or insert answer in area shaded in white                                                                            |      |                                                        |       |                                               |                                                                                  |   |   |                           |                                      |                           |                           |                           |
|---------------------|--------|-----------------------------------------------------------------------------------------------------------------------------------------|------|--------------------------------------------------------|-------|-----------------------------------------------|----------------------------------------------------------------------------------|---|---|---------------------------|--------------------------------------|---------------------------|---------------------------|---------------------------|
| Unit                |        | Is the Patient Catatonic now?<br>(Fill in the BFCRS item 1 to 14 to answer this question), 2 or more signs mean Yes, there is catatonia |      |                                                        |       |                                               |                                                                                  |   |   |                           |                                      |                           |                           |                           |
| DNH                 |        | If No then tick this box and fill in ONLY Sections A,G,H,I, and J                                                                       |      |                                                        |       |                                               | If Yes then tick this box and fill in sections A, B, C, D, E, F, G, H, I, and J. |   |   |                           |                                      |                           |                           |                           |
| A. Age              |        |                                                                                                                                         |      | Sex                                                    |       | Ethnicity                                     |                                                                                  |   |   | 1st admission             | Catatonic symptoms before?           | DSM -5 Diagnosis in file? | Substance Use?            | Another medical condition |
| < 16                | 6 - 36 | 36 - 65                                                                                                                                 | > 65 | F (0)                                                  | M (1) | B                                             | C                                                                                | I | W | Yes                       | Yes                                  | Yes                       | Yes                       | Yes                       |
|                     |        |                                                                                                                                         |      |                                                        |       |                                               |                                                                                  |   |   | No                        | No                                   | Diagnosis .....           | No                        | No                        |
|                     |        |                                                                                                                                         |      |                                                        |       |                                               |                                                                                  |   |   | No of previous admissions | No of times had catatonia previously | No of previous diagnoses? | No of medical conditions? |                           |
|                     |        |                                                                                                                                         |      |                                                        |       |                                               |                                                                                  |   |   | Not known                 | Not known                            | Not known                 | Not known                 |                           |
| B. BFCR Scale Score |        |                                                                                                                                         |      | BZD Given<br>Yes / No<br>If yes<br>Doses given<br>1 -2 |       | Name of BZD given:<br>Lorazepam<br>Clonazepam |                                                                                  |   |   | Blood Pressure            | Pulse                                | Body Temp                 | Respiratory Rate/ O2 Sats |                           |
|                     |        |                                                                                                                                         |      |                                                        |       |                                               |                                                                                  |   |   |                           | <70<br>71-100                        | <35<br>35 -37             | <90%<br>91 – 93           |                           |

|                      |                            |                                                                            |                                                                        |                                                                 |                            |                            |                           |
|----------------------|----------------------------|----------------------------------------------------------------------------|------------------------------------------------------------------------|-----------------------------------------------------------------|----------------------------|----------------------------|---------------------------|
|                      | 3 - 4<br>5 or more         | Diazepam<br>Midazolam<br>Dose.....<br>....<br>Other<br>Treatment?<br>..... | <b>Systolic:</b><br><120<br>120 -139<br>140 – 180<br>181 – 220<br>>220 | <b>Diastolic:</b><br><70<br>80 -90<br>91-110<br>110-120<br>>120 | 101-120<br>121-160<br>>160 | 38 – 40<br>>40             | 94 – 96<br>97 – 99<br>100 |
| <b>Initial Score</b> | <b>1<sup>st</sup> dose</b> | <b>2<sup>nd</sup> dose</b>                                                 | <b>3<sup>rd</sup> dose</b>                                             |                                                                 | <b>4<sup>th</sup> dose</b> | <b>5<sup>th</sup> dose</b> |                           |
| <6                   | <6                         | <6                                                                         | <6                                                                     |                                                                 | <6                         | <6                         |                           |
| 6-12                 | 6-12                       | 6-12                                                                       | 6-12                                                                   |                                                                 | 6-                         | 6-12                       |                           |
| 12-24                | 12-24                      | 12-24                                                                      | 12-24                                                                  |                                                                 | 12                         | 12-24                      |                           |
| 24-36                | 24-36                      | 24-36                                                                      | 24-36                                                                  |                                                                 | 12-                        | 24-36                      |                           |
| >36                  | >36                        | >36                                                                        | >36                                                                    |                                                                 | 24                         | >36                        |                           |
|                      |                            |                                                                            |                                                                        |                                                                 | 24-                        |                            |                           |
|                      |                            |                                                                            |                                                                        |                                                                 | 36                         |                            |                           |
|                      |                            |                                                                            |                                                                        |                                                                 | >36                        |                            |                           |

|                                                                          |                                      |                                                                                                       |                                   |                                    |                                                               |                            |
|--------------------------------------------------------------------------|--------------------------------------|-------------------------------------------------------------------------------------------------------|-----------------------------------|------------------------------------|---------------------------------------------------------------|----------------------------|
| <b>C. Length of time and degree of response to BZD</b>                   | 1 <sup>st</sup> hour after admission | 2-3 days                                                                                              |                                   | 4-6 days                           | <b>Degree of Response</b>                                     |                            |
|                                                                          |                                      |                                                                                                       |                                   |                                    | Mild = Less than 25% reduction in No. of symptoms             |                            |
|                                                                          | 2 to 6 hours after admission         | 7-10 days                                                                                             | 11-14 days                        | >14 days                           | Moderate = 25% to 50% reduction in No. of symptoms            |                            |
|                                                                          | 7 to 47 hours after admission        | Reason ECT was not given after the 1 <sup>st</sup> 3 days of admission (from clinical notes)<br>..... |                                   |                                    | Good = Response of more than 50% reduction in No. of symptoms |                            |
|                                                                          |                                      |                                                                                                       |                                   |                                    | Response to BZD not sustained                                 |                            |
| <b>D. ECT and response</b>                                               | Yes                                  | <b>Number of Sessions</b>                                                                             | <b>Response</b>                   |                                    | Response to ECT not sustained                                 |                            |
|                                                                          |                                      |                                                                                                       | <4                                | Nil                                | <b>Maintenance ECT prescribed or required?</b>                |                            |
|                                                                          |                                      | 5-9                                                                                                   | Remission of catatonia            |                                    |                                                               |                            |
|                                                                          |                                      | 10-12                                                                                                 | Other (specify).....              |                                    |                                                               |                            |
| No                                                                       | >12                                  | Time to 50% improvement                                                                               | Time to full Resolution           | Yes, prescribed?                   | No, not prescribed                                            |                            |
|                                                                          |                                      | <3 days                                                                                               | <3 days                           | If so what is the No. of sessions? |                                                               |                            |
|                                                                          |                                      | 4-7 days                                                                                              | 4-7 days                          |                                    |                                                               |                            |
|                                                                          |                                      | >1 week                                                                                               | >1 week                           |                                    |                                                               |                            |
| <b>E. Duration of Catatonia prior to admission if known OR Not Known</b> | Hours to 3 days                      | <b>Duration of Catatonia Prior to admission?</b>                                                      | Any other additional information? |                                    |                                                               |                            |
|                                                                          | 4 days to 2 weeks                    |                                                                                                       | NOT known OR                      |                                    |                                                               |                            |
|                                                                          | 3 to 4 weeks                         |                                                                                                       | < 3 days                          |                                    |                                                               |                            |
|                                                                          | More than 4 weeks                    |                                                                                                       | 4 to 7 days                       |                                    |                                                               |                            |
|                                                                          |                                      | >7 days                                                                                               |                                   |                                    |                                                               |                            |
| <b>F. Type of onset</b>                                                  | Hours to days                        | Gradual                                                                                               | Fluctuating                       | <b>Mostly Excited Form?</b>        |                                                               | <b>Mostly Slowed Form?</b> |
|                                                                          |                                      |                                                                                                       |                                   |                                    |                                                               |                            |

|                                   |                                                                                                          |                   |            |                                   |                                                  |                 |           |  |
|-----------------------------------|----------------------------------------------------------------------------------------------------------|-------------------|------------|-----------------------------------|--------------------------------------------------|-----------------|-----------|--|
|                                   |                                                                                                          |                   |            | Excited/ Stereotypy/<br>Mannerism | Stupor/ Withdrawal/ Rigidity/ Mutism/<br>Staring |                 |           |  |
| <b>G.<br/>Food<br/>Insecurity</b> | 1. Within the past 12 months, we worried whether our food would run out before we got money to buy more. |                   |            |                                   |                                                  |                 |           |  |
|                                   | Often<br>True                                                                                            | Sometimes<br>true | Never true | Don't know                        | Other                                            |                 |           |  |
|                                   | 2. Within the past 12 months, the food we bought just didn't last and we didn't have money to get more.  |                   |            |                                   |                                                  |                 |           |  |
|                                   | Often<br>true                                                                                            | Sometimes<br>true | Never true | Don't know                        | Other                                            |                 |           |  |
| <b>H.<br/>Substances</b>          | YES                                                                                                      | NO                | Alcohol    | Cannabis                          | Amphet                                           | Heroin          | Metamphet |  |
|                                   |                                                                                                          |                   | Cocaine    | Opioids                           | Nicotine                                         | Other (Specify) |           |  |

| I. Medical Illness                              | No                        | Yes              | If Yes, chose from the following if on history only |                  | If Yes, choose from the following if current |                      | If HIV                   |                 |                      |     |
|-------------------------------------------------|---------------------------|------------------|-----------------------------------------------------|------------------|----------------------------------------------|----------------------|--------------------------|-----------------|----------------------|-----|
|                                                 |                           |                  | HPT                                                 | DM               | HPT                                          | DM                   | On HAART?                | No              |                      |     |
|                                                 |                           |                  | Epilepsy                                            | HIV              | Epilepsy                                     | HIV                  | If HIV on HAART, Regime? | If HIV, CD4?    |                      |     |
|                                                 |                           |                  | Head Trauma                                         | TB               | Head Trauma                                  | TB                   | If HIV, Viral Load?      | Other (specify) |                      |     |
|                                                 |                           |                  | SLE or Auto/I                                       | Other (specify)  |                                              | Other (specify)      |                          |                 |                      |     |
| J. Investigations:                              | <b>CK (u/l)</b>           |                  | <b>CK ≤ 200</b>                                     | <b>Fe μmol/l</b> | <b>Fe 9 to 30</b>                            | <b>VitB12 pmol/l</b> | <b>B12 ≤ 107</b>         |                 | <b>Auto/I Screen</b> |     |
|                                                 | CK 201 - 1000             |                  | CK ≥ 1000                                           | Fe ≤ 9           | Fe ≥ 30                                      | B12 108 - 221        | B12 ≥ 221                | RF              | ESR                  | ANA |
|                                                 | 1. CK – Creatinine Kinase |                  |                                                     |                  |                                              |                      |                          | < 14IU/ml       | < 29                 | Pos |
|                                                 | 2. Fe – Iron              |                  |                                                     |                  |                                              |                      |                          | OR              | OR                   | OR  |
|                                                 | 3. B12 – Vitamin B12      |                  |                                                     |                  |                                              |                      |                          | OR              | > 29                 | Neg |
| 4. TSH – Thyroid Stimulating Hormone            |                           |                  |                                                     |                  |                                              |                      | > 14IU/ml                |                 |                      |     |
| 5. T4 – Thyroid Hormone                         |                           |                  |                                                     |                  |                                              |                      |                          |                 |                      |     |
| 6. ANF – Nuclear Factor Rheumatoid Factor       |                           | Endocrine        | <b>TSH miu/l</b>                                    | ≤ 0.38           | ≥ 5.33                                       | <b>Cortisol</b>      | ≤ 184                    |                 | ≥ 618                |     |
|                                                 |                           |                  | <b>Normal TSH</b>                                   | 0.38 to 5.33     |                                              | <b>Normal (AM)</b>   | 185 to 617               |                 |                      |     |
|                                                 |                           |                  | <b>T4 pmol/l</b>                                    | ≤ 7.2            | ≥ 16.4                                       | <b>Cortisol (PM)</b> | ≤ 276 (pm)               |                 | ≥ 276                |     |
|                                                 |                           | <b>Normal T4</b> | 7.2 to 16.4                                         |                  | ≤ 276                                        |                      |                          |                 |                      |     |
| <b>END OF INPATIENT DATA CAPTURING SECTIONS</b> |                           |                  |                                                     |                  |                                              |                      |                          |                 |                      |     |

| <b>BEGINNING OF OUTPATIENT FOLLOW UP SECTION FIR PATIENTS WHO HAD CATATONIA</b>                                                 |                                                                                                                                      |                                                                                                                                          |                                       |                |              |
|---------------------------------------------------------------------------------------------------------------------------------|--------------------------------------------------------------------------------------------------------------------------------------|------------------------------------------------------------------------------------------------------------------------------------------|---------------------------------------|----------------|--------------|
| <b>K. Follow-up Period ONLY</b>                                                                                                 | <b>Date of Discharge</b>                                                                                                             | <b>1 month</b>                                                                                                                           | <b>2 months</b>                       | <b>3months</b> | <b>Other</b> |
| Please tick the applicable box                                                                                                  | Recurrence of Catatonia?<br>Yes<br>No                                                                                                | Recurrence of Catatonia?<br>Yes<br>No                                                                                                    | Recurrence of Catatonia?<br>Yes<br>No | Other?         |              |
|                                                                                                                                 | Re-Admission?<br>Yes<br>No                                                                                                           | Re-Admission?<br>Yes<br>No                                                                                                               | Re-Admission?<br>Yes<br>No            | Other?         |              |
| Please describe (in your own words) your experience/ of the catatonic episode in terms of your thoughts, feelings and behaviour | Uyacelwa uchaze (ngawakho amazwi) ngamava akho ngexesha ubune catatonia ngokwengcinga zakho, indlela obuziva ngayo nezinto obuzenza. | <b>PARTICIPANT RESPONSE RECORDED VERBATUM (USE AUDIO RECORDER)</b><br><br><b>Thoughts</b><br><br><b>Feelings</b><br><br><b>Behaviour</b> |                                       |                |              |
