# Supplementary material for: Protocol for a prospective descriptive prevalence study of catatonia in an acute mental health unit in urban South Africa
Source: PubMed Central journal article supplement — BMJ Open. 2020 Nov 6;10(11):e040176. doi: 10.1136/bmjopen-2020-040176 (PMC7651726; doi:10.1136/bmjopen-2020-040176), 2020-11-06
Supplement: bmjopen-2020-040176supp002.pdf [file bmjopen-2020-040176supp002.pdf]

## APPENDIX 2:

## CATATONIA RATING SCALE

## APPENDIX VII

## BUSH-FRANCIS CATATONIA RATING SCALE

Use presence or absence of items 1-14 for screening

Use the 0-3 scale for items 1-23 to rate severity

|                                                                                                                                                                                                                                                                                                                                                                  |                                                                                                                                                                                                                                                                                                                                                                      |
|------------------------------------------------------------------------------------------------------------------------------------------------------------------------------------------------------------------------------------------------------------------------------------------------------------------------------------------------------------------|----------------------------------------------------------------------------------------------------------------------------------------------------------------------------------------------------------------------------------------------------------------------------------------------------------------------------------------------------------------------|
| <p><b>1. Excitement:</b></p> <p>Extreme hyperactivity, constant motor unrest which is apparently non-purposeful. Not to be attributed to akathisia or goal directed agitation</p> <p>0 = Absent<br/>1 = Excessive motion<br/>2 = Constant motion, hyperkinetic without rest periods<br/>3 = Full-blown catatonic excitement, endless frenzied motor activity</p> | <p><b>2. Immobility/stupor:</b></p> <p>Extreme hypoactivity, immobile, minimally responsive to stimuli</p> <p>0 = Absent<br/>1 = Sits abnormally still, may interact briefly<br/>2 = Virtually no interaction with external world<br/>3 = Stuporous, non-reactive to painful stimuli</p>                                                                             |
| <p><b>3. Mutism:</b></p> <p>Verbally unresponsive or minimally responsive</p> <p>0 = Absent<br/>1 = Verbally unresponsive to majority of questions; incomprehensible whisper<br/>2 = Speaks less than 20 words/ 5 min<br/>3 = No speech</p>                                                                                                                      | <p><b>4. Staring:</b></p> <p>Fixed gaze, little or no visual scanning of environment, decreased blinking.</p> <p>0 = Absent<br/>1 = Poor eye contact, repeatedly gazes less than 20 seconds between shifting of attention; decreased blinking<br/>2 = Gaze held longer than 20 seconds, occasionally shifts attention<br/>3 = Fixed gaze, non-reactive</p>           |
| <p><b>5. Posturing/catalepsy:</b></p> <p>Spontaneous maintenance of posture(s), including mundane (e.g. setting or standing for long periods without reacting).</p> <p>0 = Absent<br/>1 = Less than 1 minute<br/>2 = Greater than one minute, less than 15 minutes<br/>3 = Bizarre posture, or mundane maintained more than 15 minutes</p>                       | <p><b>6. Grimacing:</b></p> <p>Maintenance of odd facial expressions.</p> <p>0 = Absent<br/>1 = Less than 10 seconds<br/>2 = Less than 1 minute<br/>3 = Bizarre expression(s) or maintained more than 1 minute</p>                                                                                                                                                   |
| <p><b>7. Echopraxia/echolalia:</b></p> <p>Mimicking of examiner's movements/speech.</p> <p>0 = Mimicking of examiner's movements/speech<br/>1 = Occasional<br/>2 = Frequent<br/>3 = Constant</p>                                                                                                                                                                 | <p><b>8. Stereotypy:</b></p> <p>Repetitive, non-goal-directed motor activity (e.g. finger-play; repeatedly touching, patting or rubbing self); abnormality not inherent in act but in frequency.</p> <p>0 = Absent<br/>1 = Occasional<br/>2 = Frequent<br/>3 = Constant</p>                                                                                          |
| <p><b>9. Mannerisms:</b></p> <p>Odd, purposeful movements (hopping or walking tiptoe, saluting passers-by or exaggerated caricatures of mundane movements); abnormality inherent in act itself.</p> <p>0 = Absent<br/>1 = Occasional<br/>2 = Frequent<br/>3 = Constant</p>                                                                                       | <p><b>10. Verbigeration:</b></p> <p>Repetition of phrases or sentences (like a scratched record).</p> <p>0 = Absent<br/>1 = Occasional<br/>2 = Frequent<br/>3 = Constant</p>                                                                                                                                                                                         |
| <p><b>11. Rigidity:</b></p> <p>Maintenance of a rigid position despite efforts to be moved, exclude if cog-wheeling or tremor present.</p> <p>0 = Absent<br/>1 = Mild resistance<br/>2 = Moderate<br/>3 = Severe, cannot be repositioned</p>                                                                                                                     | <p><b>12. Negativism:</b></p> <p>Apparently motiveless resistance to instructions or attempts to move/examine patient. Contrary behavior, does exact opposite of instruction</p> <p>0 = Absent<br/>1 = Mild resistance and/or occasionally contrary<br/>2 = Moderate resistance and/or frequently contrary<br/>3 = Severe resistance and/or continually contrary</p> |
| <p><b>13. Waxy Flexibility:</b></p> <p>During repositioning of patient, patient offers initial resistance before allowing himself to be repositioned, similar to that of a bending candle.</p> <p>0 = Absent<br/>3 = Present</p>                                                                                                                                 | <p><b>14. Withdrawal:</b></p> <p>Refusal to eat, drink and/or make eye contact.</p> <p>0 = Absent<br/>1 = Minimal PO intake/interaction for less than 1 day<br/>2 = Minimal PO intake/interaction for more than 1 day<br/>3 = No PO intake/interaction for 1 day or more.</p>                                                                                        |

**BUSH-FRANCIS CATATONIA RATING SCALE (CONT.)**

|                                                                                                                                                                                                                                                                                                                                |                                                                                                                                                                                                                                                                                                        |
|--------------------------------------------------------------------------------------------------------------------------------------------------------------------------------------------------------------------------------------------------------------------------------------------------------------------------------|--------------------------------------------------------------------------------------------------------------------------------------------------------------------------------------------------------------------------------------------------------------------------------------------------------|
| <p><b>15. Impulsivity:</b></p> <p>Patient suddenly engages in inappropriate behavior (e.g. runs down hallway, starts screaming or takes off clothes) without provocation. Afterwards can give no, or only a facile explanation.</p> <p>0 = Absent<br/>1 = Occasional<br/>2 = Frequent<br/>3 = Constant or not redirectable</p> | <p><b>16. Automatic obedience:</b></p> <p>Exaggerated cooperation with examiner's request or spontaneous continuation of movement requested.</p> <p>0 = Absent<br/>1 = Occasional<br/>2 = Frequent<br/>3 = Constant</p>                                                                                |
| <p><b>17. Mitgehen:</b></p> <p>"Anglepoise lamp" arm raising in response to light pressure of finger, despite instruction to the contrary.</p> <p>0 = Absent<br/>3 = Present</p>                                                                                                                                               | <p><b>18. Gegenhalten:</b></p> <p>Resistance to passive movement which is proportional to strength of the stimulus, appears automatic rather than willful.</p> <p>0 = Absent<br/>3 = Present</p>                                                                                                       |
| <p><b>19. Ambitendency:</b></p> <p>Patient appears motorically "stuck" in indecisive, hesitant movement.</p> <p>0 = Absent<br/>3 = Present</p>                                                                                                                                                                                 | <p><b>20. Grasp reflex:</b></p> <p>Per neurological exam</p> <p>0 = Absent<br/>3 = Present</p>                                                                                                                                                                                                         |
| <p><b>21. Perseveration:</b></p> <p>Repeatedly returns to same topic or persists with movement.</p> <p>0 = Absent<br/>3 = Present</p>                                                                                                                                                                                          | <p><b>22. Combativeness:</b></p> <p>Usually in an undirected manner, with no, or only a facile explanation afterwards.</p> <p>0 = Absent<br/>1 = Occasionally strikes out, low potential for injury<br/>2 = Frequently strikes out, moderate potential for injury<br/>3 = Serious danger to others</p> |
| <p><b>23. Autonomic abnormality:</b></p> <p>Circle: temperature, BP, pulse, respiratory rate, diaphoresis.</p> <p>0 = Absent<br/>1 = Abnormality of one parameter [excluding pre-existing hypertension]<br/>2 = Abnormality of two parameters<br/>3 = Abnormality of three or more parameters</p>                              | <p><b>TOTAL:</b> _____</p>                                                                                                                                                                                                                                                                             |
