# Supplementary material for: Protocol for a prospective descriptive prevalence study of catatonia in an acute mental health unit in urban South Africa
Source: PubMed Central journal article supplement — BMJ Open. 2020 Nov 6;10(11):e040176. doi: 10.1136/bmjopen-2020-040176 (PMC7651726; doi:10.1136/bmjopen-2020-040176), 2020-11-06
Supplement: bmjopen-2020-040176supp003.pdf [file bmjopen-2020-040176supp003.pdf]

**APPENDIX 3: INFORMED CONSENT FORM INFORMED CONSENT – ENGLISH**

## INFORMED CONSENT FOR A STUDY ON CATATONIA

Dear Participant or Relative

We are requesting your consent to enroll you in a study on catatonia and how the symptoms respond to the treatment you are going to be given.

**YES, I AGREE TO BE ENROLLED**

I .....

agree in **voluntarily** taking part in the study as explained to me by the doctor/ nurse**OR**

(In cases where the patient is incapable of giving consent but is not opposed to taking part in the study, then a relative or custodian may provide informed consent by also signing below)

I ..... being the .....of

..... **willingly** agree that he/she may take part in the study which has been explained to us by the doctor/ nurse

Signature ..... of ..... participant/relative/ ..... custodian:

.....

Signed by ..... at..... on the

..... of.....2019

**NO, I DO NOT AGREE TO BE ENROLLED**

I .....

do not agree in taking part in the study as explained to me by the doctor/ nurse OR

I ..... being the .....of  
 ..... do not agree that he/she may take part in the study which has been explained to us by the doctor/ nurse

**Signature** ..... **of** ..... **participant/relative/** ..... **custodian:**  
 .....

**FOR OFFICE USE ONLY: ASSESSMENT OF CAPACITY TO CONSENT BASED ON UBACC**

| <i>Does the patient....</i>                                             | <i>Yes</i> | <i>No</i> |
|-------------------------------------------------------------------------|------------|-----------|
| <i>1. Understand the information relevant to the decision?</i>          | .....      | .....     |
| <i>2. Retain the information long enough to consider it?</i>            | .....      | .....     |
| <i>3. Weigh the information as part of the decision-making process?</i> | .....      | .....     |
| <i>4. Communicate their decision in some way?</i>                       | .....      | .....     |

*Please Note: Should there be a no answer to any of the 4 questions above then the patient lacks capacity to consent and a relative or custodian may then be requested to provide informed consent.*

**INFORMED CONSENT - ISIXHOSA****IPHEPHA-MVUME LOPHANDO NGESIGULO SE-CATATONIA**

*Mthathi-nxaxheba obekekileyo okanye Mzali okanye sizalwane esibekileyo*

Sicela imvume yakho yokuphanda nzulu ngeempawu zesi sigulo i-catatonia, nokuba unyango ozakulufumana luzakusebenzela njani na.

Ndiye ndanikwa iphepha elichaza ngolu phando kwaye ndiluchazelwe ngu  
.....

**EWI NDIYAVUMA**

Mna (faka igama lakho apha) .....  
ndiyazikhethela ukulungenela olu phando ndiluchazelwe ngugqirha okanye umongikazi, kwaye andinyanzeliswa.

**OKANYE**

Ukuba umntu akakwazi ukunika imvume ngasizathu sithile, kodwa abe engali ukulungenela uphando, kungatyikitya umzali okanye isizalwane  
Isayinwe ngu..... e..... ngomhla we.....  
kwinyanga ye.....ku 2019

**HAYI NDIKHETHA UKUNGALUNGENELI OLU PHANDO**

Mna (faka igama lakho apha) ..... ndikhetha ukuba ndingalungeni olu phando ndiluchazelwe ngugqirha okanye umongikazi

Mna ndingu.....(Chaza uhlobene njani nomthathi-nxaxheba)  
ka.....(igama lomthathi nxaxheba)

Isaynwe e..... ngomhla we..... kwinyanga ye.....ku  
2019

Utyikitya apha wena okanye umzali okanye isizalwane

.....

## APPENDIX 4: INFORMATION LEAFLETS IN ENGLISH AND XHOSA

### 4.1 - INFORMATION LEAFLET (XHOSA)

#### **Iphepha lokwazisa umthathi-nxaxheba kuphando lwesigulo i-Catatonia**

Mthathi-nxaxheba obekekileyo *okanye* Mzali okanye sizalwane esibekekileyo

Ngale ncwadi sikwazisa malunga ngophando nzulu oluqhutywa ziinzululwazi ezifuna ukufunda nzulu ngesigulo ekuthiwa yi-catatonia kweli ziko lempilo. Unyango obuhleli uzakulufumna alusayi kutshintsha okanye luphazamiseke wakuthatha inxaxheba kolu phando.

#### **Yintoni i-catatonia?**

I-catatonia sisigulo esiye sibangele ukuphazamiseka kwindlela umntu ashukuma ngayo apha emzimbeni. Kwabanye abantu sibangela ukuba umzimba lo ucothe kakhulu okanye ungakwazi kushuma, umntu azive eqinile, athi nokuba uyafuna ukushumisa umzimba wakhe njengesiqhelo ungakwazi. Ide ibangele loo nto ngelinye ixesha ukuba umntu aphethe ehleli ndawoninye okanye emile ndawoninye de kugqithe imizuzu emininzi okanye iiyure zibe liqela. Iyakwazi nokubangela ukuba umntu ungakwazi ukuphuma kwasebhedini, ungakwazi kuzityisa, ungakwazi kuzihlamba, asoloko elele ebhedini okanye ehleli esitulweni.

Kwelinye icala i-catatonia iyakwazi ukubangela ukuba umntu athi ngoku sele eqalile ukushukuma esithi wenza into ethile, suka umzimba lo uqine, aphethe amalungu omzimba afana neengalo, izandla, imilenze okanye iinyawo zilenga emoyeni ungakwazi ukuyigqibezela laa nthsukumo ebeyiqalile. Intamo nentloko nazo ziyakwazi ukuphetha zikekele ngenxa yoku kuqina komzimba kuvela ngesiquphe.

Okokugqibela, i-catatonia iyakwazi ukuphinda ibangele intshukumo engaphaya kunesiqhelo, aphethe umntu eshuku-shukuma kakhulu, angahlali ndawonye okanye angazinzi. Abanye baye bazule ndawoninye, abanye baqhweba izandla unomphelo okanye banqwale kungenjalo baninike intloko into engapheliyo.

Iyakwazi nokuvela ngokuba omnye umntu abetha-bethe amanqindi emoyeni, omnye athi nokuba usebhedini kube ngathi unyomfa ibhaysikili into engapheliyo. Babakhona nabaphetha bethetha into enye,
