# Supplementary material for: Protocol for a prospective descriptive prevalence study of catatonia in an acute mental health unit in urban South Africa
Source: PubMed Central journal article supplement — BMJ Open. 2020 Nov 6;10(11):e040176. doi: 10.1136/bmjopen-2020-040176 (PMC7651726; doi:10.1136/bmjopen-2020-040176), 2020-11-06
Supplement: bmjopen-2020-040176supp005.pdf [file bmjopen-2020-040176supp005.pdf]

## APPENDIX 5: INSTITUTIONAL PERMISSIONS –DORA NGINZA HOSPITAL

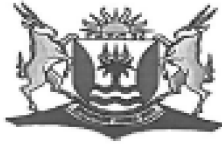

Province of  
**EASTERN CAPE**  
HEALTH

**DORA NGINZA REGIONAL HOSPITAL**

DEPARTMENT OF PSYCHIATRY & MENTAL HEALTH UNIT  
Spreeds Street - Zanda - Port Elizabeth - 6205.  
Private Bag 2, 11801 - Port Elizabeth - 6205.  
Telephone +27 41 408 4380 • Fax +27 41 408 4887

## DEPARTMENT OF PSYCHIATRY REQUEST FOR CEO APPROVAL OF DEPARTMENTAL RESEARCH

|         |                                                                                |
|---------|--------------------------------------------------------------------------------|
| To      | Mr P Tsibolane<br>Chief Executive Officer<br>Dora Nginza Hospital              |
| From    | Dr A Bronkhorst, Prof S van Wyk and Prof Z Zingela<br>Department of Psychiatry |
| Subject | DEPARTMENT OF PSYCHIATRY REQUEST FOR CEO APPROVAL OF DEPARTMENTAL RESEARCH     |
| Date    | 08 November 2018                                                               |

**Introduction**

The Department of Psychiatry and Walter Sisulu University have identified research projects in catatonia as a priority for the Eastern Cape due to the severity of the illness and the potentially negative outcomes resulting from delay in recognition of the cognition

**Requested support**

CEO approval and support for the research project on Catatonia: "Catatonia as a manifestation of serious mental illness: prevalence, presentation, management and outcomes in a mental health unit", is hereby requested on behalf of the investigators to initiate this study in the Department of Psychiatry in Dora Nginza Hospital.

**Conclusion**

This project is also expected to yield support for other ongoing and planned registrar research projects on Catatonia. Thank you for considering this request.

  
A Bronkhorst

  
S van Wyk

  
Z Zingela

The request for approval is hereby granted / not granted (please delete as appropriate)

Signature:  Designation: CEO Date: 08.11.18

Name: M.P. TSIBOLANE

Dora Nginza Regional Hospital  
Chief Executive Officer  
Mr M.P. Tsibolane

Signature: .....

Date: .....
