# Supplementary material for: Protocol for a prospective descriptive prevalence study of catatonia in an acute mental health unit in urban South Africa
Source: PubMed Central journal article supplement — BMJ Open. 2020 Nov 6;10(11):e040176. doi: 10.1136/bmjopen-2020-040176 (PMC7651726; doi:10.1136/bmjopen-2020-040176), 2020-11-06

## APPENDIX 6: INSTITUTIONAL PERMISSIONS

### APPROVAL FROM EC HEALTH RESEARCH COMMITTEE

#### APPENDIX VI

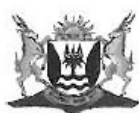

#### Eastern Cape Department of Health

Enquiries: Madoda Xokwe  
Date: 19 December 2017  
e-mail address: madoda.xokwe@ecodh.gov.za

Tel No: 040 608 0710  
Fax No: 043 642 1409

Dear Prof. Z. Zingela

Re: Catatonia As A Presentation For Severe Mental Illness: Prevalence Of Catatonia In Two Mental Health Units In Urban And Rural South Africa (EC\_201712\_015)

The Department of Health would like to inform you that your application for conducting a research on the abovementioned topic has been approved based on the following conditions:

1. During your study, you will follow the submitted protocol with ethical approval and can only deviate from it after having a written approval from the Department of Health in writing.
2. You are advised to ensure, observe and respect the rights and culture of your research participants and maintain confidentiality of their identities and shall remove or not collect any information which can be used to link the participants.
3. The Department of Health expects you to provide a progress on your study every 3 months (from date you received this letter) in writing.
4. At the end of your study, you will be expected to send a full written report with your findings and implementable recommendations to the Epidemiological Research & Surveillance Management. You may be invited to the department to come and present your research findings with your implementable recommendations.
5. Your results on the Eastern Cape will not be presented anywhere unless you have shared them with the Department of Health as indicated above.

Your compliance in this regard will be highly appreciated.

SECRETARIAT: EASTERN CAPE HEALTH RESEARCH COMMITTEE

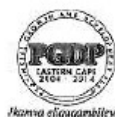

Supplement: bmjopen-2020-040176supp006.pdf [file bmjopen-2020-040176supp006.pdf]
